# Supplementary material for: Nicotine Exposure in a Phencyclidine-Induced Mice Model of Schizophrenia: Sex-Selective Medial Prefrontal Cortex Protein Markers of the Combined Insults in Adolescent Mice
Source: Int J Mol Sci. 2023 Sep 27;24(19):14634. doi: 10.3390/ijms241914634 (PMC10572990; doi:10.3390/ijms241914634)
Supplement: Supplementary file 1 [file ijms-24-14634-s001.zip › Rodríguez-VegaSM1-Excel data.xls]

## Sheet: Sheet_1_Peptides_3594
Sheet S1. Complete list of peptides identified in the mPFC
Sequence Peptide
HQALQAEIAGHEPR
CNSLEEIKALR
FLADFRDLTSWVTEMK
DLASVQALLR
LGESQTLQQFSR
LETAEDIQERR
DLTGVQNLR
AQLADSFHLQQFFR
QDLEDSLQAQQYFADANEAESWMREK
IEDLGAAMEEALILDNK
HQLLEADISAHEDR
IRGVIDMGNSLIER
GMLEKSCKK
RWTQLLANSATR
SKLGESQTLQQFSR
SSEEIESAFRALSSEGKPYVTK
IAALQAFADQLIAVDHYAK
SLQQLAEER
KAKLDENSAFLQFNWK
ASAFNSWFENAEEDLTDPVRCNSLEEIK
DLAALGDKVNSLGETAQR
DGHVSLQEYMAFMISRETENVK
DLNSQADSLMTSSAFDTSQVKEK
AGTFQAFEQFGQQLLAHGHYASPEIK
ITALDEFATK
REELITNWEQIR
SADESGQALLAASHYASDEVR
EAFLNTEDKGDSLDSVEALIK
ENLLEEQGSIALR
EAIVTSEELGQDLEHVEVLQK
FNRDVDETIGWIKEKEQLMASDDFGRDLASVQALLR
EANELQQWITEK
LIQNNHYAMEDVATR
EPIAASTNR
VLETAEDIQER
HALLEADVAAHQDR
LAALADQWQFLVQK
ALINADELANDVAGAEALLDR
TKQDEVNAAWQR
SSLSSAQADFNQLAELDR
QFQDAGHFDAENIK
HQAFEAEVQANSGAIVK
DLSSVQTLLTK
DGHVSLQEYMAFMISR
EAGSVSLRMKQVEELYQSLLELGEK
DSDELKSWVNEKMK
WTQLLANSATR
QVEELYQSLLELGEK
EKEPIVGSTDYGKDEDSAEALLK
TATDEAYKDPSNLQGK
FDDFQKDLK
DHCLELQLFHR
KHQLLEADISAHEDR
LSDDNTIGQEEIQQR
ELVLALYDYQEK
LGESQTLQQFSRDVDEIEAWISEK
RWTQLLANSATRK
VNSLGETAQR
VNEVSQFAAK
ADVVESWIGEKENSLK
TALLELWELRRQQYEQCMDLQLFYR
QGKLFGAAEVQR
ASAFNSWFENAEEDLTDPVR
DLTSWVTEMK
NVEDIELWLYEVEGHLASDDYGK
QDLEDSLQAQQYFADANEAESWMREKEPIVGSTDYGK
LEAELAAHEPAIQGVLDTGK
SQLLGSAHEVQR
QDEVNAAWQRLK
KFDDFQK
NQALNTDNYGHDLASVQALQR
SSLSSAQADFNQLAELDRQIK
MTLVASEDYGDTLAAIQGLLK
SLGYDLPMVEEGEPDPEFEAILDTVDPNR
KFEEFQTDLAAHEER
RQQYEQCMDLQLFYRDTEQVDNWMSK
FLSDFRDLMSWINGIR
ELPTAFDYVEFTRSLFVN
DLIGVQNLLKK
GDILTLLNSTNKDWWK
AAAQR
FQFFQR
DLMSWINGIRGLVSSDELAK
KIEDLGAAMEEALILDNK
SADESGQALLAASHYASDEVREK
GDSLDSVEALIK
LIQSHPESAEDLK
EQLMASDDFGRDLASVQALLRK
EQAQSCRQQVAPMDDETGK
VASNPYTWFTMEALEETWR
VASNPYTWFTMEALEETWRNLQK
TYLLDGSCMVEESGTLESQLEATK
HQAFEAELHANADRIR
LAQFVEHWK
DPSGVK
QEAFLLNEDLGDSLDSVEALLK
LEESLEYQQFVANVEEEEAWINEK
HEALMSDLSAYGSSIQALR
AWVQRRMMLDHCLELQLFHR
VNDVCTNGQDLIK
NVEDIELWLYEVEGHLASDDYGKDLTNVQNLQK
WEQIR
HEGLERDLAALEDK
GRELPTAFDYVEFTRSLFVN
LQTASDESYKDPTNIQSK
QVEELYQSLLELGEKR
DVTGAEALLERHQEHRTEIDAR
RQDLEDSLQAQQYFADANEAESWMR
SWVNEKMKTATDEAYK
GDILTLLNSTNKDWWKVEVNDR
LLEAQSHFR
TYLLDGSCMVEESGTLESQLEATKR
LGDSHDLQR
DWWKVEVNDR
EKEQLMASDDFGRDLASVQALLR
DFDFWLSEVEALLASEDYGK
VAEDLESEGLMAEEVQAVQQQEVYGAMPR
AGTFQAFEQFGQQLLAHGHYASPEIKEK
AKLDENSAFLQFNWKADVVESWIGEK
LEDSYRFQFFQRDAEELEK
DLTSWVTEMKALINADELANDVAGAEALLDR
HQLLEADISAHEDRLKDLNSQADSLMTSSAFDTSQVK
INGPNNAHIQQVGDR
GQFSTDELVAEVEKR
LLYNNVSNFGR
DAMQYASESKDTELAEELLQWFLQEEK
LLLPWLEAR
SQPIEGHAASFAQFK
VGYTPDWIFLLR
LASTLVHLGEYQAAVDGAR
NNLAGAEELFAR
LAELEEFINGPNNAHIQQVGDR
ISGETIFVTAPHEATAGIIGVNR
LHIIEVGTPPTGNQPFPK
FQSVPAQPGQTSPLLQYFGILLDQGQLNK
EHLELFWSR
IYIDSNNNPER
KFDVNTSAVQVLIEHIGNLDR
GMVKEAIDSYIK
AFMTADLPNELIELLEK
VVGAMQLYSVDR
ALEHFTDLYDIK
RPLIDQVVQTALSETQDPEEVSVTVK
TLQIFNIEMK
HELIEFR
KDPELWGSVLLESN
GQFSTDELVAEVEK
FDVNTSAVQVLIEHIGNLDR
HELIEFRR
VIQCFAETGQVQK
TRVMEYINR
IVLDNSVFSEHR
GYFEELITMLEAALGLER
IHEGCEEPATHNALAK
LLEMNLMHAPQVADAILGNQMFTHYDR
LPVVIGGLLDVDCSEDVIK
SVNESLNNLFITEEDYQALR
FQEHLQLQNLGINPANIGFSTLTMESDK
YLQMAR
FNALFAQGNYSEAAK
CNEPAVWSQLAK
GQCDLELINVCNENSLFK
TLQIFNIEMKSK
STDELVAEVEKR
EDKLECSEELGDLVK
LECSEELGDLVK
KDPELWGSVLLESNPYR
YHEQLSTQSLIELFESFK
DTELAEELLQWFLQEEK
HNIMDFAMPYFIQVMK
YESLELCRPVLQQGR
NNRPSEGPLQTR
KFNALFAQGNYSEAAKVAANAPK
WLKEDK
FDFVHDLVLYLYR
RDPHLACVAYER
WISLNTVALVTDNAVYHWSMEGESQPVK
FNALFAQGNYSEAAKVA
WLLLTGISAQQNRVVGAMQLYSVDR
AGKTLQIFNIEMK
VMEYINR
GNNRWKQSVELCK
AHMGMFTELAILYSK
HAASFAQFK
KVGYTPDWIFLLRNVMR
VDKLDASESLR
LPWLEAR
MYDAAKLLYNNVSNFGR
FQSVPAQPGQTSPLLQYFGILLDQGQLNKYESLELCRPVLQQGR
FDVNTSAVQVLIEHIGNLDRAYEFAERCNEPAVWSQLAK
AVDVFFPPEAQNDFPVAMQISEK
PWLEAR
VSQPIEGHAASFAQF
ADDPSSYMEVVQAANASGNWEELVK
MEGNAEESTLFCFAVRGQAGGK
RECFGACLFTCYDLLRPDVVLETAWR
TSIDAYDNFDNISLAQRLEK
PATHNALAK
DPELWGSVLLESNPYR
AMLSANIR
IDSYIK
ADRTRVMEYINR
VLRAAEQAHLWAELVFLYDK
ECFGACLFTCYDLLRPDVVLETAWR
RFQSVPAQPGQTSPLLQYFGILLDQGQLNK
PYFIQVMK
QLPLVKPYLR
HNIMDFAMPYFIQVMKEYLTK
TLQIFNIEMKSKMK
EAKLTDQLPLIIVCDR
IYIDSNNNPERFLRENPYYDSR
KFDVNTSAV
SKMKAHTMTDDVTFWK
WLLLTGISAQQNR
QVLIEHIGNLDR
SFEGLFYFLGSIVNFSQDPDVHFK
AHMGMFTELAILYSKFKPQKMR
FEELNADLFR
NQVAMNPTNTVFDAK
TTPSYVAFTDTER
MVNHFIAEFKR
LLQDFFNGK
SINPDEAVAYGAAVQAAILSGDK
IINEPTAAAIAYGLDKK
SFYPEEVSSMVLTK
DAGTIAGLNVL
STAGDTHLGGEDFDNR
EIAEAYLGK
TVTNAVVTVPAYFNDSQR
SQIHDIVLVGGSTR
NSLESYAFNMKATVEDEKLQGK
NQVAMNPTNTVFDAKR
EDIERMVQEAEK
VEIIANDQGNR
PTNTVFDAKR
VCNPIITK
CNEIISWLDK
GPAVGIDLGTTYSCVGVFQHGK
NQTAEKEEFEHQQK
LSKEDIERMVQEAEK
HWPFMVVNDAGRPK
DAGTIAGLNVLRIINEPTAAAIAYGLDK
ARFEELNADLFR
SQIHDIV
CNEIISWLDKNQTAEK
TVTNAVVTVPAYFNDSQRQATK
MVNHFIAEFK
DKVSSKNSLESYAFNMK
TTPSYVAFTDTERLIGDAAK
KVGAERNVLIFDLGGGTFDVSILTIEDGIFEVK
RTLSSSTQASIEIDSLYEGIDFYTSITR
EEFEHQQKELEK
VQVEYKGETK
LLQDFFNGKELNK
AEAYLGK
MKEIAEAYLGKTVTNAVVTVPAYFNDSQR
RFDDAVVQSDMKHWPFMVVNDAGRPK
ENKITITNDK
SFYPEEVSSMVLTKMKEIAEAYLGK
VGGSTR
LYQSAGGMPGGMPGGFPGGGAPPSGGASSGPTIEEVD
MVQEAEKYKAEDEK
QTQTFTTYSDNQPGVLIQVYEGERAMTK
LSKEDIER
TLSSSTQASIEIDSLYEGIDFYTSITR
SENVQDLLLLDVTPLSLGIETAGGVMTVLIK
ILDKCNEIISWLDKNQTAEK
GVVDSEDLPLNISR
ADLINNLGTIAK
YIDQEELNK
HLEINPDHPIVETLR
IDIIPNPQER
YESLTDPSKLDSGK
ELISNASDALDK
EKYIDQEELNK
SLTNDWEDHLAVK
LGIHEDSTNRR
EQVANSAFVER
GVVDSEDLPLNISREMLQQSK
LDSGKELK
LVSSPCCIVTSTYGWTANMERIMK
TKPIWTR
YESLTDPSK
HSQFIGYPITLYLEK
KCLELFSELAEDK
APFDLFENK
VFIMDSCDELIPEYLNFIR
EFDGKSLVSVTK
CLELFSELAEDKENYK
VILHLKEDQTEYLEER
ETQKSIYYITGESKEQVANSAFVER
GFEVVYMTEPIDEYCVQQLK
EGLELPEDEEEKKK
LDSGKELKIDIIPNPQER
LGLGIDEDEVTAEEPSAAVPDEIPPLEGDEDASR
YHTSQSGDEMTSLSEYVSR
LVSSPCCIVTSTYGWTANMER
LGIHEDSTNR
HSQFIGYPITLYLEKER
LSELLRYHTSQSGDEMTSLSEYVSRMK
NPDDITQEEYGEFYKSLTNDWEDHLAVK
YHTSQSGDEMTSLSEYVSRMKETQK
EIFLRELISNASDALDK
MEESKAKFENLCK
ADLINNLGTIAKSGTK
EGLELPEDEEEKK
LSELLRYHTSQSGDEMTSLSEYVSR
HLEINPDHPIVETLRQKAEADK
IMKAQALRDNSTMGYMMAK
APFDLFENKK
DLVVLLFETALLSSGFSLEDPQTHSNR
IPR
IEDVGSDEEDDSGKDKK
HNDDEQYAWESSAGGSFTVR
RVFIMDSCDELIPEYLNFIR
GEVQMEFIQLPK
VTSEPEAVSERR
QSTEPSIVMPSIGLSAEPPAPK
EYYKNGTVMAPDLPEMLDLAGTR
TGVIQTSTEQSFSK
NKDDLTLSR
VADVSISEVTTLLGNVHSPVVEGYVGENISGEVK
GLSSVPEVAEVEPTTK
VTKPDLVHQEAVDK
MPSKPGEDFEHAALVPDTSK
YFETSALK
VKDEFTAEK
AEQAKVTGGQTIQVETSSESPFPAKEYYK
VTSEPEAVSER
FAAPAQPEEER
AEPSQLDIK
EIQGLFEEKTADK
ESSKDEEPLKDK
TTAASGDLAQAPGAFK
LPPVPFAQTFGTNLEDR
FPSSFAEPLDK
WEGKQFDSPMPSPFHGGSFTLPLDTMK
SDTLQISDLLVSESR
LDEKSTVSIEEAVAK
EIQGLFEEK
GVVESVVTIEDDFITVVQTTTDEGESGSHSVR
VGSLDNAHHVPGGGNVK
DVLEDIPR
SSVASPRR
ENGINGELTSADRETAEEVSAR
YTVPLPSPVQDSENLSGESGSFYEGTDDKVR
HHVPGGGNVK
GHDLSPLASDILTNTSGSMDEGDDYLPPTTPAVEK
TPQDKKDLQGMEGEK
SGTSTPTTPGSTAITPGTPPSYSSR
EPSTVSRDEVR
APHWTSASLTEAAAHPHSPEMK
SEEHIDSKEHAK
FAAPAQPEEERRPRPHDEELEIEMAAEAQAEPK
VTDGISK
LEGAGSATIAEVEMPFYEDK
RPRPHDEELEIEMAAEAQAEPK
SQGTYSDTKENGINGELTSADR
QDSFPISLEQAVTDAAMTSK
LSNVSSSGSINLLESPQLATLAEDVTAALAK
SMSINLPMSCLDSIALGFNFGR
VTTDQEKKETSAPSVQEPTLTETEPQTK
LTTPTYGDLNHLVSATMSGVTTCLR
NSSYFVEWIPNNVK
RISEQFTAMFRR
SGPFGQIFRPDNFVFGQSGAGNNWAK
AILVDLEPGTMDSVR
FPGQLNADLR
LAVNMVPFPR
GHYTEGAELVDSVLDVVR
EVDEQMLNVQNK
ISEQFTAMFR
MSATFIGNSTAIQELFK
EIVHIQAGQCGNQIGAK
ALTVPELTQQMFDSK
FWEVISDEHGIDPTGSYHGDSDLQLER
IMNTFSVMPSPK
IREEYPDR
YLTVAAIFR
LHFFMPGFAPLTSR
LTTPTYGDLNHLV
RISEQFTAMFR
ESESCDCLQGFQLTHSLGGGTGSGMGTLLISK
TAVCDIPPR
PLTSR
LHFFMPGFA
INVYYNEATGNK
GRMSMKEVDEQMLNVQNK
GHYTEGAELVDSVLDVVRK
GHYTEGAELVDSV
GHYTEGAELVDSVLDVV
PDR
APLTSR
GHYTEGAELV
VNMVPFPR
INVYYNEATGNKYVPR
GHYTEGAEL
ISEQFTAMFRRK
PGTMDSVR
VSDTVVEPYNATLSVHQLVENTDETYCIDNEALYDICFR
IREEY
INVYYNEATGNKYVPRAILVDLEPGTMDSVR
LTTPTYGDLNHLVSATMSGVTTCLRFPGQLNADLR
FAPLTSR
IREE
GSQQYRALTVPELTQQMFDSKNMMAACDPR
KLAVNMVPFPR
SAAEVIAQARK
ILDLGITGPEGHVLSRPEEVEAEAVNR
QIGENLIVPG
SITIANQTNCPLYVTK
GTVVYGEPITASLGTDGSHYWSK
NLHQSGFSLSGAQIDDNIPR
FQLTDSQIYEVLSVIR
AALAGGTTMIIDHVVPEPGTSLLAAFDQWR
GLYDGPVCEVSVTPK
PGGIDVHTR
SAAEVIAQAR
IVLEDGTLHVTEGSGR
VFNLYPR
MDENQFVAVTSTNAAK
KPFPDFVYK
GIQEEMEALVK
DNFTLIPEGTNGTEER
GSPLVVISQGK
MVIPGGIDVHTR
MSVIWDK
IPGGIDVHTR
PLVVISQGK
LEDGTLHVTEGSGR
AAAFVTSPPLSPDPTTPDFLNSLLSCGDLQVTGSAHCTFNTAQK
SCCDYSLHVDITEWHK
ANITSLG
ISVGSDADLVIWDPDSVK
DLGITGPEGHVLSRPEEVEAEAVNR
TIEAHSRMVIPGGIDVHTR
NLHQSGFSLSGAQIDDNI
YGEPITASLGTDGSHYWSK
DHGVNSFLVYMAFK
QEEMEALVK
VYGEPITASLGTDGSHYWSK
IVAPPGGR
AAAFVTSPPLSPDPTTPDFLNSLLSCGDLQVTGSAHCTFNTAQKAVGK
FNLYPR
AVVTGKMDENQFVAVTSTNAAK
GGKIVNDDQSFYADIYMEDGLIK
AVGKDNFTLIPEGTNGTEER
VHTR
DHGVNSFLVYMAFKDR
IVNDDQSFYADIYMEDGLIKQIGENLIVPGGVK
FQLTDSQI
MSVIWDKAVVTGK
SPTSSPTPQR
LQSQLLSIEK
TSGNQDEILVIR
GPAPGPPPAGSALGGAPPVPSRPGASPDPFGPPPQVPSRPNR
YMLSVDNLK
RPLVLQLVNSTTEYAEFLHCK
FPFELVK
SSVLENFVGR
MGTPYLQK
NLVDSYMAIVNK
EKKYMLSVDNLK
HIFALFNTEQR
LQDAFSAIGQNADLDLPQIAVVGGQSAGK
IEGSGDQIDTYELSGGARINR
GMEDLIPLVNR
HLADRMGTPYLQK
DMLMQFVTK
ALLQMVQQFAVDFEK
LEIEAETDR
VLNQQLTNHIR
ENCLILAVSPANSDLANSDALK
FFLSHPSYRHLADR
IEGSGDQIDTYELSGGAR
LSHPSYR
LDLMDEGTDARDVLENKLLPLR
ALLQMVQQFAVDFEKR
TIGVITKLDLMDEGTDARDVLENK
SSVLENFVGRDFLPR
PFELVK
EFIFSELLANLYSCGDQNTLMEESAEQAQR
APAVPPARPGSR
GGSKEYWFVLTAENLSWYK
RPLVLQL
LREEMERIVTTHIR
PAVPPARPGSR
ASETEENGSDSFMHSMDPQLERQVETIRNLVDSYMAIVNK
RPLVLQ
DVEKGFMSSKHIFALFNTEQR
GGSKEYWFVLTAENLSWYKDDEEK
VGDKEKASETEENGSDSFMHSMDPQLER
EFIFSELLANLYSCGDQNTLMEESAEQAQRR
VFPPEIVEQMGCK
KLFADAEEEQRR
EFSDIFRRAFASR
AESLQVTR
IDGVEQLNNILVIGMTNRPDLIDEALLRPGR
MGIGGLDKEF
SQLSCVVVDDIER
TPLVSVLLEGPPHSGK
NFSGAELEGLVR
AENSSLNLIGK
YVGESEANIR
IAEESNFPFIK
GILLYGPPGCGK
KLFADAEEEQR
AFASRVFPPEIVEQMGCK
MGIGGLDKEFSDIFR
KLLMLIEMSLQMDPEYRVR
ASTKVEVDMEK
GDFLASLENDIKPAFGTNQEDYASYIMNGIIK
LGANSGLHIIIFDEIDAICK
KWAGLSIGQDIEVALYSFDK
NIDSNPYDTDK
NFSGAELEGLVRAAQSTAMNR
YIFTLR
LQILHIHTAR
LFGLLVK
LGANSGLHIIIFDEIDAICKQRGSMAGSTGVHDTVVNQLLSK
MLNAREPK
THPSVVPGCIAFSLPQR
KNIDSNPYDTDK
QCIGTMTIEIDFLQK
FSNLVLQALLVLLKK
ICSPDKMIGFSETAKCQAMK
FSNLVLQALLVLLK
HIHTAR
IFDDAYKSQLSCVVVDDIER
ENRQSIINPDWNFEKMGIGGLDK
LLMLIEMSLQMDPEYR
MAAEFIQQFNNQAFSVGQQLVFSFNDK
VAPEEHPVLLTEAPLNPK
SYELPDGQVITIGNER
EITALAPSTMK
QEYDESGPSIVHR
GYSFTTTAER
KDLYANTVLSGGTTMYPGIADRMQK
AGFAGDDAPR
DSYVGDEAQSK
IWHHTFYNELR
CPEALFQPSFLGMESCGIHETTFNSIMK
TTGIVMDSGDGVTHTVPIYEGYALPHAILR
DLTDYLMK
AVFPSIVGRPR
LCYVALDFEQEMATAASSSSLEK
HQGVMVGMGQK
DLYANTVLSGGTTMYPGIADR
VAPEEHPVLLTEA
DLTDYLMKILTERGYSFTTTAER
EKLCYVALDFEQEMATAASSSSLEK
IIAPPER
CDVDIR
DLTDYLMKILTER
ILTERGYSFTTTAER
YSVWIGGSILASLSTFQQMWISKQEYDESGPSIVHRK
KYSVWIGGSILASLSTFQQMWISKQEYDESGPSIVHR
KDLYANTVLSGGTTMYPGIADR
CDVDIRK
SFTTTAER
FRCPEALFQPSFLGMESCGIHETTFNSIMK
PLNPK
IIAPPERK
LDLAGR
YSVWIGGSILASLSTFQQMWISKQEYDESGPSIVHR
MTQIMFETFNTPAMYVAIQAVLSLYASGR
HQGVMVGMGQKDSYVGDEAQSKR
ANREKMTQIMFETFNTPAMYVAIQAVLSLYASGR
LDLAGRDLTDYLMKILTER
YSVWIGGSILASLSTFQQMWISK
CVDMVVSELTSTIR
LDIDSAPITAR
NTGIICTIGPASR
GATLKITLDNAYMEK
EATESFASDPILYRPVAVALDTK
GDLGIEIPAEK
ITLDNAYMEK
GVNLPGAAVDLPAVSEK
GADFLVTEVENGGSLGSK
APIIAVTR
AEGSDVANAVLDGADCIMLSGETAK
LNFSHGTHEYHAETIK
AGKPVICATQMLESMIK
DAVLNAWAEDVDLR
GDYPLEAVR
KPVICATQMLESMIK
NTGIICTIGPAS
VNLAMDVGK
EKGADFLVTEVENGGSLGSKK
GIFPVLCK
CDENILWLDYK
KGVNLPGAAVDLPAVSEK
FGVEQDVDMVFASFIR
EMIKSGMNVAR
FPVLCK
PIIAVTR
FGVEQDVDMVFASFIRK
YPLEAVR
LDIDSAPITA
PLEAVR
SVEMLKEMIKSGMNVAR
AEGSDVANAVLDGADCIMLSGETAKGDYPLEAVR
TGLIKGSGTAEVELK
PVLCK
CNRAGKPVICATQMLESMIK
FGVEQDVDMV
DIQDLKFGVEQDVDMVFASFIRK
LNFSHGTHEYHAETIKNVR
MPKPHSEAGTAFIQTQQLHAAMADTFLEHMCR
FDPGQDTYQHPPK
NAVTQEFGPVPDTAR
SQFTITPGSEQIR
IVYGHLDDPANQEIER
NDANPETHAFVTSPEIVTALAIAGTLK
VAVPSTIHCDHLIEAQVGGEK
FNPETDFLTGK
FNPETDFLTGKDGK
LTGSLSGWTSPK
LEAPDADELPR
QGLLPLTFADPSDYNK
DINQEVYNFLATAGAK
SDFDPGQDTYQHPPK
TDIANLAEEFK
VDVSPTSQR
AGSALNRMK
VAMQDATAQMAMLQFISSGLPK
LQLLEPFDKWDGK
FKLEAPDADELPR
VGLIGSCTNSSYEDMGRSAAVAK
LQLLEPFDKWDGKDLEDLQILIK
HPNGTQETILLNHTFNETQIEWFR
ATIERDGYAQILRDVGGIVLANACGPCIGQWDR
DVGGIVLANACGPCIGQWDR
LQLLEPFDK
VAMSHFEPSEYIR
GGTGAIVEYHGPGVDSISCTGMATICNMGAEIGATTSVFPYNHR
DHLVPDPGCQYDQVIEINLNELKPHINGPFTPDLAHPVADVGTVAEK
PLDIR
GEKNTIVTSYNRNFTGR
QGLLPLTFADPSDYNKIHPVDK
EGWPLDIR
MAPYSLLVTR
DVGGIVLANACGPCIGQWDRKDIK
NTIVTSYNR
ATIERDGYAQILR
RAKDINQEVYNFLATAGAK
EGWPLDIRVGLIGSCTNSSYEDMGRSAAVAK
SGQASPSRPESPRPPFDL
HLEINPDHSIIETLR
ELISNSSDALDK
HIYFITGETKDQVANSAFVER
HIYFITGETK
DQVANSAFVER
RAPFDLFENR
DQVANSAFVERLR
VFIMDNCEELIPEYLNFIR
HGLEVIYMIEPIDEYCVQQLK
APFDLFENRK
AQALRDNSTMGYMAAK
DLVILLYETALLSSGFSLEDPQTHANR
CLELFTELAEDKENYK
KCLELFTELAEDKENYK
HSQFIGYPITLFVEK
LVTSPCCIVTSTYGWTANMER
IMKAQALRDNSTMGYMAAK
HFSVEGQLEFRALLFVPRR
FYEQFSK
EIFLRELISNSSDALDKIR
DKEVSDDEAEEKEEKEEEKEKEEK
QDRTLTIVDTGIGMTK
IMNTFSVVPSPK
FWEVISDEHGIDPTGTYHGDSDLQLDR
ALTVPELTQQVFDAK
EAESCDCLQGFQLTHSLGGGTGSGMGTLLISK
ISVYYNEATGGK
GSQQYRALTVPELTQQVFDAKNMMAACDPR
ISVYYNEATGGKYVPR
MAVTFIGNSTAIQELFK
YLTVAAVFR
NMMAACDPRHGRYLTVAAVFR
NTFSVVPSPK
EAESCDCLQGFQLTHSLGGGTGSGMGTLLISKIR
EEYPDRIMNTFSVVPSPK
KEAESCDCLQGFQLTHSLGGGTGSGMGTLLISK
FCTGLTQIETLFK
VLTPELYAELR
DLFDPIIEER
SMTEAEQQQLIDDHFLFDKPVSPLLLASGMAR
LGFSEVELVQMVVDGVK
LEQGQAIDDLMPAQK
SIRGFCLPPHCSR
LAVEALSSLDGDLSGR
NYEFMWNPHLGYILTCPSNLGTGLR
FPAEDEFPDLSSHNNHMAK
TFLVWINEEDHLR
TDLNPDNLQGGDDLDPNYVLSSR
YYALK
LVWINEEDHLR
SIRGFCLPPHCSRGER
GGNMKEVFTR
PNYVLSSR
HGGYQPSDEHKTDLNPDNLQGGDDLDPNYVLSSR
TFLVWINEEDHLRVISMQKGGNMK
PDLSSHNNHMAK
VISMQKGGNMKEVFTR
FCTGLTQIETLFKSK
FSEVLK
MPFSNSHNTQK
LGFSEVELV
QMVVDGVK
LRFPAEDEFPDLSSHNNHMAK
LGFSEVELVQMV
CTPSGFTLDDAIQTGVDNPGHPYIMTVGAVAGDEESYDVFK
RGTGGVDTAAVGGVFDVSNADR
GIWHNDNKTFLVWINEEDHLR
AIEKLAVEALSSLDGDLSGRYYALK
GTGGVDTAAVGGVFDVSNADR
TFLVWINEEDHLRVISMQK
MVVDGVK
DATNVGDEGGFAPNILENK
YITPDQLADLYK
GNPTVEVDLYTAK
AAVPSGASTGIYEALELR
VNQIGSVTESLQACK
IGAEVYHNLK
LAMQEFMILPVGASSFREAMRIGAEVYHNLK
LAMQEFMILPVGASSFR
SFVQNYPVVSIEDPFDQDDWGAWQK
IHAREIFDSR
YDLDFK
HIADLAGNPEVILPVPAFNVINGGSHAGNK
VNVVEQEK
SQAVEHINK
AASEKSCNCLLLK
GDEGGFAPNILENK
SGETEDTFIADLVVGLCTGQIK
TAIAKAGYTDQVVIGMDVAASEFYR
DATNVGDEGGFAPNILENKEALELLK
LAQSNGWGVMVSHR
IEEELGSK
YNQILR
SKFGANAILGVSLAVCK
PLYR
TRFMGKGVSQAVEHINK
GVSQAVEHINK
EIFDSRGNPTVEVDLYTAK
PVGASSFR
VEHINK
SERLAKYNQILR
YITPDQLADLYKSFVQNYPVVSIEDPFDQDDWGAWQKFTASAGIQVVGDDLTVTNPK
PALVSK
HIADLAGNP
AAVPSGASTGIYEALELRDNDK
EIFDSRGNPTVEVDLYTAKGLFR
YNQILRIEEELGSK
LGAEVYHTLK
LDNLMLELDGTENKSK
VNQIGSVTEAIQACK
IAPALISSGISVVEQEK
IEEELGDEAR
LAMQEFMILPVGAESFR
NYPVVSIEDPFDQDDWAAWSK
ACNCLLLK
DATNVGDEGGFAPNILENSEALELVK
YNQLMRIEEELGDEAR
LDNLMLELDGTENK
YITGDQLGALYQDFVR
EVYHTLK
LAQENGWGVMVSHR
YDLDFKSPADPSRYITGDQLGALYQDFVR
FAGHNFR
IERAVEEK
AGYTEKMVIGMDVAASEFYR
DGKYDLDFKSPADPSR
YDLDFKSPADPSR
YNQLMRIEEELGDEARFAGHNFR
FGANAILGVSLAVCKAGAAERDLPLYR
FTANVGIQIVGDDLTVTNPK
PALISSGISVVEQEK
PVGAESFR
YITGDQLGALYQDFVRNYPVVSIEDPFDQDDWAAWSKFTANVGIQIVGDDLTVTNPK
AGHNFR
DGKYDLDFK
FGANAILGVSLAVCKAGAAER
LAMQEFMILPVGAESFRDAMR
KLVYLYLMNYAKSQPDMAIMAVNSFVK
AKGLEISGTFTHR
LASQANIAQVLAELK
IQPGNPNYTLSLK
ITEYLCEPLR
LVYLYLMNYAK
EYATEVDVDFVR
MTDSKYFTTNK
LAPPLVTLLSGEPEVQYVALR
APEVSQYIYQVYDSILK
CRAPEVSQYIYQVYDSILKN
SQPDMAIMAVNSFVK
DLIADSNPMVVANAVAALSEISESHPNSNLLDLNPQNINK
LHDINAQMVEDQGFLDSLR
NVEGQDMLYQSLK
GEIFELK
STDPVTAK
AAMIWIVGEYAER
NSFGVIPSTPLAIHTPLMPNQSIDVSLPLNTLGPVMK
APEVSQYIYQVYDSILKN
GYIYWRLLSTDPVTAK
EYATEVDVDFVRK
ITEYLCEPLRK
YESIIATLCENLDSLDEPDAR
FLELLPKDSDYYNMLLK
NSFGVIPSTPLA
LQNNNVYTIAK
KPSETQELVQQVLSLATQDSDNPDLR
YPNKYESIIATLCENLDSLDEPDAR
LLSTDPVTAK
KYPNKYESIIATLCENLDSLDEPDAR
GLEISGTFTHR
IDNADELLESFLEGFHDESTQVQLTLLTAIVK
GLEISGTFTHRQGHIYMEMNFTNK
VGINYQPPTVVPGGDLAK
NLDIERPTYTNLNR
TIQFVDWCPTGFK
QLFHPEQLITGK
TIGGGDDSFNTFFSETGAGK
DIERPTYTNLNR
LIGQIVSSITASLR
IHFPLATYAPVISAEK
EDAANNYARGHYTIGK
AYHEQLSVAEITNACFEPANQMVK
FDGALNVDLTEFQTNLVPYPR
AVCMLSNTTAIAEAWAR
QLFHPEQLITGKEDAANNYAR
YMACCMLYRGDVVPK
IHFPLATYA
VQRAVCMLSNTTAIAEAWAR
VGINYQPPTV
ECISIHVGQAGVQIGNACWELYCLEHGIQPDGQMPSDK
PVISAEK
ERPTYTNLNR
LSVDYGK
LDHKFDLMYAK
IHFPLATY
PGGDLAK
APVISAEK
NAAIATIK
IHFPLAT
QLFHPE
CDPRHGKYMACCMLYR
TASLR
AFVHWYVGEGMEEGEFSEAREDLAALEK
LITGK
LIGQIV
ITGK
LADLCTGLQGFLIFHSFGGGTGSGFASLLMER
GILAADESTGSIAK
IGEHTPSALAIMENANVLAR
DDGRPFPQVIK
ALANSLACQGK
LQSIGTENTEENR
QLLLTADDR
FSNEEIAMATVTALR
ADDGRPFPQVIK
GVVPLAGTNGETTTQGLDGLSER
LQSIGTENTEENRR
GVVPLAGTNGETTTQGLDGL
CQYVTEKVLAAVYK
YASICQQNGIVPIVEPEILPDGDHDLKR
AAQEEYIK
YTPSGQSGAAASESLFISNHAY
PHPYPALTPEQK
IGEHTPSALAIMENA
ELSDIAHR
FSNEEIAMATVTALRR
CPLLKPWALTFSYGR
QGLDGLSER
ALSDHHVYLEGTLLKPNMVTPGHACTQK
AAQEEYIKR
TVPPAVTGVTFLSGGQSEEEASINLNAINK
MPHPYPALTPEQK
YASICQQNGIVPIVEPEILPDGDHDLK
RLQSIGTENTEENRR
SDIAHR
PEQK
TPEQK
PQVIK
KELSDIAHR
CVLKIGEHTPSALAIMENANVLARYASICQQNGIVPIVEPEILPDGDHDLK
TVPPAVTGVTFLSGGQSEEEASINLNAINKCPLLKPWALTFSYGR
KKGEWK
DNALLAQLIQDK
GEWKVLVVDQLSMR
ISEQTYQLSR
AAHVFFTDSCPDALFNELVK
LIQHAQIPPEDSEIITNMAHLGVPIVTDSTLR
VLVVDQLSMR
SQLLILDR
EPLPSLEAVYLITPSEK
SVHSLISDFKDPPTAK
KGEWKVLVVDQLSMR
SSASFSTTAVSAR
MTDIMTEGITIVEDINK
YRAAHVFFTDSCPDALFNELVKSR
MTDIMTEGITIVEDINKR
HIAEVSQEVTRSLKDFSSSK
GFDPSSPVLHELTFQAMSYDLLPIENDVYK
LCRVEQDLAMGTDAEGEKIK
DIMEDTIEDKLDTK
YETSGIGEAR
TLTEINIAFLPYESQVYSLDSADSFQSFYSPHK
HIAEVSQEVTR
HYPYISTR
VEQDLAMGTDAEGEK
MPQYQKELSK
DLSQMLKKMPQYQK
YSTHLHLAEDCMK
EVSQEVTR
PIVTDSTLR
LDTKHYPYISTR
DPPTAKYRAAHVFFTDSCPDALFNELVK
EVLLDEDDDLWIALR
TTMRDLSQMLKK
LDTKHYPYISTRSSASFSTTAVSAR
YGHWHKNKAPGEYR
LLFEELVR
CLAAALIVLTESGR
EAEAAMFHRLLFEELVR
FEELVR
MQHLIAREAEAAMFHR
EIIDLVLDR
LISQIVSSITASLR
YMACCLLYRGDVVPK
YMACCLLYR
LADQCTGLQGFLVFHSFGGGTGSGFTSLLMER
AVFVDLEPTVIDEVR
PTVIDEVR
FVDLEPTVIDEVR
IDLVLDR
IHFPLATYAPVISAEKAYHEQLTVAEITNACFEPANQMVKCDPR
LEFSIYPAPQVSTAVVEPYNSILTTHTTLEHSDCAFMVDNEAIYDICR
LISQIVSSIT
LISQIVSSI
MAALEK
IDEVR
GHYTIGKEIIDLVLDR
LISQIV
EIVHLQAGQCGNQIGAK
AVLVDLEPGTMDSVR
ALTVPELTQQMFDAK
FWEVISDEHGIDPTGTYHGDSDLQLER
INVYYNEATGGKYVPRAVLVDLEPGTMDSVR
KYEMFAQTLQQSRGFGSFR
FDREVDIGIPDATGR
GDDLSTAILK
QTNPSAMEVEEDDPVPEIRRDHFEEAMR
RELQELVQYPVEHPDKFLK
LGDVISIQPCPDVKYGK
MTNGFSGADLTEICQRACK
RSVSDNDIR
LGDVISIQPCPDVK
LADDVDLEQVANETHGHVGADLAALCSEAALQAIR
YEMFAQTLQQSRGFGSFR
MDELQLFR
VINQILTEMDGMSTK
NAPAIIFIDELDAIAPK
QAAPCVLFFDELDSIAK
ETVVEVPQVTWEDIGGLEDVKR
QTNPSAMEVEEDDPVPEIRR
GVLFYGPPGCGK
LAGESESNLR
FGMTPSKGVLFYGPPGCGK
LAGESESNLRK
VVETDPSPYCIVAPDTVIHCEGEPIKR
GPELLTMWFGESEANVR
EMVELPLR
ETVVEVPQVTWEDIGGLEDVK
SVSDNDIRK
ESIESEIR
KSPVAKDVDLEFLAK
GVLFYGPPGCGKTLLAK
RSVSDNDIRK
EIFDKARQAAPCVLFFDELDSIAK
IVSQLLTLMDGLK
INVYYNEAAGNK
INVYYNEAAGNKYVPR
VSDTVVEPYNATLSVHQLVENTDETYSIDNEALYDICFR
MAATFIGNSTAIQELFK
GHYTEGAELVDAVLDVVR
IREEFPDR
INVYYNEATGGNYVPR
TAVCDIPPRGLKMAATFIGNSTAIQELFK
GRMSMKEVDEQMLSVQSK
VPTPNVSVVDLTCR
GAAQNIIPASTGAAK
IVSNASCTTNCLAPLAK
PITIFQER
VIISAPSADAPMFVMGVNHEK
VIHDNFGIVEGLMTTVHAITATQK
LISWYDNEYGYSNR
ASCTTNCLAPLAK
VVDLMAYMASK
PELNGK
PSADAPMFVMGVNHEK
GLMTTVHAITATQK
WGEAGAEYVVESTGVFTTMEK
LTGMAFR
FNGTVKAENGK
TVDGPSGKLWR
GAAQNIIPASTGAA
MTTVHAITATQK
PTPNVSVVDLTCR
VIHDNFGIVE
VNGFGR
VIHDNFGIV
TTVHAITATQK
VEIVAINDPFIDLNYMVYMFQYDSTHGK
LEKPAKYDDIKK
PASTGAAK
VHAITATQK
IKK
VIHDNFGI
GILGYTEDQVVSCDFNSNSHSSTFDAGAGIALNDNFVK
EVDEQMLAIQSK
LHFFMPGFAPLTAR
LATPTYGDLNHLVSATMSGVTTSLR
MSSTFIGNSTAIQELFK
GRMSMKEVDEQMLAIQSK
FWEVISDEHGIDPSGNYVGDSDLQLER
ISVYYNEASSHK
NMMAACDPRHGRYLTVATVFR
ECENCDCLQGFQLTHSLGGGTGSGMGTLLISK
PLTAR
TLKLATPTYGDLNHLVSATMSGVTTSLR
SGAFGHLFRPDNFIFGQSGAGNNWAK
EVDEQMLAIQSKNSSYFVEWIPNNVK
QIEAQEKPRDVSSVELLMNNHQGIK
IDDIFERSQNIITDSSSLNAEAIRQR
VLDNAIETEK
DASVAEAWLLGQEPYLSSR
ITDLYTDLRDGR
EGEDMIAEEHFGSEKIR
IVSSNDVGHDEYSTQSLVK
LQALDTGWNELHK
MWEVLESTTQTK
TLETPAAQMEGFLNR
FMELLEPLSER
HQAFMAELASNKEWLDK
KAAMRETWLSENQR
DALLLWCQMK
LLTQHENIK
LVSQDNFGFDLPAVEAATK
HRPDLIDFDK
ALQFLKEQRVHLENMGSHDIVDGNHR
FYHDAKEIFGR
LQQFLRDLDDFQSWLSR
TQTAIASEDMPNTLTEAEK
LPEELGR
LAGIEER
ALVADSHPESER
FANSLVGVQQQLQAFNTYR
GDQVSQNGLPAEQGSPRMAGTMETSEMVNGAAEQR
LWEYLLELLR
TLETPAAQMEGFLNRK
DGLNEAWADLLELIDTR
QLQEDAARLQAAYAGDK
SEFRQNLGRMFIFYGNK
KKGPSTVTDLE
QLSNPQQEVQNIFK
ILVAGDTMDSVK
SDSQLKNADVELQQR
GPSTVTDLEETK
ACNQLGQFLQHR
SSPLIQFNLLHSK
IIGFGSALLEEVDPNPANFVGAGIIHTK
GDGMRGLAVFISDIR
EMAEAFAGEIPK
NAVLFEAISLIIHHDSEPNLLVR
NADVELQQRAVEYLR
GLAVFISDIRNCK
GDGMRGLAVFISDIRNCK
GPSTVTDLEETKR
ALDGYSK
LSTVASTDILATVLEEMPPFPER
QRAVDLLYAMCDR
VVHLLNDQHLGVVTAATSLITTLAQK
QSAALCLLRLYR
NPTFMGLALHCIANVGSREMAEAFAGEIPK
MPAVSKGDGMRGLAVFISDIR
SNAQQIVAEMLSYLETADYSIR
TSPDLVPMGDWTSRVVHLLNDQHLGVVTAATSLITTLAQK
LSTVASTDILATVLEEMPPFPERESSILAK
IVTSASTDLQDYTYYFVPAPWLSVK
RINKELANIR
YTEKQIGYLFISVLVNSNSELIR
LPITLNKFFQPTEMASQDFFQR
NFPNAIEHTLQWAR
FEVQGLQPNGEEMTLK
QNRYDGQVAVFGSDFQEK
ATLPSPDKLPGFK
LPGFKMYPIDFEK
FQEKLSK
LDQPMTEIVSR
YFLVGAGAIGCELLK
DNPGVVTCLDEAR
IYDDDFFQNLDGVANALDNIDAR
GLFGQLFCDFGEEMVLTDSNGEQPLSAMVSMVTK
AAVASLLQSVQVPEFTPK
NFPNAIEHTLQWARDEFEGLFK
ERLDQPMTEIVSRVSK
HQYYNQEWTLWDR
SLPASLVEPDFVMTDFAK
YDGQVAVFGSDFQEKLSK
QPAENVNQYLTDSK
QPAENVNQYLTDSKFVER
QFLDYFKTEHK
QFLFRPWDVTK
MSSSPLSK
ACSGKFMPIMQWLYFDALECLPEDK
EEDIGKNRAEVSQPR
NGFLNLALPFFGFSEPLAAPR
LAYVAAGDLAPINAFIGGLAAQEVMK
IIPAIATTTAAVVGLVCLELYK
FMPIMQWLYFDALECLPEDKEALTEEK
FMPIMQWLYFDALECLPEDK
NQVAMNPTNTIFDAKR
FEELNADLFRGTLEPVEK
GPAIGIDLGTTYSCVGV
NAVESYTYNIK
LSKDDIDRMVQEAER
MKEIAEAYLGGK
TFFPEEISSMVLTKMK
EIAEAYLGGK
TFFPEEISSMVLTKMKEIAEAYLGGK
IINEPTAAAIA
KFEDATVQSDMKHWPFR
GQIQEIVLVGGSTR
DDIDRMVQEAER
FEDATVQSDMKHWPFR
QATKDAGTITGLNVLR
DAGTITGLNVLRIINEPTAAAIAYGLDKK
EIAEAYLGGKVQSAVITVPAYFNDSQR
TLSSSTQASIEIDSLYEGVDFYTSITRAR
VAAKNAVESYTYNIK
DGKTLNDELEIIEGMK
DIGNIISDAMKK
RIQEITEQLDITTSEYEK
DIGNIISDAMK
TVIIEQSWGSPK
TLNDELEIIEGMKFDR
VGEVIVTKDDAMLLK
APGFGDNRKNQLK
ISSVQSIVPALEIANAHR
EGFEKISK
TALLDAAGVASLLTTAEAVVTEIPKEEK
TLNDELEIIEGMK
GYISPYFINTSK
TALLDAAGVASLLTTAEAVVTEIPK
ALMLQGVDLLADAVAVTMGPK
GQKCEFQDAYVLLSEK
NIGAKLVQDVANNTNEEAGDGTTTATVLAR
ILQSSSEVGYDAMLGDFVNMVEK
LVQDVANNTNEEAGDGTTTATVLAR
GVMLAVDAVIAELK
AHIEKRIQEITEQLDITTSEYEK
PAMTIAK
FDRGYISPYFINTSKGQK
GVMLAVDAVIAELKK
DGKTLNDELEIIEGMKFDR
GYISPYFINTSKGQKCEFQDAYVLLSEK
KISSVQSIVPALEIANAHRKPLVIIAEDVDGEALSTLVLNR
CEFQDAYVLLSEKKISSVQSIVPALEIANAHR
FDLGQDVIDFTGHALALYR
FQILEGPPESMGR
RFQILEGPPESMGR
SPYLYPLYGLGELPQGFAR
YIAIASTTVETAEPEKEVEPALELLEPIDQK
MLLYTEVTR
DWNVDLIPK
VPSTETEALASNLMGMFEK
NPYYGGESSSITPLEELYK
TFEGVDPQNTSMR
MLLYTEVTRYLDFK
NTNDANSCQIIIPQNQVNR
TDDYLDQPCLETINR
NTNDANSCQIIIPQNQ
MAGSAFDFENMKR
CILSHPIK
IICILSHPIK
LYSESLAR
KSDIYVCMISYAHNVAAQGK
MDEEYDVIVLGTGLTECILSGIMSVNGKK
YIAIASTTVET
LSAIYGGTYMLNKPVDDIIMENGK
KQNDVFGEADQ
DEEYDVIVLGTGLTECILSGIMSVNGK
KFDLGQDVIDFTGHALALYR
FVAISDLYEPIDDGSESQVFCSCSYDATTHFETTCNDIK
VPSTETEALASNLMGMFEKR
TYATAEPFIDAK
ASTAAPVASPAAPSPGSSGGGGF
VDNQHDFQDIASVVALTK
EMLSSTTYPVVVK
VLLVIDEPHTDWAK
TNTGSAMLEQIAMSDR
LGTEEFPLIDQTFYPNHK
ASGAPPGGQQR
ASTAAPVASPAAPSPGSSGGGGFFSSLSNAVK
LVIDEPHTDWAK
QTSQQPAGPPAQQRPPPQGGPPQPGPGPQR
VEQAEFSDLNLVAHANGGFSVDMEVLRNGVK
GSHSQSSSPGALTLGR
TNTGSAMLEQIAMSDRYK
QAGAPQATR
LWVDTCSEIFGGLDICAVEALHGK
QSRPVAGGPGAPPAARPPASPSPQR
DHIIEVVGSSMPLIGDHQDEDK
SLKPDFVLIR
TYATAEPFIDAKYDVR
LGTEEFPLIDQTFYPNHKEMLSSTTYPVVVK
QTTAAAAATFSEQVGGGSGGAGR
QPQRDASPGRGSHSQSSSPGALTLGR
KLGTEEFPLIDQTFYPNHK
IHGEIDIKVEQAEFSDLNLVAHANGGFSVDMEVLR
KIHGEIDIK
QTTAAAAATFSEQVGGGSGGAGRGGAAAR
YPIEHGIITNWDDMEK
KDLYANNVMSGGTTMYPGIADR
KDLYANNVMSGGTTMYPGIADRMQK
TALAPSTMK
DLYANNVMSGGTTMYPGIADR
APPER
PPER
IWHHTF
LCYVALDFENEMATAASSSSLEK
EITALAPS
IAPPER
FRCPETLFQPSFIGMESAGIHETTYNSIMKCDIDIR
IAVGSDADVVIWDPDKMK
GVNSFQVYMAYK
GPLVFGEPIAASLGTDGTHYWSK
EELEVLVQDK
MTVVWDK
SAADIIALAR
SIPHITSDR
IFNLYPR
NLHQSNFSLSGAQIDDNNPR
IVFEDGNISVSK
MVIPGGIDVNTYLQKPSQGMTSADDFFQGTK
AALAGGTTMIIDHVVPEPGSSLLTSFEK
STVEYNIFEGMECHGSPLVVISQGK
AAAFVTSPPLSPDPTTPDYLTSLLACGDLQVTGSGHCPYSTAQK
DLYQMSDSQLYEAFTFLK
KPFPEHLYQR
KGPLVFGEPIAASLGTDGTHYWSKNWAK
STVEYNIFEGMECHGSPLVVISQGKIVFEDGNISVSK
GMYDGPVYEVPATPKHAAPAPSAK
GMYDGPVYEVPATPKHAAPAPSAKSSPSK
ILEMGITGPEGHALSRPEELEAEAVFR
GLGAVILVHAENGDLIAQEQK
GGRIINDDQSFYADVYLEDGLIK
VFGLHSVSR
MLSLVGR
DPNIVGNEHYDVAR
VALVYGQMNEPPGAR
TVLIMELINNVAK
AHGGYSVFAGVGER
IMNVIGEPIDER
NVIGEPIDER
FLSQPFQVAEVFTGHMGK
IPVGPETLGR
IMDPNIVGNEHYDVAR
TIAMDGTEGLVR
LVLEVAQHLGESTVR
VVDLLAPYAK
IMDPNIVGNEHYDVARGVQK
VASASASGALR
GFQQILAGEYDHLPEQAFYMVGPIEEAVAK
SLQDIIAILGMDELSEEDKLTVSR
IPSAVGYQPTLATDMGTMQER
AHGGYSVFAGVGERTR
DQEGQDVLLFIDNIFR
GSITSVQAIYVPADDLTDPAPATTFAHLDATTVLSR
SLQDIIAILGMDELSEEDK
DYAAQASAAPKAGTATGR
IPSAVGYQPTLATDMGTMQERITTTKK
ETIKGFQQILAGEYDHLPEQAFYMVGPIEEAVAKADK
AAPAGVHPARDYAAQASAAPKAGTATGR
SNIDGTHIAK
ILLANFLAQTEALMK
TLASLSPETSLFIIASK
HFVALSTNTAK
VWFVSNIDGTHIAK
TFTTQETITNAETAK
EVMQMLVELAK
FVSNIDGTHIAK
SHDSSTNGLISFIK
VDGKDVMPEVNRVLDK
GVEAARDNMFSGSK
SNTPIKVDGKDVMPEVNR
EFGIDPQNMFEFWDWVGGR
EWFLEAAK
LLEWHR
SRGVEAARDNMFSGSK
SITDIINIGIGGSDLGPLMVTEALKPYSK
INYTENR
LTPFILGALIAMYEHK
NPQFQK
MAALTR
MAALTRNPQFQK
ELQAAGKSPEDLEK
FLEAAK
PEVNR
DPSAVAKHFVALSTNTAK
GMTTVDDFFQGTK
GNVVFGEPITASLGIDGTHYW
SAADLISQAR
SDLVIWDPDALK
FIPCSPFSDYVYK
GMYDGPVFDLTTTPK
IAVGSDSDLVIWDPDALK
AALAGGTTMIIDHVVPEPESSLTEAYEK
NLHQSGFSLSGTQVDEGVR
MADLHAVPR
IMLEDGNLHVTQGAGR
SASKR
GNVVFGEPITASLGIDGTHYWSKNWAK
NHQSVAEYNIFEGMELR
KGNVVFGEPITASLGIDGTHYWSK
QEVQSLSKEK
FIPCSPFSDYVYKR
TIEANGKMVIPGGIDVHTHFQMPYK
SAADLIS
APPGGR
MLEMGITGPEGHVLSRPEELEAEAVFR
AIGKDNFTAIPEGTNGVEER
VDFVTADKFDENAK
VFEWEAFAR
SLMDEVVKATSR
LGDVYVNDAFGTAHR
ITLPVDFVTADKFDENAK
YSLEPVAAELK
AEPAKIDAFR
ALESPERPFLAILGGAK
DCVGPEVENACANPAAGTVILLENLR
VNEMIIGGGMAFTFLK
GCITIIGGGDTATCCAK
VDFNVPMK
AHSSMVGVNLPQK
QIVWNGPVGVFEWEAFAR
SVVLMSHLGRPDGVPMPDK
SLMDEVVK
AAVPSIKFCLDNGAK
VLNNMEIGTSLYDEEGAK
TGQATVASGIPAGWMGLDCGTESSK
QIVWNGPVGVFEWEAFARGTK
DVLFLK
SLLGKDVLFLKDCVGPEVENACANPAAGTVILLENLR
YAEAVGRAKQIVWNGPVGVFEWEAFAR
YSLEPVAAELKSLLGKDVLFLK
VLPGVDALSNV
QQEGESRLNLVQR
VIGSGCNLDSAR
HRVIGSGCNLDSARFR
SLADELALVDVLEDK
KSADTLWDIQKDLK
LIASVADDEAAVPNNK
SADTLWDIQK
VIGSGCNLDSARFR
LKDDEVAQLR
IVADKDYSVTANSK
GEMMDLQHGSLFLQTPK
DTLWDIQK
DYSVTANSKIVVVTAGVRQQEGESR
HRVIGSGCNLDSAR
EVHKMVVDSAYEVIK
YSPDCTIIVVSNPVDILTYVTWK
SLADELALVDVLEDKLK
TSVINQK
SADTLWDIQKDLKDL
ITVVGVGQVGMACAISILGK
LSGLPK
NVNVFK
KSADTLWDIQK
GYTNWAIGLSVADLIESMLK
QAGSISMDLQLTNK
SQPDMAIMAVNTFVK
ALQVMTDFAIQFNR
LGAPISSGLSDLFDLTSGVGTLSGSYVAPK
DIANENEAQFQIR
KPTETQELVQQVLSLATQDSDNPDLR
APEVSQHVYQAYETILK
FMEMLSKDLDYYATLLKK
NSFGLAPAAPLQVHVPLSPNQTVEISLPLNTVGSVLK
YPNKYESVIATLCENLDSLDEPEAR
DCPLNTEAASNKLQSSNIFTVAK
DIANENEAQFQIRDCPLNTEAASNK
DLISDSNPMVVANAVAALSEIAESHPSSNLLDLNPQSINK
KVIASMTVGKDVSALFPDVVNCMQTDNLELK
LATLGGSQALGLDSEIGNFEVGKEFDALLINPR
EFDALLINPR
FVSEMLQK
IVFLEESSQQEK
QVVPFSSSV
NIEEVYVGGK
FTLSCTETLMSELGNIAK
STDVAEEVYTR
ASDSPIDLFYGDFVGDISEAVIQK
GTFVHSTWTCPMEVLR
FVSEMLQKNYPR
THDLYIQSHISENR
LATLGGSQALGLDSEIGNFEVGK
NYTDVYDKNNLLTNK
EEIEAVK
DHLLGVSDSGKIVFLEESSQQEKLAK
LAKEWCFKPCEIR
NGTTTACYFGTIHTDSSLILAEITDK
NNLLTNKTVMAHGCYLSEEELNIFSER
GASIAHCPNSNLSLSSGLLNVLEVLK
DHLLGVSDSGK
TVMAHGCYLSEEELNIFSERGASIAHCPNSNLSLSSGLLNVLEVLK
NGTTTACYFGTIHTDSSLILAEITDKFGQR
VCMDLNDTVPEYKETTEESVK
VAPDEHPILLTEAPLNPK
GIHETTFNSIMK
EIVTLAPSTMK
DLFANTVLSGGSTMYPGIADR
FRCPEAIFQPSFLGIESR
CPEAIFQPSFLGIESRGIHETTFNSIMK
AVFPSMVGRPR
CPEAIFQPSFLGIESR
KDLFANTVLSGGSTMYPGIADR
DLTDYLMKILTERGYNFTTTAER
AGFGGDDAPRAVFPSMVGRPR
SIQFVDWCPTGFK
AVFVDLEPTVIDEIR
AVFVDLEPTVIDEIRNGPYR
KLSDQCTGLQGFLVFHSFGGGTGSGFTSLLMER
LSDQCTGLQGFLVFHSFGGGTGSGFTSLLMER
YMACCLLYRGDVVPKDVNAAIAAIK
LSDQCTGLQGFLVFHSFGGGTGSGFTSLLMERLSVDYGK
LLVVYPWTQR
VITAFNDGLNHLDSLK
GTFASLSELHCDK
TAFNDGLNHLDSLK
LHVDPENFR
YFDSFGDLSSASAIMGNAK
DFTPAAQAAFQK
FASLSELHCDK
KVITAFNDGLNHLDSLK
TPAAQAAFQK
AAVSCLWGK
VNSDEVGGEALGR
AFNDGLNHLDSLK
LLGNMIVIVLGHHLGK
MVHLTDAEKAAVSCLWGK
LLVVYPWTQRYFDSFGDLSSASAIMGNAK
VIVLGHHLGK
VLGHHLGK
LLGNMIVIVLGHHLGKDFTPAAQAAFQK
LHVDP
IVLGHHLGK
GHHLGK
MIAEAIPELK
LTLYDIAHTPGVAADLSHIETR
PQDQLATLTGR
GCDVVVIPAGVPR
GYLGPEQLPDCLK
VAVLGASGGIGQPLSLLLK
ETECTYFSTPLLLGK
TIIPLISQCTPK
IQEAGTEVVK
AGAGSATLSMAYAGA
VDFPQDQLATLTGR
FVFSLVDAMNGK
ANTFVAELK
AKAGAGSATLSMAYAGAR
KGEDFVKNMK
ANVKGYLGPEQLPDCLK
ITPFEEK
AGAGSATLSMAYAGAR
ADLSHIETR
RSFSTSAQNNAK
GCDVVVIPAGVPRKPGMTR
SFSTSAQNNAK
ESLLFEGR
GAAMVTAVAYR
ATDCVGHDVATLLR
TTVGVDGSLYK
RAAQLCGAGMAAVVEK
FTTSDVAAIETDK
SANLVAATLGAILNR
LSDEILIDILTR
KEMKNGLSR
GDFIALDLGGSSFR
LPVGFTFSFPCR
SQNVSMESEVYDTPENIVHGSGSQLFDHVAECLGDFMEK
PELLTR
FTTSDVAAIETDKEGVQNAK
TDFDKVVDEYSLNSGK
QIEETLSHFR
QTSLDCGILITWTKGFK
MLPSYVR
TVCGVVSK
QRFEKMISGMYLGEIVR
FEKMISGMYLGEIVR
SANLVAATL
LVLGDNSLAIR
ESDSVLRVLSQMEK
NLDYVATSIHEAVTK
TPGTWSHITEQIGMFSFTGLNPK
IANDNSLNHEYLPILGLAEFR
QIAAVMQRR
APPSVFAQVPQAPPVLVFK
IGADFLGR
ITWSNPPAQGAR
INMCGLTTKNLDYVATSIHEAVTKIQ
FLFPFFDSAYQGFASGDLEK
QVEYLVNEK
VNLGVGAYR
DDPDPRKVNLGVGAYR
NTPIYVSSPTWENHNAVFSAAGFK
LGDNSLAIR
IANDNSLNHEYLPILGLAEFRSCASRLVLGDNSLAIR
APPSVFAQVPQA
PPVLVFK
RFLFPFFDSAYQGFASGDLEK
GLDLQGFLNDLENAPEFSIFVLHACAHNPTGTDPTPEQWK
VNLGVGAYRTDESQPWVLPVVRK
VGTKCCTLPEDQR
TPVSEHVTK
LPCVEDYLSAILNR
AADKDTCFSTEGPNLVTR
LSQTFPNADFAEITK
SLHTLFGDK
DDNPSLPPFERPEAEAMCTSFK
TVMDDFAQFLDTCCK
RPCFSALTVDETYVPK
DVFLGTFLYEYSR
VCLLHEKTPVSEHVTKCCSGSLVER
LQTCCDKPLLK
TCVADESAANCDK
PNLR
YNDLGEQHFK
CCAEANPPACYGTVLAEFQPLVEEPK
LCAIPNLRENYGELADCCTK
AFKAWAVARLSQTFPNADFAEITK
AWAVARLSQTFPNADFAEITKLATDLTK
AELAKYMCENQATISSKLQTCCDKPLLK
TCVADESAANCDKSLHTLFGDK
LGEYGFQNAILVRYTQKAPQVSTPTLVEAAR
ASAELALGENNEVLK
IAATILTSPDLR
TCGFDFSGALEDISK
EYLPIGGLAEFCK
VGASFLQR
IPEQSVLLLHACAHNPTGVDPRPEQWK
DTNSKKMNLGVGAYR
MNLGVGAYR
DAWAVRHFIEQGINVCLCQSYAK
KQWLQEVKGMADR
NLDKEYLPIGGLAEFCK
QWLQEVKGMADR
AEAQIAAKNLDK
DDNGKPYVLPSVR
ILSGMAAAFHPGLAAAASAR
HFIEQGINVCLCQSYAK
HFIEQGINVCLCQSYAKNMGLYGER
GMADRIISMRTQLVSNLK
NLFAFFDMAYQGFASGDGDKDAWAVR
QWLQEVKGMADRIISMR
KNLFAFFDMAYQGFASGDGDKDAWAVR
DLGTDSQIFISR
VLHMDQNPYYGGESASITPLEDLYK
KSDIYVCMISFAHNVAAQGK
FDLGQDVIDFTGHSLALYR
VLHMDQNPYYGGESASITPLEDLYKR
VPSTEAEALASSLMGLFEK
TDDYLDQPCCETINRIK
FLVYVANFDEKDPR
MLLFTEVTR
KFLVYVANFDEKDPR
FLMANGQLVKMLLFTEVTR
VIEGSFVYK
CKQLICDPSYVKDR
NEEYDVIVLGTGLTECILSGIMSVNGK
SDIYVCMISFAHNVAAQGK
SEGEIARCKQLICDPSYVK
YMDFKVIEGSFVYKGGK
AVCKATTHEVMGPK
GDIPDLTQAPSSLMETLEQHLNTLEGK
NTLFNLSNFLDK
YLNEKAFSYRQMAFDFAR
VAEQVGIDKGDIPDLTQAPSSLMETLEQHLNTLEGK
GASPVPESSLTADLLSVDAFAAPSPASTASPAK
FIQYLASR
GLGSDLDSSLASLVGNLGISGTTSK
SSPATTVTSPNSTPAK
FFEMKKGQCK
ALVTTHHLMVHGNERFIQYLASR
DPLADLNIK
KHLDYLIQATNETNVNIPQMADTLFER
DPLADLNIKDFL
SGSHGYDMSTFIR
DALEIYK
QYLASR
DLIKLFACYNDGVINLLEKFFEMK
MSGQTLTDRIAAAQYSVTGSAVAR
DLIKLFACYNDGVINLLEK
GLGSDLDSSLASLVGNLGISGTTSKK
VPYSELGGKTLVMAVYDFDR
NAINMKDVK
MDVGGLSDPYVK
TLVMAVYDFDRFSK
TLNPVFNEQFTFK
DQALKDDDAETGLTDGEEK
VPMNTVDFGHVTEEWR
PVFNEQFTFK
HDIIGEFK
VPYSELGGK
HWSDMLANPR
VSASRPEALAAPVTTVATLVPHNATEPASPGEGK
IHLMQNGK
VFVGYNSTGAELR
NTLNPYYNESFSFEVPFEQIQK
DLQSAEKEEQEK
DVKDLGKTMK
YSELGGK
DQALKDDDAETGLTDGEEKEEPKEEEK
EKGGKNAINMK
HDIIGEFKVPMNTVDFGHVTEEWR
MASTFIGNSTAIQELFK
RISEQFSAMFR
RISEQFSAMFRR
EIVHIQAGQCGNQIGTK
YLTVATVFRGPMSMK
GPMSMKEVDEQMLAIQNK
SGPFGQLFRPDNFIFGQTGAGNNWAK
TPSALAILENANVLAR
MPHSYPALSAEQK
YASICQQNGIVPIVEP
GVVPLAGTDGETTTQGLDGLLER
DNAGAATEEFIK
YSPEEIAMATVTALR
GILAADESVGSMAK
CIGGVIFFHETLYQK
RAEMNGLAAQGR
QVLFSADDR
YEGSGDGGAAAQSLYIANHAY
GQRDNAGAATEEFIK
TVPPAVPGVTFLSGGQSEEEASLNLNAINR
CPLPRPWALTFSYGRALQASALNAWR
PIVEPEILPDGDHDLKR
DNAGAATEEFIKR
ELSDIALRIVTPGK
VLLVVDEPHTDWAK
FPLIEQTYYPNHR
SFRPDFVLIRQHAFGMAENEDFR
VENHYDFQDIASVVALTQTYATAEPFIDAK
TPALSPQRPLTTQQPQSGTLKEPDSSK
RPPPAQAPAPQPAPQPAPTPSVGSSFFSSLSQAVK
ILGDYDIK
QTAASAGLVDAPAPSAASR
DYIFEVMDCSMPLIGEHQVEDR
SSANEDEAKAETIRSLR
TPALSPQRPLTTQQPQSGTLK
SFRPDFVLIR
MNQLLSR
GQPQGMQPPGK
DGKDYIFEVMDCSMPLIGEHQVEDR
VKVENHYDFQDIASVVALTQTYATAEPFIDAK
VEQAEFSELNLVAHADGTYAVDMQVLR
TSISGNWKTNTGSAMLEQIAMSDR
GLVYETSVLDPDEGIR
SVLDPDEGIR
LDWSHNFTNMLGYTDPQFTELMR
PGYGHAVLR
AALPSHVVTMLDNFPTNLHPMSQLSAAITALNSESNFAR
EGSSIGAIDSR
GLVYETSVLDPDEGIRFR
ALGVLAQLIWSR
GYSIPECQKMLPK
TLNSGR
YGHAVLR
LPCVAAK
NLYREGSSIGAIDSR
GMKGLVYETSVLDPDEGIR
AKYWELIYEDCMDLIAKLPCVAAK
FRGYSIPECQKMLPK
GGEEPLPEGLFWLLVTGQMPTEEQVSWLSR
DYIWNTLNSGRVVPGYGHAVLR
AKGGEEPLPEGLFWLLVTGQMPTEEQVSWLSR
YWELIYEDCMDLIAK
DSTLIMQLLR
DICNDVLSLLEK
FLIPNASQPESK
SVTEQGAELSNEER
TAFDEAIAELDTLSEESYK
NLLSVAYK
AKLAEQAER
GIVDQSQQAYQEAFEISK
YLAEVAAGDDK
MKGDYYRYLAEVAAGDDK
YLAEVAAGDDKK
TAFDEAIAELDTLSEESYKDSTLIMQLLR
TAFDEAIAELDTL
IETELR
EMQPTHPIR
IETELRDICNDVLSLLEK
LGLALNFSVFYYEILNSPEKACSLAK
TLSEESYK
TAFDEAIAE
AVTEQGHELSNEER
TAFDEAIAELDTLNEESYK
YLSEVASGENK
TEQGHELSNEER
QTTVSNSQQAYQEAFEISK
VISSIEQK
AVTEQGHELSNEERNLLSVAYK
IEAELQDICNDVLELLDK
TAFDEAIAELDTLNEESYKDSTLIMQLLR
EKIEAELQDICNDVLELLDK
YDDMAAAMKAVTEQGHELSNEER
MKGDYFRYLSEVASGENK
YLSEVASGENKQTTVSNSQQAYQEAFEISK
AKLAEQAERYDDMAAAMK
NVTELNEPLSNEER
ELEAVCQDVLSLLDNYLIK
YLAEVATGEK
TAFDDAIAELDTLNEDSYK
YLAEVATGEKR
LGLALNYSVFYYEIQNAPEQACHLAK
EHMQPTHPIR
RATVVESSEKAYSEAHEISK
ATVVESSEK
TAFDDAIAELDTLNEDSYKDSTLIMQLLR
ELEAVCQDVLSLLDNYLIKNCSETQYESKVFYLK
NVTELNEPLSNEERNLLSVAYK
NCSETQYESKVFYLK
ELEAVCQDVLSLL
ARLAEQAERYDDMAAAMK
IEMVRAYREK
QLIVGVNK
YYITIIDAPGHR
EGNASGVSLLEALDTIL
LPLQDVYK
YDEIVKEVSAYIK
VETGILRPGMVVTFAPVNITTEVK
EGNASGVSLLEALDTILPPTRPTDKPLR
QLIVGVNKMDSTEPAYSEKR
IGYNPATVPFVPISGWHGDNMLEPSPNMPWFK
NMITGTSQADCAVLIVAAGVGEFEAGISK
RYDEIVK
ADPPQEAAQFTSQVIILNHPGQISAGYSPVIDCHTAHIACK
SLKSGDAAIVEMVPGKPMCVESFSQYPPLGR
KEGNASGVSLLEALDTILPPTRPTDKPLR
TIEKFEKEAAEMGK
STTTGHLIYK
DIRRGNVCGDSK
PPTRPTDKPLR
FETTKYYITIIDAPGHR
CDIDIRKDLYANNVLSGGTTMYPGIADR
AGPAWMVR
GHDSVFVAPVK
DPGPVIPEPEK
NEGHEEKPLPP
QIREEVASTVSSSYR
GQDPLVPAPTKDQGPTAPDPLK
RPQSQERGPMQLSADARDPEGAGGAGVLAAGK
ATGPAPGPSVDR
YSEATEHPGAPPQPPAPLQPALAPPSR
KDQHVSIMASLK
DPGPVIPEPEKDR
ACCIARFWNQLDK
AGPAWMVTR
SGLGLGAASASTSGSGPADSVMR
APTVPER
MVHETSYSAQFK
TEGHEETPLPPAQSQTQEGGPAAGK
AWKVQRPEPSCRPR
RSEGHEQTPAAHAQGTGPEGGK
REDLLNNVAR
IDIPSFDWPIAPFPR
LACSSQKNLHLFIPGSR
IFNTWLGDPSK
TVAGIIVEPIQSEGGDNHASDDFFR
NLHLFIPGSR
MLDLYSQISSVPIGYNHPALAK
NLLLAEVINIIK
RLACSSQK
EEFRPSAPYR
GILPPENFVDK
TLLTGLLDLQAQYPQFISR
EDLLNNVAR
CLEEVEDLIVK
GRGTFCSFDTPDEAIRNK
YISQAAAKVDIEFDYDGPLMK
FWAHEHWGLDDPADVMTFSKK
LVQQPQNASTFINRPALGILPPENFVDKLQESLMSVAPR
MMTGGFFHKEEFRPSAPYRIFNTWLGDPSK
FTMELAK
HLLMSVQESLER
ALASLMTYK
IIAEGANGPTTPEADKIFLER
HGGTIPVVPTAEFQDR
CAVVDVPFGGAK
IIAEGANGPTTPEADK
AGPAALGSAAADSAALLGWAR
VYEGSILEADCDILIPAASEK
SVDEVK
ELEDFKLQHGSILGFPKAK
GGIRYSTDVSVDEVK
RDDGSWEVIEGYR
CVGVGESDGSIWNPDGIDPK
YERDSNYHLLMSVQESLER
VYEGSILEADCDILIPAASEKQLTK
TFVVQGFGNVGLHSMR
HYSEAAADREDDPNFFKMVEGFFDR
TAAYVNAIEK
FSMVQVWPVR
FKDPVKDGEAK
VGSHITGGDIYGIVNENSLIK
HFTEFVPLR
EILQEEEDLAEIVQLVGK
ADYAQLLEDMQNAFR
WEFIPSK
LAEMPADSGYPAYLGAR
VGHSELVGEIIRLEGDMATIQVYEETSGVSVGDPVLR
LPANHPLLTGQR
TGKPLSVELGPGIMGAIFDGIQRPLSDISSQTQSIYIPR
LASFYERAGR
VLDALFPCVQGGTTAIPGAFGCGK
VGSHITGGDIYGIVNENSLIKHK
LASFYER
NRGSVTYIAPPGNYDASDVVLELEFEGVKEK
GNEMSEVLRDFPELTMEVDGK
ESTFGYVHGVSGPVVTACDMAGAAMYELVRVGHSELVGEIIR
RTALVANTSNMPVAAR
LNLVQRNVNIFK
VHPISTMIK
VTLTPEEEAR
QVVDSAYEVIK
DQLIVNLLK
DLADELALVDVMEDK
SLNPELGTDADKEQWK
LLIVSNPVDILTYVAWK
AIGLSVADLAESIMK
SLNPELGTDADK
GEMMDLQHGSLFLK
GLYGINEDVFLSVPCILGQNGISDVVK
EQWK
DQLIVNLLKEEQAPQNK
RVHPISTMIK
ILGSKLSSWQR
DACFTSLMNTLMTSLPSLVQQQGR
CEQSLLKEPQK
IFDAVGFTFPNR
LAHACGSDWIPVGSSGSKFLALLVNLACVEVR
RIFDAVGFTFPNR
FELCQLLPLFLPPTTVPPECHR
SCCDLAAAGQLGK
LQAGEETASHYR
EVCQLLPFLVR
NPALKLAARLAHACGSDWIPVGSSGSK
AGEETASHYR
TLYEEAEEASDISQQVANLAISPTTPGPSWPGDALR
GFFAAAILFLSQSHVAR
ILGAWLAE
EAKNDSEQFAALLLVTKAVK
DACFTSLMNTLMTSLPSLVQQQGRLLLAANVATLGLLMAR
MSCCDLAAAGQLGKAGIMASDCEPALNQAESR
LICCDILDVLDK
AASDIAMTELPPTHPIR
AAFDDAIAELDTLSEESYK
EAAENSLVAYK
EDLVYQAKLAEQAER
VAGMDVELTVEER
KVAGMDVELTVEER
EDLVYQAK
PPTHPIR
AAFDDAIAELDTLSEESYKDSTLIMQLLR
LGLALNFSVFYYEILNSPDRACRLAK
VFYYK
MDDREDLVYQAKLAEQAER
MIREYRQMVETELK
PAANTGESK
LGLALNFSVFYYEILNSPDRACR
NCNDFQYESKVFYLKMK
VTELNEPLSNEDR
AVTELNEPLSNEDR
ELETVCNDVLALLDK
YLAEVASGEKK
NSVVEASEAAYKEAFEISK
NSVVEASEAAYK
YLAEVASGEK
KNSVVEASEAAYK
ARLAEQAERYDDMASAMK
IEKELETVCNDVLALLDK
QAFDDAIAELDTLNEDSYKDSTLIMQLLR
VISSIEQKTMADGNEKK
EKIEKELETVCNDVLALLDK
FLIKNCNDFQYESKVFYLK
MAGDPVANVR
IGPILDNSTLQSEVKPILEK
YFAQEALTVLSLA
RLAGGDWFTSR
VRYMVADK
LAGGDWFTSR
DNTIEHLLPLFLAQLK
TDLVPAFQNLMK
LNSLCMAWLVDHVYAIR
NEDVQLR
SEIIPMFSNLASDEQDSVR
FTELQK
SALASVIMGLSPILGK
PLFLAQLK
DNTIEHLLPLFLAQLKDECPEVR
MTTLFCINVLSEVCGQDITTK
DNTIEHLL
LAIIEYMPLLAGQLGVEFFDEK
FVEGLPINDFSR
VIVVGNPANTNCLTASK
GEFITTVQQR
NVIIWGNHSSTQYPDVNHAK
LQGKEVGVYEALKDDSWLK
LGVTADDVK
EVGVYEALKDDSWLK
YEALKDDSWLK
DLDVAVLVGSMPR
TWKFVEGLPINDFSR
MDLTAKELTEEK
EVGVYEALK
VYEALKDDSWLK
AIADHIR
SAPSIPKENFSCLTR
LPINDFSR
PSIPK
VLVTGAAGQIAYSLLYSIGNGSVFGK
ELASQPDVDGFLVGGASLKPEFVDIINAK
VVLAYEPVWAIGTGKTATPQQAQEVHEK
IIYGGSVTGATCK
VTNGAFTGEISPGMIK
HVFGESDELIGQK
FFVGGNWK
SNVNDGVAQSTR
DLGATWVVLGHSER
TATPQQAQEVHEK
RHVFGESDELIGQK
EAGITEKVVFEQTK
FFVGGNWKMNGRK
PVWAIGTGK
KFFVGGNWK
PDVDGFLVGGASLKPEFVDIINAK
VVLGHSER
IIYGGSVTGATCKELASQPDVDGFLVGGASLKPEFVDIINAKQ
WAIGTGK
EESESVLTLK
LFEVGGSPANTR
ITSFEEAKGLDR
MPPRRDAMPSDANLNSINK
YLFLGDYVDR
HLTEYFTFKQECK
HLTEYFTFK
QTLQSATVEAIEADEAIK
FKEPPAYGPMCDILWSDPLEDFGNEK
GCSYFYSYPAVCDFLQHNNLLSILR
RDAMPSDANLNSINK
ITSFEEAK
SQTTGFPSLITIFSAPNYLDVYNNK
VYDACMDAFDCLPLAALMNQQFLCVHGGLSPEINTLDDIR
AIGKMAR
DGKPR
QEKNLLDIDAPVTVCGDIHGQFFDLMK
AHLMKEGRLEESVALR
GVVDSEDIPLNLSR
YSNFVSFPLYLNGKR
YIAQAYDKPR
NIYYLCAPNRHLAEHSPYYEAMK
INTLQAIWMMDPK
LDTHPAMVTVLEMGAAR
ELISNASDALEK
AFLEALQNQAETSSK
EEESLHSIISNTEAVR
GPTQSLASGISAGQLYSTQAAEDKEEESLHSIISNTEAVR
TDAPLNIR
IIGQFGVGFYSAFMVADKVEVYSR
IIIHLKSDCKDFASESR
SLYSEKEVFIRELISNASDALEK
MQAGTRNIYYLCAPNR
LVCEGQVLPEMEIHLQTDAKK
GTITIQDTGIGMTQEELVSNLGTIAR
DLLLDPAWEK
KAGTQIENIEEDFR
RDQALTEEHAR
AGTQIENIEEDFRDGLK
VGWEQLLTTIAR
LASDLLEWIR
ISIEMHGTLEDQLSHLRQYEK
FAIQDISVEETSAKEGLLLWCQR
ASFNHFDRDHSGTLGPEEFK
[truncated: 1,596 more rows]

## Sheet: Sheet_2_Protein_Identification
Sheet S2. Complete list of proteins identified in the mPFC of males and females
Accession	Description	Male	Female
A2AQ07	Tubulin beta-1 chain OS=Mus musculus OX=10090 GN=Tubb1 PE=1 SV=1	X	X
A2AVA0;A2AVA0-2	Sushi_ von Willebrand factor type A_ EGF and pentraxin domain-containing protein 1 OS=Mus musculus OX=10090 GN=Svep1 PE=1 SV=1	X	X
B2RSH2	Guanine nucleotide-binding protein G(i) subunit alpha-1 OS=Mus musculus OX=10090 GN=Gnai1 PE=1 SV=1	X	X
D3Z7P3;D3Z7P3-2	Glutaminase kidney isoform_ mitochondrial OS=Mus musculus OX=10090 GN=Gls PE=1 SV=1	X	X
E9Q784	Zinc finger CCCH domain-containing protein 13 OS=Mus musculus OX=10090 GN=Zc3h13 PE=1 SV=1	X	X
E9Q912-3;E9Q912;E9Q912-2	Isoform 3 of Rap1 GTPase-GDP dissociation stimulator 1 OS=Mus musculus OX=10090 GN=Rap1gds1	X	X
O08553	Dihydropyrimidinase-related protein 2 OS=Mus musculus OX=10090 GN=Dpysl2 PE=1 SV=2	X	X
O08585	Clathrin light chain A OS=Mus musculus OX=10090 GN=Clta PE=1 SV=2	X	X
O08599;O08599-2	Syntaxin-binding protein 1 OS=Mus musculus OX=10090 GN=Stxbp1 PE=1 SV=2	X	X
O08709	Peroxiredoxin-6 OS=Mus musculus OX=10090 GN=Prdx6 PE=1 SV=3	X	X
O35098	Dihydropyrimidinase-related protein 4 OS=Mus musculus OX=10090 GN=Dpysl4 PE=1 SV=1	X	X
O35295	Transcriptional activator protein Pur-beta OS=Mus musculus OX=10090 GN=Purb PE=1 SV=3	X	X
O35526	Syntaxin-1A OS=Mus musculus OX=10090 GN=Stx1a PE=1 SV=3	X	X
O35643	AP-1 complex subunit beta-1 OS=Mus musculus OX=10090 GN=Ap1b1 PE=1 SV=2	X	X
O35963	Ras-related protein Rab-33B OS=Mus musculus OX=10090 GN=Rab33b PE=1 SV=1	X	X
O54983	Ketimine reductase mu-crystallin OS=Mus musculus OX=10090 GN=Crym PE=1 SV=1	X	X
O55042;O55042-2	Alpha-synuclein OS=Mus musculus OX=10090 GN=Snca PE=1 SV=2	X	X
O55131;Q9DA97	Septin-7 OS=Mus musculus OX=10090 GN=Septin7 PE=1 SV=1	X	X
O70250	Phosphoglycerate mutase 2 OS=Mus musculus OX=10090 GN=Pgam2 PE=1 SV=3	X	X
O70456	14-3-3 protein sigma OS=Mus musculus OX=10090 GN=Sfn PE=1 SV=2	X	X
O88342	WD repeat-containing protein 1 OS=Mus musculus OX=10090 GN=Wdr1 PE=1 SV=3	X	X
O88569;O88569-2;O88569-3	Heterogeneous nuclear ribonucleoproteins A2/B1 OS=Mus musculus OX=10090 GN=Hnrnpa2b1 PE=1 SV=2	X	X
O88712;O88712-2;O88712-3	C-terminal-binding protein 1 OS=Mus musculus OX=10090 GN=Ctbp1 PE=1 SV=2	X	X
O88935;O88935-1;O88935-3	Synapsin-1 OS=Mus musculus OX=10090 GN=Syn1 PE=1 SV=2	X	X
O89053	Coronin-1A OS=Mus musculus OX=10090 GN=Coro1a PE=1 SV=5	X	X
P0DP27;P0DP26;P0DP28;Q9D6P8	Calmodulin-2 OS=Mus musculus OX=10090 GN=Calm2 PE=1 SV=1	X	X
P00920	Carbonic anhydrase 2 OS=Mus musculus OX=10090 GN=Ca2 PE=1 SV=4	X	X
P01831	Thy-1 membrane glycoprotein OS=Mus musculus OX=10090 GN=Thy1 PE=1 SV=1	X	X
P01942	Hemoglobin subunit alpha OS=Mus musculus OX=10090 GN=Hba PE=1 SV=2	X	X
P02088;P02089	Hemoglobin subunit beta-1 OS=Mus musculus OX=10090 GN=Hbb-b1 PE=1 SV=2	X	X
P02104	Hemoglobin subunit epsilon-Y2 OS=Mus musculus OX=10090 GN=Hbb-y PE=1 SV=2	X	X
P02301;P84244	Histone H3.3C OS=Mus musculus OX=10090 GN=H3-5 PE=3 SV=3	X	X
P05063	Fructose-bisphosphate aldolase C OS=Mus musculus OX=10090 GN=Aldoc PE=1 SV=4	X	X
P05064	Fructose-bisphosphate aldolase A OS=Mus musculus OX=10090 GN=Aldoa PE=1 SV=2	X	X
P05201	Aspartate aminotransferase_ cytoplasmic OS=Mus musculus OX=10090 GN=Got1 PE=1 SV=3	X	X
P05202	Aspartate aminotransferase_ mitochondrial OS=Mus musculus OX=10090 GN=Got2 PE=1 SV=1	X	X
P05214	Tubulin alpha-3 chain OS=Mus musculus OX=10090 GN=Tuba3a PE=1 SV=1	X	X
P06151	L-lactate dehydrogenase A chain OS=Mus musculus OX=10090 GN=Ldha PE=1 SV=3	X	X
P06745	Glucose-6-phosphate isomerase OS=Mus musculus OX=10090 GN=Gpi PE=1 SV=4	X	X
P06837	Neuromodulin OS=Mus musculus OX=10090 GN=Gap43 PE=1 SV=1	X	X
P07724	Albumin OS=Mus musculus OX=10090 GN=Alb PE=1 SV=3	X	X
P07759	Serine protease inhibitor A3K OS=Mus musculus OX=10090 GN=Serpina3k PE=1 SV=2	X	X
P07901	Heat shock protein HSP 90-alpha OS=Mus musculus OX=10090 GN=Hsp90aa1 PE=1 SV=4	X	X
P08113	Endoplasmin OS=Mus musculus OX=10090 GN=Hsp90b1 PE=1 SV=2	X	X
P08228	Superoxide dismutase [Cu-Zn] OS=Mus musculus OX=10090 GN=Sod1 PE=1 SV=2	X	X
P08249	Malate dehydrogenase_ mitochondrial OS=Mus musculus OX=10090 GN=Mdh2 PE=1 SV=3	X	X
P08752	Guanine nucleotide-binding protein G(i) subunit alpha-2 OS=Mus musculus OX=10090 GN=Gnai2 PE=1 SV=5	X	X
P09041	Phosphoglycerate kinase 2 OS=Mus musculus OX=10090 GN=Pgk2 PE=1 SV=4	X	X
P09411	Phosphoglycerate kinase 1 OS=Mus musculus OX=10090 GN=Pgk1 PE=1 SV=4	X	X
P10126	Elongation factor 1-alpha 1 OS=Mus musculus OX=10090 GN=Eef1a1 PE=1 SV=3	X	X
P10630;P10630-2	Eukaryotic initiation factor 4A-II OS=Mus musculus OX=10090 GN=Eif4a2 PE=1 SV=2	X	X
P10637;P10637-2;P10637-6	Microtubule-associated protein tau OS=Mus musculus OX=10090 GN=Mapt PE=1 SV=3	X	X
P10637-5;P10637-3;P10637-4	Isoform Tau-D of Microtubule-associated protein tau OS=Mus musculus OX=10090 GN=Mapt	X	X
P10649;P15626	Glutathione S-transferase Mu 1 OS=Mus musculus OX=10090 GN=Gstm1 PE=1 SV=2	X	X
P11499	Heat shock protein HSP 90-beta OS=Mus musculus OX=10090 GN=Hsp90ab1 PE=1 SV=3	X	X
P11798;P11798-2	Calcium/calmodulin-dependent protein kinase type II subunit alpha OS=Mus musculus OX=10090 GN=Camk2a PE=1 SV=2	X	X
P12023;P12023-2;P12023-3	Amyloid-beta precursor protein OS=Mus musculus OX=10090 GN=App PE=1 SV=3	X	X
P12382	ATP-dependent 6-phosphofructokinase_ liver type OS=Mus musculus OX=10090 GN=Pfkl PE=1 SV=4	X	X
P12658	Calbindin OS=Mus musculus OX=10090 GN=Calb1 PE=1 SV=2	X	X
P12960	Contactin-1 OS=Mus musculus OX=10090 GN=Cntn1 PE=1 SV=1	X	X
P14094	Sodium/potassium-transporting ATPase subunit beta-1 OS=Mus musculus OX=10090 GN=Atp1b1 PE=1 SV=1	X	X
P14152	Malate dehydrogenase_ cytoplasmic OS=Mus musculus OX=10090 GN=Mdh1 PE=1 SV=3	X	X
P14211	Calreticulin OS=Mus musculus OX=10090 GN=Calr PE=1 SV=1	X	X
P15105	Glutamine synthetase OS=Mus musculus OX=10090 GN=Glul PE=1 SV=6	X	X
P15532	Nucleoside diphosphate kinase A OS=Mus musculus OX=10090 GN=Nme1 PE=1 SV=1	X	X
P16125	L-lactate dehydrogenase B chain OS=Mus musculus OX=10090 GN=Ldhb PE=1 SV=2	X	X
P16546;P16546-2	Spectrin alpha chain_ non-erythrocytic 1 OS=Mus musculus OX=10090 GN=Sptan1 PE=1 SV=4	X	X
P16627	Heat shock 70 kDa protein 1-like OS=Mus musculus OX=10090 GN=Hspa1l PE=1 SV=4	X	X
P16858	Glyceraldehyde-3-phosphate dehydrogenase OS=Mus musculus OX=10090 GN=Gapdh PE=1 SV=2	X	X
P17156	Heat shock-related 70 kDa protein 2 OS=Mus musculus OX=10090 GN=Hspa2 PE=1 SV=2	X	X
P17182	Alpha-enolase OS=Mus musculus OX=10090 GN=Eno1 PE=1 SV=3	X	X
P17183	Gamma-enolase OS=Mus musculus OX=10090 GN=Eno2 PE=1 SV=2	X	X
P17426;P17426-2	AP-2 complex subunit alpha-1 OS=Mus musculus OX=10090 GN=Ap2a1 PE=1 SV=1	X	X
P17427	AP-2 complex subunit alpha-2 OS=Mus musculus OX=10090 GN=Ap2a2 PE=1 SV=2	X	X
P17710;P17710-3;P17710-4;P17710-2	Hexokinase-1 OS=Mus musculus OX=10090 GN=Hk1 PE=1 SV=3	X	X
P17742	Peptidyl-prolyl cis-trans isomerase A OS=Mus musculus OX=10090 GN=Ppia PE=1 SV=2	X	X
P17751;P17751-2	Triosephosphate isomerase OS=Mus musculus OX=10090 GN=Tpi1 PE=1 SV=5	X	X
P17879;Q61696	Heat shock 70 kDa protein 1B OS=Mus musculus OX=10090 GN=Hspa1b PE=1 SV=3	X	X
P18760	Cofilin-1 OS=Mus musculus OX=10090 GN=Cfl1 PE=1 SV=3	X	X
P18872	Guanine nucleotide-binding protein G(o) subunit alpha OS=Mus musculus OX=10090 GN=Gnao1 PE=1 SV=3	X	X
P19157;P46425	Glutathione S-transferase P 1 OS=Mus musculus OX=10090 GN=Gstp1 PE=1 SV=2	X	X
P19639	Glutathione S-transferase Mu 3 OS=Mus musculus OX=10090 GN=Gstm3 PE=1 SV=2	X	X
P20029	Endoplasmic reticulum chaperone BiP OS=Mus musculus OX=10090 GN=Hspa5 PE=1 SV=3	X	X
P20357	Microtubule-associated protein 2 OS=Mus musculus OX=10090 GN=Map2 PE=1 SV=2	X	X
P21550	Beta-enolase OS=Mus musculus OX=10090 GN=Eno3 PE=1 SV=3	X	X
P23506;P23506-2	Protein-L-isoaspartate(D-aspartate) O-methyltransferase OS=Mus musculus OX=10090 GN=Pcmt1 PE=1 SV=3	X	X
P26443	Glutamate dehydrogenase 1_ mitochondrial OS=Mus musculus OX=10090 GN=Glud1 PE=1 SV=1	X	X
P26638	Serine--tRNA ligase_ cytoplasmic OS=Mus musculus OX=10090 GN=Sars1 PE=1 SV=3	X	X
P26645	Myristoylated alanine-rich C-kinase substrate OS=Mus musculus OX=10090 GN=Marcks PE=1 SV=2	X	X
P26883	Peptidyl-prolyl cis-trans isomerase FKBP1A OS=Mus musculus OX=10090 GN=Fkbp1a PE=1 SV=2	X	X
P27600	Guanine nucleotide-binding protein subunit alpha-12 OS=Mus musculus OX=10090 GN=Gna12 PE=1 SV=3	X	X
P27773	Protein disulfide-isomerase A3 OS=Mus musculus OX=10090 GN=Pdia3 PE=1 SV=2	X	X
P28652	Calcium/calmodulin-dependent protein kinase type II subunit beta OS=Mus musculus OX=10090 GN=Camk2b PE=1 SV=2	X	X
P28663	Beta-soluble NSF attachment protein OS=Mus musculus OX=10090 GN=Napb PE=1 SV=2	X	X
P30275	Creatine kinase U-type_ mitochondrial OS=Mus musculus OX=10090 GN=Ckmt1 PE=1 SV=1	X	X
P31938	Dual specificity mitogen-activated protein kinase kinase 1 OS=Mus musculus OX=10090 GN=Map2k1 PE=1 SV=2	X	X
P34884	Macrophage migration inhibitory factor OS=Mus musculus OX=10090 GN=Mif PE=1 SV=2	X	X
P35276	Ras-related protein Rab-3D OS=Mus musculus OX=10090 GN=Rab3d PE=1 SV=1	X	X
P35279;P35279-2;P61294	Ras-related protein Rab-6A OS=Mus musculus OX=10090 GN=Rab6a PE=1 SV=4	X	X
P35486	Pyruvate dehydrogenase E1 component subunit alpha_ somatic form_ mitochondrial OS=Mus musculus OX=10090 GN=Pdha1 PE=1 SV=1	X	X
P35700;O08807	Peroxiredoxin-1 OS=Mus musculus OX=10090 GN=Prdx1 PE=1 SV=1	X	X
P35802	Neuronal membrane glycoprotein M6-a OS=Mus musculus OX=10090 GN=Gpm6a PE=1 SV=1	X	X
P35917	Vascular endothelial growth factor receptor 3 OS=Mus musculus OX=10090 GN=Flt4 PE=1 SV=1	X	X
P38647	Stress-70 protein_ mitochondrial OS=Mus musculus OX=10090 GN=Hspa9 PE=1 SV=3	X	X
P39053;P39053-5;P39053-6	Dynamin-1 OS=Mus musculus OX=10090 GN=Dnm1 PE=1 SV=2	X	X
P39053-3	Isoform 3 of Dynamin-1 OS=Mus musculus OX=10090 GN=Dnm1	X	X
P39053-4	Isoform 4 of Dynamin-1 OS=Mus musculus OX=10090 GN=Dnm1	X	X
P40124	Adenylyl cyclase-associated protein 1 OS=Mus musculus OX=10090 GN=Cap1 PE=1 SV=4	X	X
P40142	Transketolase OS=Mus musculus OX=10090 GN=Tkt PE=1 SV=1	X	X
P42669	Transcriptional activator protein Pur-alpha OS=Mus musculus OX=10090 GN=Pura PE=1 SV=1	X	X
P43006;P43006-2;P43006-3	Excitatory amino acid transporter 2 OS=Mus musculus OX=10090 GN=Slc1a2 PE=1 SV=1	X	X
P45591	Cofilin-2 OS=Mus musculus OX=10090 GN=Cfl2 PE=1 SV=1	X	X
P46096	Synaptotagmin-1 OS=Mus musculus OX=10090 GN=Syt1 PE=1 SV=1	X	X
P46460	Vesicle-fusing ATPase OS=Mus musculus OX=10090 GN=Nsf PE=1 SV=2	X	X
P47857;P47857-2;P47857-3	ATP-dependent 6-phosphofructokinase_ muscle type OS=Mus musculus OX=10090 GN=Pfkm PE=1 SV=3	X	X
P48453;P48453-2	Serine/threonine-protein phosphatase 2B catalytic subunit beta isoform OS=Mus musculus OX=10090 GN=Ppp3cb PE=1 SV=2	X	X
P48722;P48722-2	Heat shock 70 kDa protein 4L OS=Mus musculus OX=10090 GN=Hspa4l PE=1 SV=2	X	X
P48758	Carbonyl reductase [NADPH] 1 OS=Mus musculus OX=10090 GN=Cbr1 PE=1 SV=3	X	X
P48774	Glutathione S-transferase Mu 5 OS=Mus musculus OX=10090 GN=Gstm5 PE=1 SV=1	X	X
P50396	Rab GDP dissociation inhibitor alpha OS=Mus musculus OX=10090 GN=Gdi1 PE=1 SV=3	X	X
P50516;P50516-2	V-type proton ATPase catalytic subunit A OS=Mus musculus OX=10090 GN=Atp6v1a PE=1 SV=2	X	X
P50518	V-type proton ATPase subunit E 1 OS=Mus musculus OX=10090 GN=Atp6v1e1 PE=1 SV=2	X	X
P50544	Very long-chain specific acyl-CoA dehydrogenase_ mitochondrial OS=Mus musculus OX=10090 GN=Acadvl PE=1 SV=3	X	X
P52480	Pyruvate kinase PKM OS=Mus musculus OX=10090 GN=Pkm PE=1 SV=4	X	X
P52480-2	Isoform M1 of Pyruvate kinase PKM OS=Mus musculus OX=10090 GN=Pkm	X	X
P53657	Pyruvate kinase PKLR OS=Mus musculus OX=10090 GN=Pklr PE=1 SV=1	X	X
P55258	Ras-related protein Rab-8A OS=Mus musculus OX=10090 GN=Rab8a PE=1 SV=2	X	X
P56371	Ras-related protein Rab-4A OS=Mus musculus OX=10090 GN=Rab4a PE=1 SV=2	X	X
P56399	Ubiquitin carboxyl-terminal hydrolase 5 OS=Mus musculus OX=10090 GN=Usp5 PE=1 SV=1	X	X
P56480	ATP synthase subunit beta_ mitochondrial OS=Mus musculus OX=10090 GN=Atp5f1b PE=1 SV=2	X	X
P57780	Alpha-actinin-4 OS=Mus musculus OX=10090 GN=Actn4 PE=1 SV=1	X	X
P58252	Elongation factor 2 OS=Mus musculus OX=10090 GN=Eef2 PE=1 SV=2	X	X
P59999	Actin-related protein 2/3 complex subunit 4 OS=Mus musculus OX=10090 GN=Arpc4 PE=1 SV=3	X	X
P60469-2;P60469	Isoform 2 of Liprin-alpha-3 OS=Mus musculus OX=10090 GN=Ppfia3	X	X
P60487	Chronophin OS=Mus musculus OX=10090 GN=Pdxp PE=1 SV=1	X	X
P61027	Ras-related protein Rab-10 OS=Mus musculus OX=10090 GN=Rab10 PE=1 SV=1	X	X
P61089	Ubiquitin-conjugating enzyme E2 N OS=Mus musculus OX=10090 GN=Ube2n PE=1 SV=1	X	X
P61164	Alpha-centractin OS=Mus musculus OX=10090 GN=Actr1a PE=1 SV=1	X	X
P61205	ADP-ribosylation factor 3 OS=Mus musculus OX=10090 GN=Arf3 PE=2 SV=2	X	X
P61264	Syntaxin-1B OS=Mus musculus OX=10090 GN=Stx1b PE=1 SV=1	X	X
P61750	ADP-ribosylation factor 4 OS=Mus musculus OX=10090 GN=Arf4 PE=1 SV=2	X	X
P61922;P61922-2	4-aminobutyrate aminotransferase_ mitochondrial OS=Mus musculus OX=10090 GN=Abat PE=1 SV=1	X	X
P61979;P61979-2;P61979-3	Heterogeneous nuclear ribonucleoprotein K OS=Mus musculus OX=10090 GN=Hnrnpk PE=1 SV=1	X	X
P61982	14-3-3 protein gamma OS=Mus musculus OX=10090 GN=Ywhag PE=1 SV=2	X	X
P62137	Serine/threonine-protein phosphatase PP1-alpha catalytic subunit OS=Mus musculus OX=10090 GN=Ppp1ca PE=1 SV=1	X	X
P62141	Serine/threonine-protein phosphatase PP1-beta catalytic subunit OS=Mus musculus OX=10090 GN=Ppp1cb PE=1 SV=3	X	X
P62259	14-3-3 protein epsilon OS=Mus musculus OX=10090 GN=Ywhae PE=1 SV=1	X	X
P62631	Elongation factor 1-alpha 2 OS=Mus musculus OX=10090 GN=Eef1a2 PE=1 SV=1	X	X
P62715;P63330	Serine/threonine-protein phosphatase 2A catalytic subunit beta isoform OS=Mus musculus OX=10090 GN=Ppp2cb PE=1 SV=1	X	X
P62761	Visinin-like protein 1 OS=Mus musculus OX=10090 GN=Vsnl1 PE=1 SV=2	X	X
P62774	Myotrophin OS=Mus musculus OX=10090 GN=Mtpn PE=1 SV=2	X	X
P62814	V-type proton ATPase subunit B_ brain isoform OS=Mus musculus OX=10090 GN=Atp6v1b2 PE=1 SV=1	X	X
P62821	Ras-related protein Rab-1A OS=Mus musculus OX=10090 GN=Rab1A PE=1 SV=3	X	X
P62823	Ras-related protein Rab-3C OS=Mus musculus OX=10090 GN=Rab3c PE=1 SV=1	X	X
P62827;Q61820	GTP-binding nuclear protein Ran OS=Mus musculus OX=10090 GN=Ran PE=1 SV=3	X	X
P62874;P29387	Guanine nucleotide-binding protein G(I)/G(S)/G(T) subunit beta-1 OS=Mus musculus OX=10090 GN=Gnb1 PE=1 SV=3	X	X
P62880	Guanine nucleotide-binding protein G(I)/G(S)/G(T) subunit beta-2 OS=Mus musculus OX=10090 GN=Gnb2 PE=1 SV=3	X	X
P62897	Cytochrome c_ somatic OS=Mus musculus OX=10090 GN=Cycs PE=1 SV=2	X	X
P62962	Profilin-1 OS=Mus musculus OX=10090 GN=Pfn1 PE=1 SV=2	X	X
P62984;P0CG49;P0CG50;P62983	Ubiquitin-60S ribosomal protein L40 OS=Mus musculus OX=10090 GN=Uba52 PE=1 SV=2	X	X
P63011;P35283	Ras-related protein Rab-3A OS=Mus musculus OX=10090 GN=Rab3a PE=1 SV=1	X	X
P63017	Heat shock cognate 71 kDa protein OS=Mus musculus OX=10090 GN=Hspa8 PE=1 SV=1	X	X
P63038;P63038-2	60 kDa heat shock protein_ mitochondrial OS=Mus musculus OX=10090 GN=Hspd1 PE=1 SV=1	X	X
P63085	Mitogen-activated protein kinase 1 OS=Mus musculus OX=10090 GN=Mapk1 PE=1 SV=3	X	X
P63087;P63087-2	Serine/threonine-protein phosphatase PP1-gamma catalytic subunit OS=Mus musculus OX=10090 GN=Ppp1cc PE=1 SV=1	X	X
P63101	14-3-3 protein zeta/delta OS=Mus musculus OX=10090 GN=Ywhaz PE=1 SV=1	X	X
P63260;P60710	Actin_ cytoplasmic 2 OS=Mus musculus OX=10090 GN=Actg1 PE=1 SV=1	X	X
P63328;P63328-2;P48455	Serine/threonine-protein phosphatase 2B catalytic subunit alpha isoform OS=Mus musculus OX=10090 GN=Ppp3ca PE=1 SV=1	X	X
P68037	Ubiquitin-conjugating enzyme E2 L3 OS=Mus musculus OX=10090 GN=Ube2l3 PE=1 SV=1	X	X
P68134	Actin_ alpha skeletal muscle OS=Mus musculus OX=10090 GN=Acta1 PE=1 SV=1	X	X
P68254;P68254-2	14-3-3 protein theta OS=Mus musculus OX=10090 GN=Ywhaq PE=1 SV=1	X	X
P68368	Tubulin alpha-4A chain OS=Mus musculus OX=10090 GN=Tuba4a PE=1 SV=1	X	X
P68373	Tubulin alpha-1C chain OS=Mus musculus OX=10090 GN=Tuba1c PE=1 SV=1	X	X
P68510	14-3-3 protein eta OS=Mus musculus OX=10090 GN=Ywhah PE=1 SV=2	X	X
P70296;Q8VIN1;Q8VIN1-2	Phosphatidylethanolamine-binding protein 1 OS=Mus musculus OX=10090 GN=Pebp1 PE=1 SV=3	X	X
P70349	Adenosine 5'-monophosphoramidase HINT1 OS=Mus musculus OX=10090 GN=Hint1 PE=1 SV=3	X	X
P70404	Isocitrate dehydrogenase [NAD] subunit gamma 1_ mitochondrial OS=Mus musculus OX=10090 GN=Idh3g PE=1 SV=1	X	X
P84078	ADP-ribosylation factor 1 OS=Mus musculus OX=10090 GN=Arf1 PE=1 SV=2	X	X
P84084	ADP-ribosylation factor 5 OS=Mus musculus OX=10090 GN=Arf5 PE=1 SV=2	X	X
P84228	Histone H3.2 OS=Mus musculus OX=10090 GN=H3c2 PE=1 SV=2	X	X
P97427	Dihydropyrimidinase-related protein 1 OS=Mus musculus OX=10090 GN=Crmp1 PE=1 SV=1	X	X
P97807;P97807-2	Fumarate hydratase_ mitochondrial OS=Mus musculus OX=10090 GN=Fh PE=1 SV=3	X	X
P97868;P97868-2	E3 ubiquitin-protein ligase RBBP6 OS=Mus musculus OX=10090 GN=Rbbp6 PE=1 SV=5	X	X
P97953;P97953-2;P97953-3;P97953-4	Vascular endothelial growth factor C OS=Mus musculus OX=10090 GN=Vegfc PE=1 SV=1	X	X
P99024	Tubulin beta-5 chain OS=Mus musculus OX=10090 GN=Tubb5 PE=1 SV=1	X	X
P99029;P99029-2	Peroxiredoxin-5_ mitochondrial OS=Mus musculus OX=10090 GN=Prdx5 PE=1 SV=2	X	X
Q2PFD7;Q2PFD7-2;Q2PFD7-4	PH and SEC7 domain-containing protein 3 OS=Mus musculus OX=10090 GN=Psd3 PE=1 SV=2	X	X
Q3KNY0;Q3KNY0-2	Immunoglobulin-like and fibronectin type III domain-containing protein 1 OS=Mus musculus OX=10090 GN=Igfn1 PE=1 SV=3	X	X
Q3UHL1	CaM kinase-like vesicle-associated protein OS=Mus musculus OX=10090 GN=Camkv PE=1 SV=2	X	X
Q3ULJ0;Q3ULJ0-2	Glycerol-3-phosphate dehydrogenase 1-like protein OS=Mus musculus OX=10090 GN=Gpd1l PE=1 SV=2	X	X
Q3UM45	Protein phosphatase 1 regulatory subunit 7 OS=Mus musculus OX=10090 GN=Ppp1r7 PE=1 SV=2	X	X
Q3UP38;Q3UP38-1	EF-hand calcium-binding domain-containing protein 4B OS=Mus musculus OX=10090 GN=Cracr2a PE=2 SV=2	0	X
Q3URD3;Q3URD3-2	Sarcolemmal membrane-associated protein OS=Mus musculus OX=10090 GN=Slmap PE=1 SV=2	X	X
Q3UX10	Tubulin alpha chain-like 3 OS=Mus musculus OX=10090 GN=Tubal3 PE=2 SV=2	X	X
Q3V3I2	Guanine nucleotide-binding protein G(t) subunit alpha-3 OS=Mus musculus OX=10090 GN=Gnat3 PE=1 SV=2	X	X
Q5M8N0	CB1 cannabinoid receptor-interacting protein 1 OS=Mus musculus OX=10090 GN=Cnrip1 PE=1 SV=1	X	X
Q6A065;Q6A065-2	Centrosomal protein of 170 kDa OS=Mus musculus OX=10090 GN=Cep170 PE=1 SV=2	X	X
Q6GQW0;Q6GQW0-2;Q6GQW0-3	Ankyrin repeat and BTB/POZ domain-containing protein BTBD11 OS=Mus musculus OX=10090 GN=Btbd11 PE=2 SV=2	X	X
Q6P1F6	Serine/threonine-protein phosphatase 2A 55 kDa regulatory subunit B alpha isoform OS=Mus musculus OX=10090 GN=Ppp2r2a PE=1 SV=1	X	X
Q6P8J7	Creatine kinase S-type_ mitochondrial OS=Mus musculus OX=10090 GN=Ckmt2 PE=1 SV=1	X	X
Q6PHZ2;Q6PHZ2-2;Q6PHZ2-4;Q6PHZ2-5	Calcium/calmodulin-dependent protein kinase type II subunit delta OS=Mus musculus OX=10090 GN=Camk2d PE=1 SV=1	X	X
Q6PIC6;Q64436	Sodium/potassium-transporting ATPase subunit alpha-3 OS=Mus musculus OX=10090 GN=Atp1a3 PE=1 SV=1	X	X
Q6PIE5	Sodium/potassium-transporting ATPase subunit alpha-2 OS=Mus musculus OX=10090 GN=Atp1a2 PE=1 SV=1	X	X
Q6R0H7;Q6R0H7-4;P63094;P63094-2	Guanine nucleotide-binding protein G(s) subunit alpha isoforms XLas OS=Mus musculus OX=10090 GN=Gnas PE=1 SV=1	X	X
Q6ZQ38	Cullin-associated NEDD8-dissociated protein 1 OS=Mus musculus OX=10090 GN=Cand1 PE=1 SV=2	X	X
Q7M6Y3;Q7M6Y3-2;Q7M6Y3-3;Q7M6Y3-4;Q7M6Y3-5;Q7M6Y3-6	Phosphatidylinositol-binding clathrin assembly protein OS=Mus musculus OX=10090 GN=Picalm PE=1 SV=1	X	X
Q7TMM9	Tubulin beta-2A chain OS=Mus musculus OX=10090 GN=Tubb2a PE=1 SV=1	X	X
Q7TPM6	Fibronectin type III and SPRY domain-containing protein 1 OS=Mus musculus OX=10090 GN=Fsd1 PE=1 SV=1	X	X
Q7TPR4	Alpha-actinin-1 OS=Mus musculus OX=10090 GN=Actn1 PE=1 SV=1	X	X
Q7TQD2	Tubulin polymerization-promoting protein OS=Mus musculus OX=10090 GN=Tppp PE=1 SV=1	X	X
Q7TQF7	Amphiphysin OS=Mus musculus OX=10090 GN=Amph PE=1 SV=1	X	X
Q7TQI3	Ubiquitin thioesterase OTUB1 OS=Mus musculus OX=10090 GN=Otub1 PE=1 SV=2	X	X
Q7TSJ2;Q7TSJ2-2;Q7TSJ2-3	Microtubule-associated protein 6 OS=Mus musculus OX=10090 GN=Map6 PE=1 SV=2	X	X
Q8BFZ3	Beta-actin-like protein 2 OS=Mus musculus OX=10090 GN=Actbl2 PE=1 SV=1	X	X
Q8BG05;Q8BG05-2	Heterogeneous nuclear ribonucleoprotein A3 OS=Mus musculus OX=10090 GN=Hnrnpa3 PE=1 SV=1	X	X
Q8BGZ1	Hippocalcin-like protein 4 OS=Mus musculus OX=10090 GN=Hpcal4 PE=1 SV=3	X	X
Q8BHC1	Ras-related protein Rab-39B OS=Mus musculus OX=10090 GN=Rab39b PE=1 SV=1	X	X
Q8BHD0	Ras-related protein Rab-39A OS=Mus musculus OX=10090 GN=Rab39a PE=1 SV=1	X	X
Q8BVE3	V-type proton ATPase subunit H OS=Mus musculus OX=10090 GN=Atp6v1h PE=1 SV=1	X	X
Q8BYI9	Tenascin-R OS=Mus musculus OX=10090 GN=Tnr PE=1 SV=2	X	X
Q8BZ98;Q8BZ98-2	Dynamin-3 OS=Mus musculus OX=10090 GN=Dnm3 PE=1 SV=1	X	X
Q8C650;Q8C650-2	Septin-10 OS=Mus musculus OX=10090 GN=Septin10 PE=1 SV=1	X	X
Q8C790;Q8C790-2	Protein FAM221A OS=Mus musculus OX=10090 GN=Fam221a PE=1 SV=1	X	X
Q8CG50	Ras-related protein Rab-43 OS=Mus musculus OX=10090 GN=Rab43 PE=1 SV=1	X	X
Q8CGK7	Guanine nucleotide-binding protein G(olf) subunit alpha OS=Mus musculus OX=10090 GN=Gnal PE=1 SV=1	X	X
Q8CHH9;Q8CHH9-2	Septin-8 OS=Mus musculus OX=10090 GN=Septin8 PE=1 SV=4	X	X
Q8CI94	Glycogen phosphorylase_ brain form OS=Mus musculus OX=10090 GN=Pygb PE=1 SV=3	X	X
Q8K0U4	Heat shock 70 kDa protein 12A OS=Mus musculus OX=10090 GN=Hspa12a PE=1 SV=1	X	X
Q8K1M6;Q8K1M6-2;Q8K1M6-3;Q8K1M6-4;Q8K1M6-5	Dynamin-1-like protein OS=Mus musculus OX=10090 GN=Dnm1l PE=1 SV=2	X	X
Q8K2B3	Succinate dehydrogenase [ubiquinone] flavoprotein subunit_ mitochondrial OS=Mus musculus OX=10090 GN=Sdha PE=1 SV=1	X	X
Q8K183	Pyridoxal kinase OS=Mus musculus OX=10090 GN=Pdxk PE=1 SV=1	X	X
Q8K386	Ras-related protein Rab-15 OS=Mus musculus OX=10090 GN=Rab15 PE=1 SV=1	X	X
Q8QZT1	Acetyl-CoA acetyltransferase_ mitochondrial OS=Mus musculus OX=10090 GN=Acat1 PE=1 SV=1	X	X
Q8R0A5	Transcription elongation factor A protein-like 3 OS=Mus musculus OX=10090 GN=Tceal3 PE=1 SV=2	X	X
Q8R5C5	Beta-centractin OS=Mus musculus OX=10090 GN=Actr1b PE=1 SV=1	X	X
Q8R5I6	Glutathione S-transferase Mu 4 OS=Mus musculus OX=10090 GN=Gstm4 PE=1 SV=1	X	X
Q8R081	Heterogeneous nuclear ribonucleoprotein L OS=Mus musculus OX=10090 GN=Hnrnpl PE=1 SV=2	X	X
Q8VBW5;Q8VBW5-3;Q8VBW5-4	HMG box transcription factor BBX OS=Mus musculus OX=10090 GN=Bbx PE=1 SV=2	X	X
Q8VDN2	Sodium/potassium-transporting ATPase subunit alpha-1 OS=Mus musculus OX=10090 GN=Atp1a1 PE=1 SV=1	X	X
Q9CPU0	Lactoylglutathione lyase OS=Mus musculus OX=10090 GN=Glo1 PE=1 SV=3	X	X
Q9CQ60	6-phosphogluconolactonase OS=Mus musculus OX=10090 GN=Pgls PE=1 SV=1	X	X
Q9CQI6	Coactosin-like protein OS=Mus musculus OX=10090 GN=Cotl1 PE=1 SV=3	X	X
Q9CQN1	Heat shock protein 75 kDa_ mitochondrial OS=Mus musculus OX=10090 GN=Trap1 PE=1 SV=1	X	X
Q9CQV8;Q9CQV8-2	14-3-3 protein beta/alpha OS=Mus musculus OX=10090 GN=Ywhab PE=1 SV=3	X	X
Q9CRD0	OCIA domain-containing protein 1 OS=Mus musculus OX=10090 GN=Ociad1 PE=1 SV=1	X	X
Q9CVB6	Actin-related protein 2/3 complex subunit 2 OS=Mus musculus OX=10090 GN=Arpc2 PE=1 SV=3	X	X
Q9CWF2	Tubulin beta-2B chain OS=Mus musculus OX=10090 GN=Tubb2b PE=1 SV=1	X	X
Q9CZT8	Ras-related protein Rab-3B OS=Mus musculus OX=10090 GN=Rab3b PE=1 SV=1	X	X
Q9CZU6	Citrate synthase_ mitochondrial OS=Mus musculus OX=10090 GN=Cs PE=1 SV=1	X	X
Q9D0F9	Phosphoglucomutase-1 OS=Mus musculus OX=10090 GN=Pgm1 PE=1 SV=4	X	X
Q9D0K2	Succinyl-CoA:3-ketoacid coenzyme A transferase 1_ mitochondrial OS=Mus musculus OX=10090 GN=Oxct1 PE=1 SV=1	X	X
Q9D1G1	Ras-related protein Rab-1B OS=Mus musculus OX=10090 GN=Rab1b PE=1 SV=1	X	X
Q9D6F9	Tubulin beta-4A chain OS=Mus musculus OX=10090 GN=Tubb4a PE=1 SV=3	X	X
Q9D6R2;Q9D6R2-2	Isocitrate dehydrogenase [NAD] subunit alpha_ mitochondrial OS=Mus musculus OX=10090 GN=Idh3a PE=1 SV=1	X	X
Q9D051	Pyruvate dehydrogenase E1 component subunit beta_ mitochondrial OS=Mus musculus OX=10090 GN=Pdhb PE=1 SV=1	X	X
Q9DAF3	Protein DDI1 homolog 1 OS=Mus musculus OX=10090 GN=Ddi1 PE=1 SV=1	X	X
Q9DBG3;Q9DBG3-2	AP-2 complex subunit beta OS=Mus musculus OX=10090 GN=Ap2b1 PE=1 SV=1	X	X
Q9DBJ1	Phosphoglycerate mutase 1 OS=Mus musculus OX=10090 GN=Pgam1 PE=1 SV=3	X	X
Q9DCR2	AP-3 complex subunit sigma-1 OS=Mus musculus OX=10090 GN=Ap3s1 PE=1 SV=2	X	X
Q9EQF6	Dihydropyrimidinase-related protein 5 OS=Mus musculus OX=10090 GN=Dpysl5 PE=1 SV=1	X	X
Q9ERD7	Tubulin beta-3 chain OS=Mus musculus OX=10090 GN=Tubb3 PE=1 SV=1	X	X
Q9ES52-2;Q9ES52-4	Isoform 2 of Phosphatidylinositol 3_4_5-trisphosphate 5-phosphatase 1 OS=Mus musculus OX=10090 GN=Inpp5d	X	X
Q9ES97;Q9ES97-2;Q9ES97-5;Q9ES97-3;Q9ES97-4	Reticulon-3 OS=Mus musculus OX=10090 GN=Rtn3 PE=1 SV=2	X	X
Q9JJZ2	Tubulin alpha-8 chain OS=Mus musculus OX=10090 GN=Tuba8 PE=1 SV=1	X	X
Q9JKK7;Q9JKK7-2	Tropomodulin-2 OS=Mus musculus OX=10090 GN=Tmod2 PE=1 SV=2	X	X
Q9JKM7	Ras-related protein Rab-37 OS=Mus musculus OX=10090 GN=Rab37 PE=1 SV=2	X	X
Q9JLN9;Q9JLN9-2	Serine/threonine-protein kinase mTOR OS=Mus musculus OX=10090 GN=Mtor PE=1 SV=2	X	X
Q9JM99;Q9JM99-2;Q9JM99-3;Q9JM99-4	Proteoglycan 4 OS=Mus musculus OX=10090 GN=Prg4 PE=1 SV=2	X	X
Q9QXS6;Q9QXS6-2;Q9QXS6-3	Drebrin OS=Mus musculus OX=10090 GN=Dbn1 PE=1 SV=4	X	X
Q9QYC0;Q9QYC0-2	Alpha-adducin OS=Mus musculus OX=10090 GN=Add1 PE=1 SV=2	X	X
Q9QYG0;Q9QYG0-2	Protein NDRG2 OS=Mus musculus OX=10090 GN=Ndrg2 PE=1 SV=1	X	X
Q9R0P5	Destrin OS=Mus musculus OX=10090 GN=Dstn PE=1 SV=3	X	X
Q9R0P9	Ubiquitin carboxyl-terminal hydrolase isozyme L1 OS=Mus musculus OX=10090 GN=Uchl1 PE=1 SV=1	X	X
Q9R0Q7	Prostaglandin E synthase 3 OS=Mus musculus OX=10090 GN=Ptges3 PE=1 SV=1	X	X
Q9R0Y5;Q9R0Y5-2	Adenylate kinase isoenzyme 1 OS=Mus musculus OX=10090 GN=Ak1 PE=1 SV=1	X	X
Q9R1Q8	Transgelin-3 OS=Mus musculus OX=10090 GN=Tagln3 PE=1 SV=1	X	X
Q9R111	Guanine deaminase OS=Mus musculus OX=10090 GN=Gda PE=1 SV=1	X	X
Q9WTS4	Teneurin-1 OS=Mus musculus OX=10090 GN=Tenm1 PE=1 SV=1	X	X
Q9WUA3;Q9WUA3-2	ATP-dependent 6-phosphofructokinase_ platelet type OS=Mus musculus OX=10090 GN=Pfkp PE=1 SV=1	X	X
Q9WV34;Q9WV34-2	MAGUK p55 subfamily member 2 OS=Mus musculus OX=10090 GN=Mpp2 PE=1 SV=1	X	X
Q9Z0E0;Q9Z0E0-2	Neurochondrin OS=Mus musculus OX=10090 GN=Ncdn PE=1 SV=1	X	X
Q9Z0P4;Q9Z0P4-2	Paralemmin-1 OS=Mus musculus OX=10090 GN=Palm PE=1 SV=1	X	X
Q9Z2Q6;P28661;P28661-2;P28661-3;P28661-4;P28661-5	Septin-5 OS=Mus musculus OX=10090 GN=Septin5 PE=1 SV=2	X	X
Q68FD5	Clathrin heavy chain 1 OS=Mus musculus OX=10090 GN=Cltc PE=1 SV=3	X	X
Q76MZ3	Serine/threonine-protein phosphatase 2A 65 kDa regulatory subunit A alpha isoform OS=Mus musculus OX=10090 GN=Ppp2r1a PE=1 SV=3	X	X
Q80TL4;Q80TL4-2	PHD finger protein 24 OS=Mus musculus OX=10090 GN=Phf24 PE=1 SV=2	X	X
Q80W21	Glutathione S-transferase Mu 7 OS=Mus musculus OX=10090 GN=Gstm7 PE=1 SV=1	X	X
Q80XI4;O70172	Phosphatidylinositol 5-phosphate 4-kinase type-2 beta OS=Mus musculus OX=10090 GN=Pip4k2b PE=1 SV=1	X	X
Q91V12;Q91V12-2;Q91V12-4;Q91V12-3	Cytosolic acyl coenzyme A thioester hydrolase OS=Mus musculus OX=10090 GN=Acot7 PE=1 SV=2	X	X
Q91V41	Ras-related protein Rab-14 OS=Mus musculus OX=10090 GN=Rab14 PE=1 SV=3	X	X
Q91X97	Neurocalcin-delta OS=Mus musculus OX=10090 GN=Ncald PE=1 SV=4	X	X
Q91XV3	Brain acid soluble protein 1 OS=Mus musculus OX=10090 GN=Basp1 PE=1 SV=3	X	X
Q91YH6	V-type proton ATPase subunit B_ kidney isoform OS=Mus musculus OX=10090 GN=Atp6v1b1 PE=1 SV=1	X	X
Q91ZR1	Ras-related protein Rab-4B OS=Mus musculus OX=10090 GN=Rab4b PE=1 SV=2	X	X
Q91ZZ3	Beta-synuclein OS=Mus musculus OX=10090 GN=Sncb PE=1 SV=1	X	X
Q99JY9	Actin-related protein 3 OS=Mus musculus OX=10090 GN=Actr3 PE=1 SV=3	X	X
Q99KI0	Aconitate hydratase_ mitochondrial OS=Mus musculus OX=10090 GN=Aco2 PE=1 SV=1	X	X
Q99LX0	Parkinson disease protein 7 homolog OS=Mus musculus OX=10090 GN=Park7 PE=1 SV=1	X	X
Q99MP8;Q99MP8-2;Q99MP8-3	BRCA1-associated protein OS=Mus musculus OX=10090 GN=Brap PE=1 SV=1	X	X
Q99P72;Q99P72-3	Reticulon-4 OS=Mus musculus OX=10090 GN=Rtn4 PE=1 SV=2	X	X
Q99PF4;Q99PF4-2;Q99PF4-4;Q99PF4-5;Q99PF4-6	Cadherin-23 OS=Mus musculus OX=10090 GN=Cdh23 PE=1 SV=2	X	X
Q99PT1	Rho GDP-dissociation inhibitor 1 OS=Mus musculus OX=10090 GN=Arhgdia PE=1 SV=3	X	X
Q571H0;Q571H0-2	Nucleolar pre-ribosomal-associated protein 1 OS=Mus musculus OX=10090 GN=Urb1 PE=1 SV=2	X	X
Q641P0;Q641P0-2	Actin-related protein 3B OS=Mus musculus OX=10090 GN=Actr3b PE=1 SV=1	X	X
Q811M1	Rho GTPase-activating protein 15 OS=Mus musculus OX=10090 GN=Arhgap15 PE=1 SV=1	X	X
Q921I1	Serotransferrin OS=Mus musculus OX=10090 GN=Tf PE=1 SV=1	X	X
Q921M7	CYFIP-related Rac1 interactor B OS=Mus musculus OX=10090 GN=Cyrib PE=1 SV=1	X	X
Q922F4	Tubulin beta-6 chain OS=Mus musculus OX=10090 GN=Tubb6 PE=1 SV=1	X	X
Q923L3;Q923L3-2	CUB and sushi domain-containing protein 1 OS=Mus musculus OX=10090 GN=Csmd1 PE=1 SV=2	X	X
Q923S9	Ras-related protein Rab-30 OS=Mus musculus OX=10090 GN=Rab30 PE=1 SV=1	X	X
Q01768	Nucleoside diphosphate kinase B OS=Mus musculus OX=10090 GN=Nme2 PE=1 SV=1	X	X
Q01853	Transitional endoplasmic reticulum ATPase OS=Mus musculus OX=10090 GN=Vcp PE=1 SV=4	X	X
Q02053;P31254	Ubiquitin-like modifier-activating enzyme 1 OS=Mus musculus OX=10090 GN=Uba1 PE=1 SV=1	X	X
Q03265	ATP synthase subunit alpha_ mitochondrial OS=Mus musculus OX=10090 GN=Atp5f1a PE=1 SV=1	X	X
Q04447	Creatine kinase B-type OS=Mus musculus OX=10090 GN=Ckb PE=1 SV=1	X	X
Q08331	Calretinin OS=Mus musculus OX=10090 GN=Calb2 PE=1 SV=3	X	X
Q60668;Q60668-2;Q60668-3;Q60668-4	Heterogeneous nuclear ribonucleoprotein D0 OS=Mus musculus OX=10090 GN=Hnrnpd PE=1 SV=2	X	X
Q61171	Peroxiredoxin-2 OS=Mus musculus OX=10090 GN=Prdx2 PE=1 SV=3	X	X
Q61206	Platelet-activating factor acetylhydrolase IB subunit alpha2 OS=Mus musculus OX=10090 GN=Pafah1b2 PE=1 SV=2	X	X
Q61207	Prosaposin OS=Mus musculus OX=10090 GN=Psap PE=1 SV=2	X	X
Q61316	Heat shock 70 kDa protein 4 OS=Mus musculus OX=10090 GN=Hspa4 PE=1 SV=1	X	X
Q61548;Q61548-2;Q61548-3	Clathrin coat assembly protein AP180 OS=Mus musculus OX=10090 GN=Snap91 PE=1 SV=1	X	X
Q61553	Fascin OS=Mus musculus OX=10090 GN=Fscn1 PE=1 SV=4	X	X
Q61598;Q61598-2	Rab GDP dissociation inhibitor beta OS=Mus musculus OX=10090 GN=Gdi2 PE=1 SV=1	X	X
Q61644	Protein kinase C and casein kinase substrate in neurons protein 1 OS=Mus musculus OX=10090 GN=Pacsin1 PE=1 SV=1	X	X
Q62048;Q62048-2	Astrocytic phosphoprotein PEA-15 OS=Mus musculus OX=10090 GN=Pea15 PE=1 SV=1	X	X
Q62188	Dihydropyrimidinase-related protein 3 OS=Mus musculus OX=10090 GN=Dpysl3 PE=1 SV=1	X	X
Q62261;Q62261-2	Spectrin beta chain_ non-erythrocytic 1 OS=Mus musculus OX=10090 GN=Sptbn1 PE=1 SV=2	X	X
Q62277	Synaptophysin OS=Mus musculus OX=10090 GN=Syp PE=1 SV=2	X	X
Q62420	Endophilin-A1 OS=Mus musculus OX=10090 GN=Sh3gl2 PE=1 SV=2	X	X
Q63810;Q63810-2	Calcineurin subunit B type 1 OS=Mus musculus OX=10090 GN=Ppp3r1 PE=1 SV=3	X	X
Q63844	Mitogen-activated protein kinase 3 OS=Mus musculus OX=10090 GN=Mapk3 PE=1 SV=5	X	X
Q64332;Q64332-2	Synapsin-2 OS=Mus musculus OX=10090 GN=Syn2 PE=1 SV=2	X	X
Q64433	10 kDa heat shock protein_ mitochondrial OS=Mus musculus OX=10090 GN=Hspe1 PE=1 SV=2	X	X
Q64467	Glyceraldehyde-3-phosphate dehydrogenase_ testis-specific OS=Mus musculus OX=10090 GN=Gapdhs PE=1 SV=1	X	X
P25318;P25318-2	Collagen alpha-2(VIII) chain OS=Mus musculus OX=10090 GN=Col8a2 PE=2 SV=2	X	X
Q7TNP2	Serine/threonine-protein phosphatase 2A 65 kDa regulatory subunit A beta isoform OS=Mus musculus OX=10090 GN=Ppp2r1b PE=1 SV=2	X	0

## Sheet: Sheet_3_CT_Vs_NIC_Female
Sheet S3. Complete list of deregulated proteins in NIC females when compared to CT
				CT- / +NIC
Accession	Peptide count	Unique peptides	Anova (p)	Fold change	Mass	Description
P84228	2	1	0.00360877	6.03815	15445.1	Histone H3.2 OS=Mus musculus OX=10090 GN=H3c2 PE=1 SV=2
P70349	2	1	0.00480033	-1.64546	13891	Adenosine 5'-monophosphoramidase HINT1 OS=Mus musculus OX=10090 GN=Hint1 PE=1 SV=3
P48758	2	1	0.000104425	5.38408	30926.4	Carbonyl reductase [NADPH] 1 OS=Mus musculus OX=10090 GN=Cbr1 PE=1 SV=3
Q8R081	2	1	0.0144661	-2.48686	64591.1	Heterogeneous nuclear ribonucleoprotein L OS=Mus musculus OX=10090 GN=Hnrnpl PE=1 SV=2
Q9JM99;Q9JM99-2;Q9JM99-3;Q9JM99-4	2	2	0.000439092	-2.35541	117251	Proteoglycan 4 OS=Mus musculus OX=10090 GN=Prg4 PE=1 SV=2
Q921I1	2	1	6.43885e-06	2.57894	78890.9	Serotransferrin OS=Mus musculus OX=10090 GN=Tf PE=1 SV=1
Q9ES52-2;Q9ES52-4	2	1	0.0232372	-1.74204	134299	Isoform 2 of Phosphatidylinositol 3_4_5-trisphosphate 5-phosphatase 1 OS=Mus musculus OX=10090 GN=Inpp5d
Q8R5C5	2	1	1.20213e-05	2.89244	42395.5	Beta-centractin OS=Mus musculus OX=10090 GN=Actr1b PE=1 SV=1
Q9D0F9	2	1	0.000129842	3.97144	61703.4	Phosphoglucomutase-1 OS=Mus musculus OX=10090 GN=Pgm1 PE=1 SV=4
Q80TL4;Q80TL4-2	2	2	0.000274362	-1.85273	45964.3	PHD finger protein 24 OS=Mus musculus OX=10090 GN=Phf24 PE=1 SV=2
Q6GQW0;Q6GQW0-2;Q6GQW0-3	2	1	0.0218327	-2.66782	123272	Ankyrin repeat and BTB/POZ domain-containing protein BTBD11 OS=Mus musculus OX=10090 GN=Btbd11 PE=2 SV=2
Q9WV34;Q9WV34-2	2	1	0.0199268	2.54548	61840.3	MAGUK p55 subfamily member 2 OS=Mus musculus OX=10090 GN=Mpp2 PE=1 SV=1
P02301;P84244	2	1	1.43846e-05	4.62574	15372	Histone H3.3C OS=Mus musculus OX=10090 GN=H3-5 PE=3 SV=3
Q9CVB6	2	2	0.000177418	1.94627	34471.2	Actin-related protein 2/3 complex subunit 2 OS=Mus musculus OX=10090 GN=Arpc2 PE=1 SV=3
Q6P1F6	2	2	7.68464e-07	2.5213	52205.4	Serine/threonine-protein phosphatase 2A 55 kDa regulatory subunit B alpha isoform OS=Mus musculus OX=10090 GN=Ppp2r2a PE=1 SV=1
P43006;P43006-2;P43006-3	2	1	3.56975e-07	2.12198	62543.6	Excitatory amino acid transporter 2 OS=Mus musculus OX=10090 GN=Slc1a2 PE=1 SV=1
Q9CQ60	2	2	3.3437e-06	2.56184	27482.6	6-phosphogluconolactonase OS=Mus musculus OX=10090 GN=Pgls PE=1 SV=1
Q923S9	3	1	0.0422562	1.86882	23400.4	Ras-related protein Rab-30 OS=Mus musculus OX=10090 GN=Rab30 PE=1 SV=1
P97868;P97868-2	3	1	0.0426172	2.50335	200614	E3 ubiquitin-protein ligase RBBP6 OS=Mus musculus OX=10090 GN=Rbbp6 PE=1 SV=5
Q3URD3;Q3URD3-2	3	1	8.31157e-05	3.75283	97789	Sarcolemmal membrane-associated protein OS=Mus musculus OX=10090 GN=Slmap PE=1 SV=2
Q61206	3	3	8.51349e-06	1.84617	25752.5	Platelet-activating factor acetylhydrolase IB subunit alpha2 OS=Mus musculus OX=10090 GN=Pafah1b2 PE=1 SV=2
Q63810;Q63810-2	3	1	0.00410657	-1.60605	19414	Calcineurin subunit B type 1 OS=Mus musculus OX=10090 GN=Ppp3r1 PE=1 SV=3
P31938	3	2	0.0105541	2.10722	43816.3	Dual specificity mitogen-activated protein kinase kinase 1 OS=Mus musculus OX=10090 GN=Map2k1 PE=1 SV=2
Q9JKK7;Q9JKK7-2	3	2	0.0276676	1.75643	39510.9	Tropomodulin-2 OS=Mus musculus OX=10090 GN=Tmod2 PE=1 SV=2
P61164	3	1	0.000708321	-1.85638	42727.9	Alpha-centractin OS=Mus musculus OX=10090 GN=Actr1a PE=1 SV=1
P14211	3	2	0.0246879	-1.60801	48165.7	Calreticulin OS=Mus musculus OX=10090 GN=Calr PE=1 SV=1
O08585	3	1	0.0429964	-3.39694	25661.1	Clathrin light chain A OS=Mus musculus OX=10090 GN=Clta PE=1 SV=2
P61089	4	1	0.00625495	-2.17685	17194.9	Ubiquitin-conjugating enzyme E2 N OS=Mus musculus OX=10090 GN=Ube2n PE=1 SV=1
P00920	4	2	0.0320155	1.60692	29146.6	Carbonic anhydrase 2 OS=Mus musculus OX=10090 GN=Ca2 PE=1 SV=4
B2RSH2	4	1	4.25199e-06	3.30969	40931.4	Guanine nucleotide-binding protein G(i) subunit alpha-1 OS=Mus musculus OX=10090 GN=Gnai1 PE=1 SV=1
Q571H0;Q571H0-2	4	2	5.38567e-05	1.64547	256724	Nucleolar pre-ribosomal-associated protein 1 OS=Mus musculus OX=10090 GN=Urb1 PE=1 SV=2
Q6PHZ2;Q6PHZ2-2;Q6PHZ2-4;Q6PHZ2-5	4	1	0.028933	-1.5139	56996.8	Calcium/calmodulin-dependent protein kinase type II subunit delta OS=Mus musculus OX=10090 GN=Camk2d PE=1 SV=1
P35917	4	2	0.000866856	1.66284	155127	Vascular endothelial growth factor receptor 3 OS=Mus musculus OX=10090 GN=Flt4 PE=1 SV=1
Q9QYC0;Q9QYC0-2	4	1	0.000149168	1.85668	81045.8	Alpha-adducin OS=Mus musculus OX=10090 GN=Add1 PE=1 SV=2
Q8K386	4	1	0.0233847	-1.96175	24603.6	Ras-related protein Rab-15 OS=Mus musculus OX=10090 GN=Rab15 PE=1 SV=1
D3Z7P3;D3Z7P3-2	4	3	0.00023537	1.79842	74819.3	Glutaminase kidney isoform_ mitochondrial OS=Mus musculus OX=10090 GN=Gls PE=1 SV=1
P02104	4	2	0.000103044	2.30596	16193.7	Hemoglobin subunit epsilon-Y2 OS=Mus musculus OX=10090 GN=Hbb-y PE=1 SV=2
Q91ZR1	4	1	4.19582e-05	4.51559	23914	Ras-related protein Rab-4B OS=Mus musculus OX=10090 GN=Rab4b PE=1 SV=2
Q9QYG0;Q9QYG0-2	5	3	0.00800737	1.57324	41131.5	Protein NDRG2 OS=Mus musculus OX=10090 GN=Ndrg2 PE=1 SV=1
Q8BZ98;Q8BZ98-2	5	1	0.0159377	-1.71594	97589.8	Dynamin-3 OS=Mus musculus OX=10090 GN=Dnm3 PE=1 SV=1
Q6ZQ38	5	2	3.29791e-07	2.40929	138043	Cullin-associated NEDD8-dissociated protein 1 OS=Mus musculus OX=10090 GN=Cand1 PE=1 SV=2
Q8K0U4	5	2	5.88826e-07	1.79538	75213.7	Heat shock 70 kDa protein 12A OS=Mus musculus OX=10090 GN=Hspa12a PE=1 SV=1
Q921M7	5	3	0.000362739	-1.65346	37061.2	CYFIP-related Rac1 interactor B OS=Mus musculus OX=10090 GN=Cyrib PE=1 SV=1
O55042;O55042-2	6	2	0.045389	-1.6747	14485.3	Alpha-synuclein OS=Mus musculus OX=10090 GN=Snca PE=1 SV=2
Q5M8N0	6	2	0.000427125	1.5591	18726.4	CB1 cannabinoid receptor-interacting protein 1 OS=Mus musculus OX=10090 GN=Cnrip1 PE=1 SV=1
Q7TQD2	6	3	9.09823e-05	1.70802	23745.7	Tubulin polymerization-promoting protein OS=Mus musculus OX=10090 GN=Tppp PE=1 SV=1
Q99PT1	7	4	0.00411637	-1.52272	23464.5	Rho GDP-dissociation inhibitor 1 OS=Mus musculus OX=10090 GN=Arhgdia PE=1 SV=3
Q8BVE3	7	2	3.40253e-05	2.09405	56311.3	V-type proton ATPase subunit H OS=Mus musculus OX=10090 GN=Atp6v1h PE=1 SV=1
P61750	7	1	1.3878e-06	3.10714	20510.7	ADP-ribosylation factor 4 OS=Mus musculus OX=10090 GN=Arf4 PE=1 SV=2
Q91V12;Q91V12-2;Q91V12-4;Q91V12-3	7	3	5.38386e-06	1.86628	42993.2	Cytosolic acyl coenzyme A thioester hydrolase OS=Mus musculus OX=10090 GN=Acot7 PE=1 SV=2
P08113	7	3	0.00100961	-1.68831	92761.1	Endoplasmin OS=Mus musculus OX=10090 GN=Hsp90b1 PE=1 SV=2
P84084	8	2	1.13602e-07	3.01542	20643.8	ADP-ribosylation factor 5 OS=Mus musculus OX=10090 GN=Arf5 PE=1 SV=2
P61027	8	7	0.00187816	-1.50755	22769.1	Ras-related protein Rab-10 OS=Mus musculus OX=10090 GN=Rab10 PE=1 SV=1
Q99P72;Q99P72-3	8	5	0.00721224	1.50597	127127	Reticulon-4 OS=Mus musculus OX=10090 GN=Rtn4 PE=1 SV=2
Q7M6Y3;Q7M6Y3-2;Q7M6Y3-3;Q7M6Y3-4;Q7M6Y3-5;Q7M6Y3-6	8	4	3.5268e-06	2.66051	71714.6	Phosphatidylinositol-binding clathrin assembly protein OS=Mus musculus OX=10090 GN=Picalm PE=1 SV=1
Q9D0K2	10	5	2.58776e-05	1.60071	56387.9	Succinyl-CoA:3-ketoacid coenzyme A transferase 1_ mitochondrial OS=Mus musculus OX=10090 GN=Oxct1 PE=1 SV=1
Q6PIE5	10	2	0.0205804	-1.7405	113529	Sodium/potassium-transporting ATPase subunit alpha-2 OS=Mus musculus OX=10090 GN=Atp1a2 PE=1 SV=1
P58252	10	5	0.000800319	1.54628	96283.7	Elongation factor 2 OS=Mus musculus OX=10090 GN=Eef2 PE=1 SV=2
P62823	11	3	0.000714536	2.98442	26100.3	Ras-related protein Rab-3C OS=Mus musculus OX=10090 GN=Rab3c PE=1 SV=1
P61264	12	6	0.00247527	1.51693	33472.9	Syntaxin-1B OS=Mus musculus OX=10090 GN=Stx1b PE=1 SV=1
Q3ULJ0;Q3ULJ0-2	13	1	0.0307016	2.53372	38852.9	Glycerol-3-phosphate dehydrogenase 1-like protein OS=Mus musculus OX=10090 GN=Gpd1l PE=1 SV=2
Q61316	14	3	0.000351563	-1.75143	94931.2	Heat shock 70 kDa protein 4 OS=Mus musculus OX=10090 GN=Hspa4 PE=1 SV=1
P62814	15	6	0.0343396	1.54628	56893.1	V-type proton ATPase subunit B_ brain isoform OS=Mus musculus OX=10090 GN=Atp6v1b2 PE=1 SV=1
P17426;P17426-2	16	7	0.00887939	1.53576	108748	AP-2 complex subunit alpha-1 OS=Mus musculus OX=10090 GN=Ap2a1 PE=1 SV=1
P61982	20	11	2.41011e-05	1.68724	28473.7	14-3-3 protein gamma OS=Mus musculus OX=10090 GN=Ywhag PE=1 SV=2
Q922F4	23	3	0.00104458	-1.50799	50546.7	Tubulin beta-6 chain OS=Mus musculus OX=10090 GN=Tubb6 PE=1 SV=1
P68368	24	6	1.82169e-05	1.55886	50665.8	Tubulin alpha-4A chain OS=Mus musculus OX=10090 GN=Tuba4a PE=1 SV=1
Q9DBG3;Q9DBG3-2	35	13	0.000434484	1.52649	105495	AP-2 complex subunit beta OS=Mus musculus OX=10090 GN=Ap2b1 PE=1 SV=1

## Sheet: Sheet_4_CT_Vs_NIC_Male
Sheet S4. Complete list of deregulated proteins in NIC males when compared to CT
				CT- / +NIC
Accession	Peptide count	Unique peptides	Anova (p)	Fold Change	Mass	Description
Q8K2B3	2	1	6.93925e-06	-7.31911	73669	Succinate dehydrogenase [ubiquinone] flavoprotein subunit_ mitochondrial OS=Mus musculus OX=10090 GN=Sdha PE=1 SV=1
Q8BHD0	2	1	0.000245696	-2.54147	25376.8	Ras-related protein Rab-39A OS=Mus musculus OX=10090 GN=Rab39a PE=1 SV=1
P48758	2	1	7.65646e-05	19.526	30926.4	Carbonyl reductase [NADPH] 1 OS=Mus musculus OX=10090 GN=Cbr1 PE=1 SV=3
Q9JM99;Q9JM99-2;Q9JM99-3;Q9JM99-4	2	2	2.76978e-06	-2.05656	117251	Proteoglycan 4 OS=Mus musculus OX=10090 GN=Prg4 PE=1 SV=2
P01831	2	1	0.0184289	-1.87855	18308.1	Thy-1 membrane glycoprotein OS=Mus musculus OX=10090 GN=Thy1 PE=1 SV=1
Q8C790;Q8C790-2	2	1	0.000379051	-2.07637	34144.4	Protein FAM221A OS=Mus musculus OX=10090 GN=Fam221a PE=1 SV=1
P19157;P46425	2	2	0.0001356	3.58134	23780.3	Glutathione S-transferase P 1 OS=Mus musculus OX=10090 GN=Gstp1 PE=1 SV=2
Q91X97	2	1	0.0209377	-2.00509	22359.4	Neurocalcin-delta OS=Mus musculus OX=10090 GN=Ncald PE=1 SV=4
Q8BG05;Q8BG05-2	2	1	0.000793662	-4.60586	39880.2	Heterogeneous nuclear ribonucleoprotein A3 OS=Mus musculus OX=10090 GN=Hnrnpa3 PE=1 SV=1
O70250	2	1	6.29522e-05	-8.45445	28998.2	Phosphoglycerate mutase 2 OS=Mus musculus OX=10090 GN=Pgam2 PE=1 SV=3
Q9WV34;Q9WV34-2	2	1	0.0130304	20.494	61840.3	MAGUK p55 subfamily member 2 OS=Mus musculus OX=10090 GN=Mpp2 PE=1 SV=1
Q9CVB6	2	2	0.0423835	2.25098	34471.2	Actin-related protein 2/3 complex subunit 2 OS=Mus musculus OX=10090 GN=Arpc2 PE=1 SV=3
Q8C650;Q8C650-2	2	1	0.0170564	-1.92331	53220.6	Septin-10 OS=Mus musculus OX=10090 GN=Septin10 PE=1 SV=1
P97953;P97953-2;P97953-3;P97953-4	2	1	0.00195432	3.89764	48695.2	Vascular endothelial growth factor C OS=Mus musculus OX=10090 GN=Vegfc PE=1 SV=1
P43006;P43006-2;P43006-3	2	1	0.00229227	3.69381	62543.6	Excitatory amino acid transporter 2 OS=Mus musculus OX=10090 GN=Slc1a2 PE=1 SV=1
Q923L3;Q923L3-2	2	1	0.0142154	-1.91809	396017	CUB and sushi domain-containing protein 1 OS=Mus musculus OX=10090 GN=Csmd1 PE=1 SV=2
Q9WTS4	2	1	0.0471359	-2.09636	310643	Teneurin-1 OS=Mus musculus OX=10090 GN=Tenm1 PE=1 SV=1
Q9CPU0	2	2	1.52757e-06	5.04691	20980.7	Lactoylglutathione lyase OS=Mus musculus OX=10090 GN=Glo1 PE=1 SV=3
Q63810;Q63810-2	3	1	0.00269194	-1.51642	19414	Calcineurin subunit B type 1 OS=Mus musculus OX=10090 GN=Ppp3r1 PE=1 SV=3
Q3UM45	3	3	0.000256285	-1.6777	41406.1	Protein phosphatase 1 regulatory subunit 7 OS=Mus musculus OX=10090 GN=Ppp1r7 PE=1 SV=2
Q3URD3;Q3URD3-2	3	1	0.00306613	-5.12998	97789	Sarcolemmal membrane-associated protein OS=Mus musculus OX=10090 GN=Slmap PE=1 SV=2
Q7TPM6	3	1	0.0495073	12.5133	55981.4	Fibronectin type III and SPRY domain-containing protein 1 OS=Mus musculus OX=10090 GN=Fsd1 PE=1 SV=1
P10630;P10630-2	3	1	5.51179e-06	5.3586	46630.5	Eukaryotic initiation factor 4A-II OS=Mus musculus OX=10090 GN=Eif4a2 PE=1 SV=2
Q99PF4;Q99PF4-2;Q99PF4-4;Q99PF4-5;Q99PF4-6	3	2	0.0111593	3.73733	370307	Cadherin-23 OS=Mus musculus OX=10090 GN=Cdh23 PE=1 SV=2
Q8CGK7	3	1	1.50533e-05	2.68938	44821.8	Guanine nucleotide-binding protein G(olf) subunit alpha OS=Mus musculus OX=10090 GN=Gnal PE=1 SV=1
Q61206	3	3	0.0239687	1.76657	25752.5	Platelet-activating factor acetylhydrolase IB subunit alpha2 OS=Mus musculus OX=10090 GN=Pafah1b2 PE=1 SV=2
Q08331	3	2	0.00168595	-1.6449	31486.8	Calretinin OS=Mus musculus OX=10090 GN=Calb2 PE=1 SV=3
P59999	3	2	0.0263449	1.53496	19781.1	Actin-related protein 2/3 complex subunit 4 OS=Mus musculus OX=10090 GN=Arpc4 PE=1 SV=3
Q9ES97;Q9ES97-2;Q9ES97-5;Q9ES97-3;Q9ES97-4	3	2	0.00718146	-1.73593	104506	Reticulon-3 OS=Mus musculus OX=10090 GN=Rtn3 PE=1 SV=2
Q7TQI3	3	2	2.67695e-07	2.60003	31498.2	Ubiquitin thioesterase OTUB1 OS=Mus musculus OX=10090 GN=Otub1 PE=1 SV=2
P14211	3	2	0.00148903	3.5462	48165.7	Calreticulin OS=Mus musculus OX=10090 GN=Calr PE=1 SV=1
P31938	3	2	4.58678e-05	8.65868	43816.3	Dual specificity mitogen-activated protein kinase kinase 1 OS=Mus musculus OX=10090 GN=Map2k1 PE=1 SV=2
P50544	3	3	0.0193224	1.6597	71274.8	Very long-chain specific acyl-CoA dehydrogenase_ mitochondrial OS=Mus musculus OX=10090 GN=Acadvl PE=1 SV=3
P23506;P23506-2	3	2	0.0375527	-2.06447	24691.5	Protein-L-isoaspartate(D-aspartate) O-methyltransferase OS=Mus musculus OX=10090 GN=Pcmt1 PE=1 SV=3
P02104	4	2	0.000201985	1.93061	16193.7	Hemoglobin subunit epsilon-Y2 OS=Mus musculus OX=10090 GN=Hbb-y PE=1 SV=2
D3Z7P3;D3Z7P3-2	4	3	3.01176e-06	3.41939	74819.3	Glutaminase kidney isoform_ mitochondrial OS=Mus musculus OX=10090 GN=Gls PE=1 SV=1
Q61207	4	2	4.2086e-05	5.40079	63304.1	Prosaposin OS=Mus musculus OX=10090 GN=Psap PE=1 SV=2
Q9QYC0;Q9QYC0-2	4	1	0.00237593	2.99435	81045.8	Alpha-adducin OS=Mus musculus OX=10090 GN=Add1 PE=1 SV=2
P48722;P48722-2	4	1	6.54127e-05	3.93661	95237.7	Heat shock 70 kDa protein 4L OS=Mus musculus OX=10090 GN=Hspa4l PE=1 SV=2
P62984;P0CG49;P0CG50;P62983	4	3	0.000156288	-1.65189	15013.5	Ubiquitin-60S ribosomal protein L40 OS=Mus musculus OX=10090 GN=Uba52 PE=1 SV=2
Q8CG50	4	2	0.000605264	2.03063	23491.4	Ras-related protein Rab-43 OS=Mus musculus OX=10090 GN=Rab43 PE=1 SV=1
P35917	4	2	0.00027878	2.03104	155127	Vascular endothelial growth factor receptor 3 OS=Mus musculus OX=10090 GN=Flt4 PE=1 SV=1
P61089	4	1	4.02184e-07	-12.7419	17194.9	Ubiquitin-conjugating enzyme E2 N OS=Mus musculus OX=10090 GN=Ube2n PE=1 SV=1
B2RSH2	4	1	0.00334513	3.65362	40931.4	Guanine nucleotide-binding protein G(i) subunit alpha-1 OS=Mus musculus OX=10090 GN=Gnai1 PE=1 SV=1
P00920	4	2	0.0272609	1.86239	29146.6	Carbonic anhydrase 2 OS=Mus musculus OX=10090 GN=Ca2 PE=1 SV=4
Q6PHZ2;Q6PHZ2-2;Q6PHZ2-4;Q6PHZ2-5	4	1	0.000107702	-3.29059	56996.8	Calcium/calmodulin-dependent protein kinase type II subunit delta OS=Mus musculus OX=10090 GN=Camk2d PE=1 SV=1
P26645	4	4	1.02558e-07	-8.00015	29718.4	Myristoylated alanine-rich C-kinase substrate OS=Mus musculus OX=10090 GN=Marcks PE=1 SV=2
Q6P8J7	5	2	2.05129e-08	-2.50351	47929.6	Creatine kinase S-type_ mitochondrial OS=Mus musculus OX=10090 GN=Ckmt2 PE=1 SV=1
Q8K0U4	5	2	2.43726e-05	2.1104	75213.7	Heat shock 70 kDa protein 12A OS=Mus musculus OX=10090 GN=Hspa12a PE=1 SV=1
Q6ZQ38	5	2	0.00110998	2.02425	138043	Cullin-associated NEDD8-dissociated protein 1 OS=Mus musculus OX=10090 GN=Cand1 PE=1 SV=2
P55258	5	1	0.00255722	2.34634	23839.3	Ras-related protein Rab-8A OS=Mus musculus OX=10090 GN=Rab8a PE=1 SV=2
Q9QYG0;Q9QYG0-2	5	3	0.000527312	1.91136	41131.5	Protein NDRG2 OS=Mus musculus OX=10090 GN=Ndrg2 PE=1 SV=1
O88569;O88569-2;O88569-3	5	2	0.000552425	2.75506	37459.8	Heterogeneous nuclear ribonucleoproteins A2/B1 OS=Mus musculus OX=10090 GN=Hnrnpa2b1 PE=1 SV=2
Q8BZ98;Q8BZ98-2	5	1	0.00488006	-1.83728	97589.8	Dynamin-3 OS=Mus musculus OX=10090 GN=Dnm3 PE=1 SV=1
P15532	6	4	0.00207294	1.78603	17321.9	Nucleoside diphosphate kinase A OS=Mus musculus OX=10090 GN=Nme1 PE=1 SV=1
Q7TQD2	6	3	0.00160651	2.03464	23745.7	Tubulin polymerization-promoting protein OS=Mus musculus OX=10090 GN=Tppp PE=1 SV=1
O55042;O55042-2	6	2	0.00102854	-1.98334	14485.3	Alpha-synuclein OS=Mus musculus OX=10090 GN=Snca PE=1 SV=2
P35486	6	2	0.00191211	3.42108	43916.1	Pyruvate dehydrogenase E1 component subunit alpha_ somatic form_ mitochondrial OS=Mus musculus OX=10090 GN=Pdha1 PE=1 SV=1
Q5M8N0	6	2	0.000123008	1.89673	18726.4	CB1 cannabinoid receptor-interacting protein 1 OS=Mus musculus OX=10090 GN=Cnrip1 PE=1 SV=1
Q61171	7	6	0.0198129	1.60394	21949.8	Peroxiredoxin-2 OS=Mus musculus OX=10090 GN=Prdx2 PE=1 SV=3
Q62048;Q62048-2	7	4	5.89391e-09	-8.14509	15111.2	Astrocytic phosphoprotein PEA-15 OS=Mus musculus OX=10090 GN=Pea15 PE=1 SV=1
P08113	7	3	0.00565351	-1.54242	92761.1	Endoplasmin OS=Mus musculus OX=10090 GN=Hsp90b1 PE=1 SV=2
Q03265	7	2	5.81951e-05	1.67652	59866.8	ATP synthase subunit alpha_ mitochondrial OS=Mus musculus OX=10090 GN=Atp5f1a PE=1 SV=1
P61027	8	7	0.000752496	-2.2643	22769.1	Ras-related protein Rab-10 OS=Mus musculus OX=10090 GN=Rab10 PE=1 SV=1
P48453;P48453-2	8	1	4.02256e-06	-1.54952	59857.9	Serine/threonine-protein phosphatase 2B catalytic subunit beta isoform OS=Mus musculus OX=10090 GN=Ppp3cb PE=1 SV=2
Q9D1G1	8	2	9.46413e-09	-1.95066	22358.3	Ras-related protein Rab-1B OS=Mus musculus OX=10090 GN=Rab1b PE=1 SV=1
Q9CZT8	8	3	0.0339876	1.5875	24985.1	Ras-related protein Rab-3B OS=Mus musculus OX=10090 GN=Rab3b PE=1 SV=1
Q9WUA3;Q9WUA3-2	8	3	0.000366733	-1.9857	86481.7	ATP-dependent 6-phosphofructokinase_ platelet type OS=Mus musculus OX=10090 GN=Pfkp PE=1 SV=1
Q8K183	9	5	5.90596e-05	2.8796	35300.4	Pyridoxal kinase OS=Mus musculus OX=10090 GN=Pdxk PE=1 SV=1
P12658	9	3	0.00290056	-1.70488	30222.2	Calbindin OS=Mus musculus OX=10090 GN=Calb1 PE=1 SV=2
O89053	9	8	4.16881e-06	-2.32356	51673.6	Coronin-1A OS=Mus musculus OX=10090 GN=Coro1a PE=1 SV=5
Q8QZT1	9	5	5.8987e-09	-2.19286	45158.4	Acetyl-CoA acetyltransferase_ mitochondrial OS=Mus musculus OX=10090 GN=Acat1 PE=1 SV=1
P99029;P99029-2	9	5	0.00370904	1.80627	22239.7	Peroxiredoxin-5_ mitochondrial OS=Mus musculus OX=10090 GN=Prdx5 PE=1 SV=2
P19639	9	1	1.31237e-06	1.91809	25929.8	Glutathione S-transferase Mu 3 OS=Mus musculus OX=10090 GN=Gstm3 PE=1 SV=2
Q91V41	9	2	0.0271563	1.65418	24125.1	Ras-related protein Rab-14 OS=Mus musculus OX=10090 GN=Rab14 PE=1 SV=3
P10637-5;P10637-3;P10637-4	9	1	2.79819e-06	-2.42295	39074.7	Isoform Tau-D of Microtubule-associated protein tau OS=Mus musculus OX=10090 GN=Mapt
P06837	9	6	0.00111705	-1.84054	23746.5	Neuromodulin OS=Mus musculus OX=10090 GN=Gap43 PE=1 SV=1
P58252	10	5	0.00426215	2.24418	96283.7	Elongation factor 2 OS=Mus musculus OX=10090 GN=Eef2 PE=1 SV=2
Q8VDN2	10	3	0.00010929	-1.5208	114294	Sodium/potassium-transporting ATPase subunit alpha-1 OS=Mus musculus OX=10090 GN=Atp1a1 PE=1 SV=1
P45591	10	5	2.41858e-05	-2.0918	18823.7	Cofilin-2 OS=Mus musculus OX=10090 GN=Cfl2 PE=1 SV=1
Q9D0K2	10	5	1.40903e-05	2.97752	56387.9	Succinyl-CoA:3-ketoacid coenzyme A transferase 1_ mitochondrial OS=Mus musculus OX=10090 GN=Oxct1 PE=1 SV=1
P62880	10	2	1.33188e-07	7.5612	38072.5	Guanine nucleotide-binding protein G(I)/G(S)/G(T) subunit beta-2 OS=Mus musculus OX=10090 GN=Gnb2 PE=1 SV=3
Q91XV3	10	5	4.86851e-10	-3.49402	22086.6	Brain acid soluble protein 1 OS=Mus musculus OX=10090 GN=Basp1 PE=1 SV=3
P50518	11	4	2.31605e-07	-2.25367	26214.5	V-type proton ATPase subunit E 1 OS=Mus musculus OX=10090 GN=Atp6v1e1 PE=1 SV=2
P10126	11	4	0.00142752	-1.58361	50456.1	Elongation factor 1-alpha 1 OS=Mus musculus OX=10090 GN=Eef1a1 PE=1 SV=3
Q6PIC6;Q64436	12	3	0.000418818	-2.01306	113117	Sodium/potassium-transporting ATPase subunit alpha-3 OS=Mus musculus OX=10090 GN=Atp1a3 PE=1 SV=1
P61264	12	6	9.4481e-05	2.31209	33472.9	Syntaxin-1B OS=Mus musculus OX=10090 GN=Stx1b PE=1 SV=1
Q3ULJ0;Q3ULJ0-2	13	1	0.029519	-1.90459	38852.9	Glycerol-3-phosphate dehydrogenase 1-like protein OS=Mus musculus OX=10090 GN=Gpd1l PE=1 SV=2
Q62420	13	6	5.53843e-06	1.73571	40126.5	Endophilin-A1 OS=Mus musculus OX=10090 GN=Sh3gl2 PE=1 SV=2
P16627	14	6	3.8639e-05	-1.71729	71036.6	Heat shock 70 kDa protein 1-like OS=Mus musculus OX=10090 GN=Hspa1l PE=1 SV=4
Q61316	14	3	0.000225443	-1.88383	94931.2	Heat shock 70 kDa protein 4 OS=Mus musculus OX=10090 GN=Hspa4 PE=1 SV=1
P20029	14	6	2.70253e-06	-2.39038	72536.2	Endoplasmic reticulum chaperone BiP OS=Mus musculus OX=10090 GN=Hspa5 PE=1 SV=3
P28652	14	2	0.00117873	-5.50108	61202.3	Calcium/calmodulin-dependent protein kinase type II subunit beta OS=Mus musculus OX=10090 GN=Camk2b PE=1 SV=2
P62814	15	6	0.0057298	2.45948	56893.1	V-type proton ATPase subunit B_ brain isoform OS=Mus musculus OX=10090 GN=Atp6v1b2 PE=1 SV=1
P17426;P17426-2	16	7	0.0017286	2.09599	108748	AP-2 complex subunit alpha-1 OS=Mus musculus OX=10090 GN=Ap2a1 PE=1 SV=1
P01942	16	8	0.00441173	1.67687	15142.2	Hemoglobin subunit alpha OS=Mus musculus OX=10090 GN=Hba PE=1 SV=2
Q61644	16	8	5.43224e-07	-2.56302	50917.5	Protein kinase C and casein kinase substrate in neurons protein 1 OS=Mus musculus OX=10090 GN=Pacsin1 PE=1 SV=1
P11798;P11798-2	18	5	0.0398512	2.07184	54685.1	Calcium/calmodulin-dependent protein kinase type II subunit alpha OS=Mus musculus OX=10090 GN=Camk2a PE=1 SV=2
P63085	18	8	3.65126e-05	-1.85714	41674.9	Mitogen-activated protein kinase 1 OS=Mus musculus OX=10090 GN=Mapk1 PE=1 SV=3
P06151	19	11	1.76746e-05	-1.95785	36840.8	L-lactate dehydrogenase A chain OS=Mus musculus OX=10090 GN=Ldha PE=1 SV=3
Q9R0P9	19	9	1.25718e-05	-2.03647	25180.5	Ubiquitin carboxyl-terminal hydrolase isozyme L1 OS=Mus musculus OX=10090 GN=Uchl1 PE=1 SV=1
P26443	20	12	0.000194778	-1.88822	61679.1	Glutamate dehydrogenase 1_ mitochondrial OS=Mus musculus OX=10090 GN=Glud1 PE=1 SV=1
P61982	20	11	5.52807e-07	2.66617	28473.7	14-3-3 protein gamma OS=Mus musculus OX=10090 GN=Ywhag PE=1 SV=2
Q9CZU6	20	14	0.00129506	-1.61768	52021.9	Citrate synthase_ mitochondrial OS=Mus musculus OX=10090 GN=Cs PE=1 SV=1
Q9Z0E0;Q9Z0E0-2	20	12	2.4435e-08	-2.50583	80321.1	Neurochondrin OS=Mus musculus OX=10090 GN=Ncdn PE=1 SV=1
P62259	21	9	0.000337114	-1.63108	29345	14-3-3 protein epsilon OS=Mus musculus OX=10090 GN=Ywhae PE=1 SV=1
P46096	22	7	2.48375e-08	-2.43343	47760.2	Synaptotagmin-1 OS=Mus musculus OX=10090 GN=Syt1 PE=1 SV=1
Q61548;Q61548-2;Q61548-3	22	13	0.00114261	1.85333	92136.7	Clathrin coat assembly protein AP180 OS=Mus musculus OX=10090 GN=Snap91 PE=1 SV=1
P05201	22	14	0.000122497	1.6497	46532.8	Aspartate aminotransferase_ cytoplasmic OS=Mus musculus OX=10090 GN=Got1 PE=1 SV=3
P17710;P17710-3;P17710-4;P17710-2	22	13	1.33058e-06	-1.58905	109615	Hexokinase-1 OS=Mus musculus OX=10090 GN=Hk1 PE=1 SV=3
Q922F4	23	3	3.23183e-05	-1.58139	50546.7	Tubulin beta-6 chain OS=Mus musculus OX=10090 GN=Tubb6 PE=1 SV=1
P16125	24	9	7.04912e-07	-4.62105	36857.5	L-lactate dehydrogenase B chain OS=Mus musculus OX=10090 GN=Ldhb PE=1 SV=2
Q9R111	24	15	4.62506e-05	-1.50574	51526.4	Guanine deaminase OS=Mus musculus OX=10090 GN=Gda PE=1 SV=1
O35643	24	6	2.185e-08	-2.28202	104790	AP-1 complex subunit beta-1 OS=Mus musculus OX=10090 GN=Ap1b1 PE=1 SV=2
Q8BFZ3	25	7	7.3433e-08	-1.98578	42346.5	Beta-actin-like protein 2 OS=Mus musculus OX=10090 GN=Actbl2 PE=1 SV=1
O88935;O88935-1;O88935-3	28	12	0.00144047	-1.54223	74268.5	Synapsin-1 OS=Mus musculus OX=10090 GN=Syn1 PE=1 SV=2
P56480	28	17	8.23551e-05	-1.63939	56300.6	ATP synthase subunit beta_ mitochondrial OS=Mus musculus OX=10090 GN=Atp5f1b PE=1 SV=2
P63038;P63038-2	29	13	0.000402024	-1.54084	61126.7	60 kDa heat shock protein_ mitochondrial OS=Mus musculus OX=10090 GN=Hspd1 PE=1 SV=1
Q02053;P31254	30	12	9.86877e-05	1.83485	119007	Ubiquitin-like modifier-activating enzyme 1 OS=Mus musculus OX=10090 GN=Uba1 PE=1 SV=1
Q62261;Q62261-2	30	16	0.033921	2.00111	275079	Spectrin beta chain_ non-erythrocytic 1 OS=Mus musculus OX=10090 GN=Sptbn1 PE=1 SV=2
P16858	31	15	0.000117584	-1.99379	36095.2	Glyceraldehyde-3-phosphate dehydrogenase OS=Mus musculus OX=10090 GN=Gapdh PE=1 SV=2
P52480-2	35	5	3.31416e-05	-1.62876	58498.5	Isoform M1 of Pyruvate kinase PKM OS=Mus musculus OX=10090 GN=Pkm
P17182	36	16	0.000866374	2.01444	47483.1	Alpha-enolase OS=Mus musculus OX=10090 GN=Eno1 PE=1 SV=3
Q7TMM9	37	2	0.000215493	2.60177	50306.3	Tubulin beta-2A chain OS=Mus musculus OX=10090 GN=Tubb2a PE=1 SV=1
P39053-3	37	1	9.01268e-12	-2.68191	96269.8	Isoform 3 of Dynamin-1 OS=Mus musculus OX=10090 GN=Dnm1
P39053-4	37	1	1.16095e-06	-2.72877	97823.7	Isoform 4 of Dynamin-1 OS=Mus musculus OX=10090 GN=Dnm1
P07901	38	13	1.74764e-07	-1.90758	85187.2	Heat shock protein HSP 90-alpha OS=Mus musculus OX=10090 GN=Hsp90aa1 PE=1 SV=4
P05064	39	20	0.00020641	-1.63682	39812.2	Fructose-bisphosphate aldolase A OS=Mus musculus OX=10090 GN=Aldoa PE=1 SV=2
P39053;P39053-5;P39053-6	41	3	7.52176e-13	-9.83324	98202.2	Dynamin-1 OS=Mus musculus OX=10090 GN=Dnm1 PE=1 SV=2
P52480	41	7	3.31416e-05	-1.62876	58415.3	Pyruvate kinase PKM OS=Mus musculus OX=10090 GN=Pkm PE=1 SV=4
P63260;P60710	43	11	1.2124e-05	-2.14888	42135.1	Actin_ cytoplasmic 2 OS=Mus musculus OX=10090 GN=Actg1 PE=1 SV=1
O08553	47	26	0.00228661	-1.7323	62676.9	Dihydropyrimidinase-related protein 2 OS=Mus musculus OX=10090 GN=Dpysl2 PE=1 SV=2
P11499	50	24	3.23408e-05	-1.9373	83623.5	Heat shock protein HSP 90-beta OS=Mus musculus OX=10090 GN=Hsp90ab1 PE=1 SV=3
P16546;P16546-2	127	68	9.32078e-07	-1.6699	285396	Spectrin alpha chain_ non-erythrocytic 1 OS=Mus musculus OX=10090 GN=Sptan1 PE=1 SV=4

## Sheet: Sheet_5_CT_Vs_PCP_Female
Sheet S5. Complete list of deregulated proteins in PCP females when compared to CT
				CT- / +PCP
Accession	Peptide count	Unique peptides	Anova (p)	Fold Change	Mass	Description
P43006;P43006-2;P43006-3	2	1	4.69646e-05	2.09495	62543.6	Excitatory amino acid transporter 2 OS=Mus musculus OX=10090 GN=Slc1a2 PE=1 SV=1
Q8R5C5	2	1	0.0125834	1.62793	42395.5	Beta-centractin OS=Mus musculus OX=10090 GN=Actr1b PE=1 SV=1
Q8R0A5	2	1	0.00738766	-3.53379	22525.6	Transcription elongation factor A protein-like 3 OS=Mus musculus OX=10090 GN=Tceal3 PE=1 SV=2
Q921I1	2	1	0.000148667	2.03784	78890.9	Serotransferrin OS=Mus musculus OX=10090 GN=Tf PE=1 SV=1
Q9JLN9;Q9JLN9-2	2	1	0.00224363	-3.0853	290843	Serine/threonine-protein kinase mTOR OS=Mus musculus OX=10090 GN=Mtor PE=1 SV=2
P48758	2	1	0.00908425	2.91562	30926.4	Carbonyl reductase [NADPH] 1 OS=Mus musculus OX=10090 GN=Cbr1 PE=1 SV=3
Q80TL4;Q80TL4-2	2	2	0.0198113	-1.56043	45964.3	PHD finger protein 24 OS=Mus musculus OX=10090 GN=Phf24 PE=1 SV=2
Q9R0Q7	2	1	0.00746036	1.55636	19006.6	Prostaglandin E synthase 3 OS=Mus musculus OX=10090 GN=Ptges3 PE=1 SV=1
P97953;P97953-2;P97953-3;P97953-4	2	1	0.000427564	1.602	48695.2	Vascular endothelial growth factor C OS=Mus musculus OX=10090 GN=Vegfc PE=1 SV=1
P35802	2	2	0.0105259	-2.268	31890.9	Neuronal membrane glycoprotein M6-a OS=Mus musculus OX=10090 GN=Gpm6a PE=1 SV=1
Q6P1F6	2	2	0.0024665	1.68319	52205.4	Serine/threonine-protein phosphatase 2A 55 kDa regulatory subunit B alpha isoform OS=Mus musculus OX=10090 GN=Ppp2r2a PE=1 SV=1
P61164	3	1	0.00881283	-1.72277	42727.9	Alpha-centractin OS=Mus musculus OX=10090 GN=Actr1a PE=1 SV=1
P31938	3	2	0.0469972	1.76232	43816.3	Dual specificity mitogen-activated protein kinase kinase 1 OS=Mus musculus OX=10090 GN=Map2k1 PE=1 SV=2
P14211	3	2	0.00344055	-1.52167	48165.7	Calreticulin OS=Mus musculus OX=10090 GN=Calr PE=1 SV=1
Q7TPM6	3	1	0.000237565	1.81402	55981.4	Fibronectin type III and SPRY domain-containing protein 1 OS=Mus musculus OX=10090 GN=Fsd1 PE=1 SV=1
B2RSH2	4	1	0.0101667	1.91621	40931.4	Guanine nucleotide-binding protein G(i) subunit alpha-1 OS=Mus musculus OX=10090 GN=Gnai1 PE=1 SV=1
Q9QYC0;Q9QYC0-2	4	1	0.000160374	1.51599	81045.8	Alpha-adducin OS=Mus musculus OX=10090 GN=Add1 PE=1 SV=2
Q91ZR1	4	1	0.00350449	1.78058	23914	Ras-related protein Rab-4B OS=Mus musculus OX=10090 GN=Rab4b PE=1 SV=2
Q8K386	4	1	0.0417821	-1.74656	24603.6	Ras-related protein Rab-15 OS=Mus musculus OX=10090 GN=Rab15 PE=1 SV=1
P02104	4	2	0.00185337	1.67677	16193.7	Hemoglobin subunit epsilon-Y2 OS=Mus musculus OX=10090 GN=Hbb-y PE=1 SV=2
Q61207	4	2	1.00155e-05	1.82621	63304.1	Prosaposin OS=Mus musculus OX=10090 GN=Psap PE=1 SV=2
Q6P8J7	5	2	0.00495788	-1.81764	47929.6	Creatine kinase S-type_ mitochondrial OS=Mus musculus OX=10090 GN=Ckmt2 PE=1 SV=1
Q9QYG0;Q9QYG0-2	5	3	3.22205e-05	1.57209	41131.5	Protein NDRG2 OS=Mus musculus OX=10090 GN=Ndrg2 PE=1 SV=1
Q6ZQ38	5	2	0.000445021	1.57942	138043	Cullin-associated NEDD8-dissociated protein 1 OS=Mus musculus OX=10090 GN=Cand1 PE=1 SV=2
P61750	7	1	1.41955e-05	2.42902	20510.7	ADP-ribosylation factor 4 OS=Mus musculus OX=10090 GN=Arf4 PE=1 SV=2
P84084	8	2	0.000627561	1.78509	20643.8	ADP-ribosylation factor 5 OS=Mus musculus OX=10090 GN=Arf5 PE=1 SV=2
Q6PIE5	10	2	0.00403789	-2.38265	113529	Sodium/potassium-transporting ATPase subunit alpha-2 OS=Mus musculus OX=10090 GN=Atp1a2 PE=1 SV=1
P61264	12	6	7.3874e-05	1.53287	33472.9	Syntaxin-1B OS=Mus musculus OX=10090 GN=Stx1b PE=1 SV=1
A2AQ07	12	1	0.00325392	-1.97857	51125.4	Tubulin beta-1 chain OS=Mus musculus OX=10090 GN=Tubb1 PE=1 SV=1
P40142	12	6	0.00126116	1.5552	68314.9	Transketolase OS=Mus musculus OX=10090 GN=Tkt PE=1 SV=1
P18872	14	2	0.00101319	1.55299	40654.9	Guanine nucleotide-binding protein G(o) subunit alpha OS=Mus musculus OX=10090 GN=Gnao1 PE=1 SV=3
P61982	20	11	1.17211e-05	1.51459	28473.7	14-3-3 protein gamma OS=Mus musculus OX=10090 GN=Ywhag PE=1 SV=2
Q9CQV8;Q9CQV8-2	21	9	0.00861706	-2.16024	28200.5	14-3-3 protein beta/alpha OS=Mus musculus OX=10090 GN=Ywhab PE=1 SV=3
P16125	24	9	0.0263831	-1.54307	36857.5	L-lactate dehydrogenase B chain OS=Mus musculus OX=10090 GN=Ldhb PE=1 SV=2
Q62261;Q62261-2	30	16	5.90299e-05	1.76936	275079	Spectrin beta chain_ non-erythrocytic 1 OS=Mus musculus OX=10090 GN=Sptbn1 PE=1 SV=2
P39053;P39053-5;P39053-6	41	3	0.039069	-1.54508	98202.2	Dynamin-1 OS=Mus musculus OX=10090 GN=Dnm1 PE=1 SV=2

## Sheet: Sheet_6_CT_Vs_PCP_Male
Sheet S6. Complete list of deregulated proteins in PCP males when compared to CT
				CT- / +PCP
Accession	Peptide count	Unique peptides	Anova (p)	Fold Change	Mass	Description
Q8R5C5	2	1	0.00572135	-2.14852	42395.5	Beta-centractin OS=Mus musculus OX=10090 GN=Actr1b PE=1 SV=1
Q8R0A5	2	1	0.000230364	3.66813	22525.6	Transcription elongation factor A protein-like 3 OS=Mus musculus OX=10090 GN=Tceal3 PE=1 SV=2
P12023;P12023-2;P12023-3	2	1	0.000565067	-2.08603	87748.7	Amyloid-beta precursor protein OS=Mus musculus OX=10090 GN=App PE=1 SV=3
Q9JLN9;Q9JLN9-2	2	1	0.000249781	2.99962	290843	Serine/threonine-protein kinase mTOR OS=Mus musculus OX=10090 GN=Mtor PE=1 SV=2
Q921I1	2	1	0.00017644	-1.72978	78890.9	Serotransferrin OS=Mus musculus OX=10090 GN=Tf PE=1 SV=1
Q9D0F9	2	1	0.00244057	-6.0461	61703.4	Phosphoglucomutase-1 OS=Mus musculus OX=10090 GN=Pgm1 PE=1 SV=4
Q9CQ60	2	2	0.0363349	-1.60258	27482.6	6-phosphogluconolactonase OS=Mus musculus OX=10090 GN=Pgls PE=1 SV=1
P43006;P43006-2;P43006-3	2	1	0.0277019	-2.22134	62543.6	Excitatory amino acid transporter 2 OS=Mus musculus OX=10090 GN=Slc1a2 PE=1 SV=1
Q9WV34;Q9WV34-2	2	1	0.00635432	-4.75029	61840.3	MAGUK p55 subfamily member 2 OS=Mus musculus OX=10090 GN=Mpp2 PE=1 SV=1
Q6GQW0;Q6GQW0-2;Q6GQW0-3	2	1	0.00999581	1.9811	123272	Ankyrin repeat and BTB/POZ domain-containing protein BTBD11 OS=Mus musculus OX=10090 GN=Btbd11 PE=2 SV=2
P02301;P84244	2	1	0.000863704	-9.43191	15372	Histone H3.3C OS=Mus musculus OX=10090 GN=H3-5 PE=3 SV=3
P10630;P10630-2	3	1	0.000541958	-2.50774	46630.5	Eukaryotic initiation factor 4A-II OS=Mus musculus OX=10090 GN=Eif4a2 PE=1 SV=2
Q9JKK7;Q9JKK7-2	3	2	0.0179352	-3.49573	39510.9	Tropomodulin-2 OS=Mus musculus OX=10090 GN=Tmod2 PE=1 SV=2
P31938	3	2	0.0316193	-1.94511	43816.3	Dual specificity mitogen-activated protein kinase kinase 1 OS=Mus musculus OX=10090 GN=Map2k1 PE=1 SV=2
P14211	3	2	0.0322505	-2.99453	48165.7	Calreticulin OS=Mus musculus OX=10090 GN=Calr PE=1 SV=1
O08585	3	1	0.0155067	-2.86833	25661.1	Clathrin light chain A OS=Mus musculus OX=10090 GN=Clta PE=1 SV=2
Q3V3I2	3	1	0.00204595	-8.56556	40829.3	Guanine nucleotide-binding protein G(t) subunit alpha-3 OS=Mus musculus OX=10090 GN=Gnat3 PE=1 SV=2
Q7TPM6	3	1	0.00944123	-3.09408	55981.4	Fibronectin type III and SPRY domain-containing protein 1 OS=Mus musculus OX=10090 GN=Fsd1 PE=1 SV=1
Q923S9	3	1	0.00658192	-3.91546	23400.4	Ras-related protein Rab-30 OS=Mus musculus OX=10090 GN=Rab30 PE=1 SV=1
Q571H0;Q571H0-2	4	2	0.00480371	-1.80773	256724	Nucleolar pre-ribosomal-associated protein 1 OS=Mus musculus OX=10090 GN=Urb1 PE=1 SV=2
P35917	4	2	0.000447711	-1.6409	155127	Vascular endothelial growth factor receptor 3 OS=Mus musculus OX=10090 GN=Flt4 PE=1 SV=1
P48722;P48722-2	4	1	0.00239741	-1.71932	95237.7	Heat shock 70 kDa protein 4L OS=Mus musculus OX=10090 GN=Hspa4l PE=1 SV=2
Q61207	4	2	1.12894e-08	-3.05717	63304.1	Prosaposin OS=Mus musculus OX=10090 GN=Psap PE=1 SV=2
Q91ZR1	4	1	0.0256584	-1.52473	23914	Ras-related protein Rab-4B OS=Mus musculus OX=10090 GN=Rab4b PE=1 SV=2
Q8K386	4	1	0.0435415	-2.19719	24603.6	Ras-related protein Rab-15 OS=Mus musculus OX=10090 GN=Rab15 PE=1 SV=1
D3Z7P3;D3Z7P3-2	4	3	0.000122276	-1.94439	74819.3	Glutaminase kidney isoform_ mitochondrial OS=Mus musculus OX=10090 GN=Gls PE=1 SV=1
P12960	5	2	0.00253947	-1.51636	114244	Contactin-1 OS=Mus musculus OX=10090 GN=Cntn1 PE=1 SV=1
Q64467	6	1	0.020806	-1.8331	48398.4	Glyceraldehyde-3-phosphate dehydrogenase_ testis-specific OS=Mus musculus OX=10090 GN=Gapdhs PE=1 SV=1
P35486	6	2	0.000970287	-2.63304	43916.1	Pyruvate dehydrogenase E1 component subunit alpha_ somatic form_ mitochondrial OS=Mus musculus OX=10090 GN=Pdha1 PE=1 SV=1
Q62048;Q62048-2	7	4	0.00456301	1.55416	15111.2	Astrocytic phosphoprotein PEA-15 OS=Mus musculus OX=10090 GN=Pea15 PE=1 SV=1
P61750	7	1	0.000956089	1.95492	20510.7	ADP-ribosylation factor 4 OS=Mus musculus OX=10090 GN=Arf4 PE=1 SV=2
P62880	10	2	2.19429e-05	-1.95791	38072.5	Guanine nucleotide-binding protein G(I)/G(S)/G(T) subunit beta-2 OS=Mus musculus OX=10090 GN=Gnb2 PE=1 SV=3
Q6PIE5	10	2	0.00102851	2.09349	113529	Sodium/potassium-transporting ATPase subunit alpha-2 OS=Mus musculus OX=10090 GN=Atp1a2 PE=1 SV=1
Q3ULJ0;Q3ULJ0-2	13	1	0.0424853	-1.55781	38852.9	Glycerol-3-phosphate dehydrogenase 1-like protein OS=Mus musculus OX=10090 GN=Gpd1l PE=1 SV=2
Q9CQV8;Q9CQV8-2	21	9	0.00213308	2.26745	28200.5	14-3-3 protein beta/alpha OS=Mus musculus OX=10090 GN=Ywhab PE=1 SV=3
P39053-4	37	1	0.000185449	1.71446	97823.7	Isoform 4 of Dynamin-1 OS=Mus musculus OX=10090 GN=Dnm1
P39053-3	37	1	8.83965e-05	1.64403	96269.8	Isoform 3 of Dynamin-1 OS=Mus musculus OX=10090 GN=Dnm1
P39053;P39053-5;P39053-6	41	3	0.00020343	2.37429	98202.2	Dynamin-1 OS=Mus musculus OX=10090 GN=Dnm1 PE=1 SV=2

## Sheet: Sheet_7_CT_Vs_PCPNIC_Female
Sheet S7. Complete list of deregulated proteins in PCPNIC females when compared to CT
				CT- / +PCPNIC
Accession	Peptide count	Unique peptides	Anova (p)	Fold Change	Mass	Description
P02301;P84244	2	1	0.00705685	2.04584	15372	Histone H3.3C OS=Mus musculus OX=10090 GN=H3-5 PE=3 SV=3
Q8VBW5;Q8VBW5-3;Q8VBW5-4	2	2	6.35e-06	2.01509	101809	HMG box transcription factor BBX OS=Mus musculus OX=10090 GN=Bbx PE=1 SV=2
Q8BG05;Q8BG05-2	2	1	0.0219866	-2.25507	39880.2	Heterogeneous nuclear ribonucleoprotein A3 OS=Mus musculus OX=10090 GN=Hnrnpa3 PE=1 SV=1
Q91X97	2	1	0.00577741	-3.22987	22359.4	Neurocalcin-delta OS=Mus musculus OX=10090 GN=Ncald PE=1 SV=4
P19157;P46425	2	2	5.43592e-09	2.45801	23780.3	Glutathione S-transferase P 1 OS=Mus musculus OX=10090 GN=Gstp1 PE=1 SV=2
P62827;Q61820	2	2	5.46015e-05	1.62096	24594.2	GTP-binding nuclear protein Ran OS=Mus musculus OX=10090 GN=Ran PE=1 SV=3
Q8C790;Q8C790-2	2	1	2.95759e-05	-3.64531	34144.4	Protein FAM221A OS=Mus musculus OX=10090 GN=Fam221a PE=1 SV=1
P01831	2	1	0.0014304	-1.9451	18308.1	Thy-1 membrane glycoprotein OS=Mus musculus OX=10090 GN=Thy1 PE=1 SV=1
Q9JM99;Q9JM99-2;Q9JM99-3;Q9JM99-4	2	2	3.09191e-06	-3.03811	117251	Proteoglycan 4 OS=Mus musculus OX=10090 GN=Prg4 PE=1 SV=2
Q8R081	2	1	0.000139968	-6.04705	64591.1	Heterogeneous nuclear ribonucleoprotein L OS=Mus musculus OX=10090 GN=Hnrnpl PE=1 SV=2
P48758	2	1	0.0428377	1.94761	30926.4	Carbonyl reductase [NADPH] 1 OS=Mus musculus OX=10090 GN=Cbr1 PE=1 SV=3
Q8BHD0	2	1	0.00137708	-2.10758	25376.8	Ras-related protein Rab-39A OS=Mus musculus OX=10090 GN=Rab39a PE=1 SV=1
P70349	2	1	0.00911243	-1.55513	13891	Adenosine 5'-monophosphoramidase HINT1 OS=Mus musculus OX=10090 GN=Hint1 PE=1 SV=3
Q8R5C5	2	1	0.00182767	1.74704	42395.5	Beta-centractin OS=Mus musculus OX=10090 GN=Actr1b PE=1 SV=1
Q921I1	2	1	2.01129e-05	1.81905	78890.9	Serotransferrin OS=Mus musculus OX=10090 GN=Tf PE=1 SV=1
Q9ES52-2;Q9ES52-4	2	1	0.00289073	-1.53357	134299	Isoform 2 of Phosphatidylinositol 3_4_5-trisphosphate 5-phosphatase 1 OS=Mus musculus OX=10090 GN=Inpp5d
Q8K2B3	2	1	0.00296681	-5.1331	73669	Succinate dehydrogenase [ubiquinone] flavoprotein subunit_ mitochondrial OS=Mus musculus OX=10090 GN=Sdha PE=1 SV=1
O70250	2	1	0.0107886	-2.26887	28998.2	Phosphoglycerate mutase 2 OS=Mus musculus OX=10090 GN=Pgam2 PE=1 SV=3
Q3UP38;Q3UP38-1	2	1	0.049883	-2.52751	83351.7	EF-hand calcium-binding domain-containing protein 4B OS=Mus musculus OX=10090 GN=Cracr2a PE=2 SV=2
P43006;P43006-2;P43006-3	2	1	1.53099e-10	3.25602	62543.6	Excitatory amino acid transporter 2 OS=Mus musculus OX=10090 GN=Slc1a2 PE=1 SV=1
Q6P1F6	2	2	7.33362e-06	2.05233	52205.4	Serine/threonine-protein phosphatase 2A 55 kDa regulatory subunit B alpha isoform OS=Mus musculus OX=10090 GN=Ppp2r2a PE=1 SV=1
Q9CQ60	2	2	0.00767987	1.52248	27482.6	6-phosphogluconolactonase OS=Mus musculus OX=10090 GN=Pgls PE=1 SV=1
Q8C650;Q8C650-2	2	1	0.0143497	-1.89212	53220.6	Septin-10 OS=Mus musculus OX=10090 GN=Septin10 PE=1 SV=1
Q811M1	2	1	0.0335341	-1.95274	55738.5	Rho GTPase-activating protein 15 OS=Mus musculus OX=10090 GN=Arhgap15 PE=1 SV=1
Q9CPU0	2	2	9.84129e-06	1.51157	20980.7	Lactoylglutathione lyase OS=Mus musculus OX=10090 GN=Glo1 PE=1 SV=3
P68037	2	1	0.00224651	-6.68189	18032.7	Ubiquitin-conjugating enzyme E2 L3 OS=Mus musculus OX=10090 GN=Ube2l3 PE=1 SV=1
Q99LX0	2	2	3.19127e-05	1.85483	20249.5	Parkinson disease protein 7 homolog OS=Mus musculus OX=10090 GN=Park7 PE=1 SV=1
Q9R0Q7	2	1	3.92507e-07	2.31126	19006.6	Prostaglandin E synthase 3 OS=Mus musculus OX=10090 GN=Ptges3 PE=1 SV=1
Q80TL4;Q80TL4-2	2	2	0.000225371	-1.90858	45964.3	PHD finger protein 24 OS=Mus musculus OX=10090 GN=Phf24 PE=1 SV=2
P70404	2	2	6.51196e-06	1.82694	43184.7	Isocitrate dehydrogenase [NAD] subunit gamma 1_ mitochondrial OS=Mus musculus OX=10090 GN=Idh3g PE=1 SV=1
Q9D0F9	2	1	0.00440355	3.83448	61703.4	Phosphoglucomutase-1 OS=Mus musculus OX=10090 GN=Pgm1 PE=1 SV=4
Q8CGK7	3	1	8.92236e-07	2.5606	44821.8	Guanine nucleotide-binding protein G(olf) subunit alpha OS=Mus musculus OX=10090 GN=Gnal PE=1 SV=1
Q3UM45	3	3	8.67378e-05	1.69787	41406.1	Protein phosphatase 1 regulatory subunit 7 OS=Mus musculus OX=10090 GN=Ppp1r7 PE=1 SV=2
P35279;P35279-2;P61294	3	1	0.00025077	-9.6945	23703.9	Ras-related protein Rab-6A OS=Mus musculus OX=10090 GN=Rab6a PE=1 SV=4
O35963	3	1	0.001291	1.62222	26222.9	Ras-related protein Rab-33B OS=Mus musculus OX=10090 GN=Rab33b PE=1 SV=1
Q7TPM6	3	1	0.0166499	-1.66707	55981.4	Fibronectin type III and SPRY domain-containing protein 1 OS=Mus musculus OX=10090 GN=Fsd1 PE=1 SV=1
Q6R0H7;Q6R0H7-4;P63094;P63094-2	3	1	6.08794e-05	1.65147	122589	Guanine nucleotide-binding protein G(s) subunit alpha isoforms XLas OS=Mus musculus OX=10090 GN=Gnas PE=1 SV=1
Q99PF4;Q99PF4-2;Q99PF4-4;Q99PF4-5;Q99PF4-6	3	2	0.0237375	-1.58789	370307	Cadherin-23 OS=Mus musculus OX=10090 GN=Cdh23 PE=1 SV=2
P60469-2;P60469	3	2	0.000427077	1.94712	116737	Isoform 2 of Liprin-alpha-3 OS=Mus musculus OX=10090 GN=Ppfia3
P97868;P97868-2	3	1	0.0349724	1.5026	200614	E3 ubiquitin-protein ligase RBBP6 OS=Mus musculus OX=10090 GN=Rbbp6 PE=1 SV=5
Q9R1Q8	3	1	1.69003e-05	1.86792	22641.8	Transgelin-3 OS=Mus musculus OX=10090 GN=Tagln3 PE=1 SV=1
Q63810;Q63810-2	3	1	0.00235698	-1.75787	19414	Calcineurin subunit B type 1 OS=Mus musculus OX=10090 GN=Ppp3r1 PE=1 SV=3
P61164	3	1	1.11642e-08	-3.40441	42727.9	Alpha-centractin OS=Mus musculus OX=10090 GN=Actr1a PE=1 SV=1
Q9JKK7;Q9JKK7-2	3	2	0.00932335	2.04605	39510.9	Tropomodulin-2 OS=Mus musculus OX=10090 GN=Tmod2 PE=1 SV=2
Q7TQI3	3	2	4.41589e-11	3.1292	31498.2	Ubiquitin thioesterase OTUB1 OS=Mus musculus OX=10090 GN=Otub1 PE=1 SV=2
Q08331	3	2	0.00706665	-1.6602	31486.8	Calretinin OS=Mus musculus OX=10090 GN=Calb2 PE=1 SV=3
P59999	3	2	0.000353618	1.61427	19781.1	Actin-related protein 2/3 complex subunit 4 OS=Mus musculus OX=10090 GN=Arpc4 PE=1 SV=3
Q61206	3	3	2.31723e-08	1.8806	25752.5	Platelet-activating factor acetylhydrolase IB subunit alpha2 OS=Mus musculus OX=10090 GN=Pafah1b2 PE=1 SV=2
D3Z7P3;D3Z7P3-2	4	3	5.10397e-07	2.16761	74819.3	Glutaminase kidney isoform_ mitochondrial OS=Mus musculus OX=10090 GN=Gls PE=1 SV=1
Q8K386	4	1	1.56216e-05	-8.55342	24603.6	Ras-related protein Rab-15 OS=Mus musculus OX=10090 GN=Rab15 PE=1 SV=1
Q8CG50	4	2	0.00218318	2.01354	23491.4	Ras-related protein Rab-43 OS=Mus musculus OX=10090 GN=Rab43 PE=1 SV=1
Q9QYC0;Q9QYC0-2	4	1	1.47502e-08	2.51971	81045.8	Alpha-adducin OS=Mus musculus OX=10090 GN=Add1 PE=1 SV=2
Q641P0;Q641P0-2	4	2	0.000339133	-1.51771	48093	Actin-related protein 3B OS=Mus musculus OX=10090 GN=Actr3b PE=1 SV=1
P61089	4	1	0.000110568	-5.04335	17194.9	Ubiquitin-conjugating enzyme E2 N OS=Mus musculus OX=10090 GN=Ube2n PE=1 SV=1
P35917	4	2	0.000189449	1.77689	155127	Vascular endothelial growth factor receptor 3 OS=Mus musculus OX=10090 GN=Flt4 PE=1 SV=1
P26883	4	2	0.000180171	2.05239	11979.7	Peptidyl-prolyl cis-trans isomerase FKBP1A OS=Mus musculus OX=10090 GN=Fkbp1a PE=1 SV=2
Q6PHZ2;Q6PHZ2-2;Q6PHZ2-4;Q6PHZ2-5	4	1	0.00818862	-1.83377	56996.8	Calcium/calmodulin-dependent protein kinase type II subunit delta OS=Mus musculus OX=10090 GN=Camk2d PE=1 SV=1
P26645	4	4	7.90482e-06	-4.7715	29718.4	Myristoylated alanine-rich C-kinase substrate OS=Mus musculus OX=10090 GN=Marcks PE=1 SV=2
A2AVA0;A2AVA0-2	4	2	0.000549641	1.79559	402171	Sushi_ von Willebrand factor type A_ EGF and pentraxin domain-containing protein 1 OS=Mus musculus OX=10090 GN=Svep1 PE=1 SV=1
P00920	4	2	4.43642e-07	1.75891	29146.6	Carbonic anhydrase 2 OS=Mus musculus OX=10090 GN=Ca2 PE=1 SV=4
Q8CHH9;Q8CHH9-2	4	2	5.65026e-07	1.77071	50154.6	Septin-8 OS=Mus musculus OX=10090 GN=Septin8 PE=1 SV=4
P12382	4	2	6.37077e-09	1.81633	86158.4	ATP-dependent 6-phosphofructokinase_ liver type OS=Mus musculus OX=10090 GN=Pfkl PE=1 SV=4
E9Q784	4	3	0.000830079	1.53092	204497	Zinc finger CCCH domain-containing protein 13 OS=Mus musculus OX=10090 GN=Zc3h13 PE=1 SV=1
Q3KNY0;Q3KNY0-2	4	3	0.0158189	1.55091	306681	Immunoglobulin-like and fibronectin type III domain-containing protein 1 OS=Mus musculus OX=10090 GN=Igfn1 PE=1 SV=3
P60487	4	1	1.16021e-05	1.82163	31911.1	Chronophin OS=Mus musculus OX=10090 GN=Pdxp PE=1 SV=1
Q6P8J7	5	2	6.76927e-07	-2.07031	47929.6	Creatine kinase S-type_ mitochondrial OS=Mus musculus OX=10090 GN=Ckmt2 PE=1 SV=1
P55258	5	1	0.0104179	1.53299	23839.3	Ras-related protein Rab-8A OS=Mus musculus OX=10090 GN=Rab8a PE=1 SV=2
O88569;O88569-2;O88569-3	5	2	0.0121018	1.87861	37459.8	Heterogeneous nuclear ribonucleoproteins A2/B1 OS=Mus musculus OX=10090 GN=Hnrnpa2b1 PE=1 SV=2
Q9QYG0;Q9QYG0-2	5	3	1.45891e-07	1.67542	41131.5	Protein NDRG2 OS=Mus musculus OX=10090 GN=Ndrg2 PE=1 SV=1
Q8BZ98;Q8BZ98-2	5	1	0.00051177	-2.14818	97589.8	Dynamin-3 OS=Mus musculus OX=10090 GN=Dnm3 PE=1 SV=1
P62715;P63330	5	4	2.35276e-06	1.91131	36145.4	Serine/threonine-protein phosphatase 2A catalytic subunit beta isoform OS=Mus musculus OX=10090 GN=Ppp2cb PE=1 SV=1
Q6ZQ38	5	2	9.70097e-07	2.05237	138043	Cullin-associated NEDD8-dissociated protein 1 OS=Mus musculus OX=10090 GN=Cand1 PE=1 SV=2
Q80W21	5	1	0.0402159	-2.11283	25880.8	Glutathione S-transferase Mu 7 OS=Mus musculus OX=10090 GN=Gstm7 PE=1 SV=1
Q921M7	5	3	3.16502e-07	-1.93799	37061.2	CYFIP-related Rac1 interactor B OS=Mus musculus OX=10090 GN=Cyrib PE=1 SV=1
P48774	5	2	7.30933e-05	1.75849	27034.2	Glutathione S-transferase Mu 5 OS=Mus musculus OX=10090 GN=Gstm5 PE=1 SV=1
O35526	6	3	0.000149467	-1.60502	33225.6	Syntaxin-1A OS=Mus musculus OX=10090 GN=Stx1a PE=1 SV=3
Q7TQD2	6	3	1.27711e-05	1.96977	23745.7	Tubulin polymerization-promoting protein OS=Mus musculus OX=10090 GN=Tppp PE=1 SV=1
P27600	6	1	8.51885e-11	2.4584	44266.2	Guanine nucleotide-binding protein subunit alpha-12 OS=Mus musculus OX=10090 GN=Gna12 PE=1 SV=3
Q64467	6	1	2.09238e-05	-2.28328	48398.4	Glyceraldehyde-3-phosphate dehydrogenase_ testis-specific OS=Mus musculus OX=10090 GN=Gapdhs PE=1 SV=1
P56371	7	1	0.000143907	1.89795	24693.9	Ras-related protein Rab-4A OS=Mus musculus OX=10090 GN=Rab4a PE=1 SV=2
O35098	7	1	0.0292678	1.80379	62531.9	Dihydropyrimidinase-related protein 4 OS=Mus musculus OX=10090 GN=Dpysl4 PE=1 SV=1
Q91V12;Q91V12-2;Q91V12-4;Q91V12-3	7	3	3.44291e-07	1.79792	42993.2	Cytosolic acyl coenzyme A thioester hydrolase OS=Mus musculus OX=10090 GN=Acot7 PE=1 SV=2
Q8BVE3	7	2	0.000563661	1.72639	56311.3	V-type proton ATPase subunit H OS=Mus musculus OX=10090 GN=Atp6v1h PE=1 SV=1
P62821	7	4	1.67919e-06	1.82998	22905.9	Ras-related protein Rab-1A OS=Mus musculus OX=10090 GN=Rab1A PE=1 SV=3
Q61171	7	6	1.60829e-05	1.60641	21949.8	Peroxiredoxin-2 OS=Mus musculus OX=10090 GN=Prdx2 PE=1 SV=3
Q9R0Y5;Q9R0Y5-2	7	5	2.31398e-08	1.56613	21653.7	Adenylate kinase isoenzyme 1 OS=Mus musculus OX=10090 GN=Ak1 PE=1 SV=1
P35700;O08807	7	3	3.3304e-07	2.05949	22404.6	Peroxiredoxin-1 OS=Mus musculus OX=10090 GN=Prdx1 PE=1 SV=1
Q62048;Q62048-2	7	4	3.4522e-07	-3.37416	15111.2	Astrocytic phosphoprotein PEA-15 OS=Mus musculus OX=10090 GN=Pea15 PE=1 SV=1
P27773	7	1	3.58816e-05	2.05533	57134.7	Protein disulfide-isomerase A3 OS=Mus musculus OX=10090 GN=Pdia3 PE=1 SV=2
Q9JKM7	8	2	1.54082e-06	1.96175	24827	Ras-related protein Rab-37 OS=Mus musculus OX=10090 GN=Rab37 PE=1 SV=2
P63087;P63087-2	8	2	8.26019e-06	1.78131	37725.2	Serine/threonine-protein phosphatase PP1-gamma catalytic subunit OS=Mus musculus OX=10090 GN=Ppp1cc PE=1 SV=1
Q8K1M6;Q8K1M6-2;Q8K1M6-3;Q8K1M6-4;Q8K1M6-5	8	3	1.66961e-06	1.73179	83171.4	Dynamin-1-like protein OS=Mus musculus OX=10090 GN=Dnm1l PE=1 SV=2
Q9WUA3;Q9WUA3-2	8	3	0.0035448	-1.71317	86481.7	ATP-dependent 6-phosphofructokinase_ platelet type OS=Mus musculus OX=10090 GN=Pfkp PE=1 SV=1
P99029;P99029-2	9	5	1.28693e-06	1.62292	22239.7	Peroxiredoxin-5_ mitochondrial OS=Mus musculus OX=10090 GN=Prdx5 PE=1 SV=2
P06837	9	6	0.000245	-2.22049	23746.5	Neuromodulin OS=Mus musculus OX=10090 GN=Gap43 PE=1 SV=1
P10637-5;P10637-3;P10637-4	9	1	0.00915671	-1.64089	39074.7	Isoform Tau-D of Microtubule-associated protein tau OS=Mus musculus OX=10090 GN=Mapt
Q91V41	9	2	0.000549929	-1.53441	24125.1	Ras-related protein Rab-14 OS=Mus musculus OX=10090 GN=Rab14 PE=1 SV=3
Q8QZT1	9	5	1.2288e-05	-2.09146	45158.4	Acetyl-CoA acetyltransferase_ mitochondrial OS=Mus musculus OX=10090 GN=Acat1 PE=1 SV=1
O89053	9	8	0.00126065	-1.92091	51673.6	Coronin-1A OS=Mus musculus OX=10090 GN=Coro1a PE=1 SV=5
P12658	9	3	0.0116178	-1.6998	30222.2	Calbindin OS=Mus musculus OX=10090 GN=Calb1 PE=1 SV=2
Q9QXS6;Q9QXS6-2;Q9QXS6-3	9	6	0.00305183	1.63461	78028.3	Drebrin OS=Mus musculus OX=10090 GN=Dbn1 PE=1 SV=4
P58252	10	5	7.17336e-06	1.84522	96283.7	Elongation factor 2 OS=Mus musculus OX=10090 GN=Eef2 PE=1 SV=2
Q6PIE5	10	2	1.42369e-08	-9.32098	113529	Sodium/potassium-transporting ATPase subunit alpha-2 OS=Mus musculus OX=10090 GN=Atp1a2 PE=1 SV=1
P17879;Q61696	10	2	3.66736e-08	-2.55792	70461.5	Heat shock 70 kDa protein 1B OS=Mus musculus OX=10090 GN=Hspa1b PE=1 SV=3
Q91XV3	10	5	1.40719e-06	-2.18487	22086.6	Brain acid soluble protein 1 OS=Mus musculus OX=10090 GN=Basp1 PE=1 SV=3
P10649;P15626	10	3	1.10383e-08	2.0152	26084.1	Glutathione S-transferase Mu 1 OS=Mus musculus OX=10090 GN=Gstm1 PE=1 SV=2
O70456	10	3	0.00013319	1.62944	27820.1	14-3-3 protein sigma OS=Mus musculus OX=10090 GN=Sfn PE=1 SV=2
P42669	10	6	2.77394e-06	1.62056	34997.8	Transcriptional activator protein Pur-alpha OS=Mus musculus OX=10090 GN=Pura PE=1 SV=1
Q9D051	10	5	7.32371e-05	1.55416	39279.4	Pyruvate dehydrogenase E1 component subunit beta_ mitochondrial OS=Mus musculus OX=10090 GN=Pdhb PE=1 SV=1
P45591	10	5	0.00506803	-1.68414	18823.7	Cofilin-2 OS=Mus musculus OX=10090 GN=Cfl2 PE=1 SV=1
P62880	10	2	2.6992e-05	3.82766	38072.5	Guanine nucleotide-binding protein G(I)/G(S)/G(T) subunit beta-2 OS=Mus musculus OX=10090 GN=Gnb2 PE=1 SV=3
Q9Z2Q6;P28661;P28661-2;P28661-3;P28661-4;P28661-5	11	8	1.72635e-07	1.67714	43204.3	Septin-5 OS=Mus musculus OX=10090 GN=Septin5 PE=1 SV=2
P62823	11	3	0.0254233	3.28423	26100.3	Ras-related protein Rab-3C OS=Mus musculus OX=10090 GN=Rab3c PE=1 SV=1
P53657	12	5	1.94512e-11	2.10625	62650.9	Pyruvate kinase PKLR OS=Mus musculus OX=10090 GN=Pklr PE=1 SV=1
P61264	12	6	3.60499e-11	1.68975	33472.9	Syntaxin-1B OS=Mus musculus OX=10090 GN=Stx1b PE=1 SV=1
Q6PIC6;Q64436	12	3	0.0032218	-1.87462	113117	Sodium/potassium-transporting ATPase subunit alpha-3 OS=Mus musculus OX=10090 GN=Atp1a3 PE=1 SV=1
Q8BHC1	12	6	7.80275e-06	1.68221	24864.3	Ras-related protein Rab-39B OS=Mus musculus OX=10090 GN=Rab39b PE=1 SV=1
P21550	12	3	0.000391097	-2.09739	47367.1	Beta-enolase OS=Mus musculus OX=10090 GN=Eno3 PE=1 SV=3
A2AQ07	12	1	0.0003991	-3.60473	51125.4	Tubulin beta-1 chain OS=Mus musculus OX=10090 GN=Tubb1 PE=1 SV=1
O54983	12	7	2.58639e-05	1.71906	33694.4	Ketimine reductase mu-crystallin OS=Mus musculus OX=10090 GN=Crym PE=1 SV=1
Q62420	13	6	5.92391e-05	1.81972	40126.5	Endophilin-A1 OS=Mus musculus OX=10090 GN=Sh3gl2 PE=1 SV=2
P30275	13	7	1.70537e-06	1.6065	47403	Creatine kinase U-type_ mitochondrial OS=Mus musculus OX=10090 GN=Ckmt1 PE=1 SV=1
Q61316	14	3	0.000690236	-1.5564	94931.2	Heat shock 70 kDa protein 4 OS=Mus musculus OX=10090 GN=Hspa4 PE=1 SV=1
E9Q912-3;E9Q912;E9Q912-2	14	8	8.96063e-05	-1.58592	61420	Isoform 3 of Rap1 GTPase-GDP dissociation stimulator 1 OS=Mus musculus OX=10090 GN=Rap1gds1
Q9DBJ1	15	7	0.000399083	1.5005	28946.1	Phosphoglycerate mutase 1 OS=Mus musculus OX=10090 GN=Pgam1 PE=1 SV=3
P17742	15	7	1.89388e-05	1.61695	18142.5	Peptidyl-prolyl cis-trans isomerase A OS=Mus musculus OX=10090 GN=Ppia PE=1 SV=2
P17426;P17426-2	16	7	1.54222e-07	1.57795	108748	AP-2 complex subunit alpha-1 OS=Mus musculus OX=10090 GN=Ap2a1 PE=1 SV=1
P15105	16	10	0.000868167	1.55452	42861.1	Glutamine synthetase OS=Mus musculus OX=10090 GN=Glul PE=1 SV=6
Q76MZ3	18	12	1.79672e-06	1.66983	66121.1	Serine/threonine-protein phosphatase 2A 65 kDa regulatory subunit A alpha isoform OS=Mus musculus OX=10090 GN=Ppp2r1a PE=1 SV=3
P06151	19	11	0.000143592	-2.01216	36840.8	L-lactate dehydrogenase A chain OS=Mus musculus OX=10090 GN=Ldha PE=1 SV=3
P14152	19	11	7.10015e-05	-1.86261	36682.3	Malate dehydrogenase_ cytoplasmic OS=Mus musculus OX=10090 GN=Mdh1 PE=1 SV=3
P50516;P50516-2	20	13	5.70459e-07	1.58552	68668.4	V-type proton ATPase catalytic subunit A OS=Mus musculus OX=10090 GN=Atp6v1a PE=1 SV=2
P61982	20	11	2.01942e-08	1.92101	28473.7	14-3-3 protein gamma OS=Mus musculus OX=10090 GN=Ywhag PE=1 SV=2
Q9CZU6	20	14	9.92509e-05	-2.24018	52021.9	Citrate synthase_ mitochondrial OS=Mus musculus OX=10090 GN=Cs PE=1 SV=1
P05063	21	9	0.000228141	1.50767	39794.1	Fructose-bisphosphate aldolase C OS=Mus musculus OX=10090 GN=Aldoc PE=1 SV=4
P05202	21	14	9.3742e-06	1.78274	47810.7	Aspartate aminotransferase_ mitochondrial OS=Mus musculus OX=10090 GN=Got2 PE=1 SV=1
Q61548;Q61548-2;Q61548-3	22	13	4.33252e-06	1.58601	92136.7	Clathrin coat assembly protein AP180 OS=Mus musculus OX=10090 GN=Snap91 PE=1 SV=1
P16125	24	9	9.99366e-06	-3.81452	36857.5	L-lactate dehydrogenase B chain OS=Mus musculus OX=10090 GN=Ldhb PE=1 SV=2
O35643	24	6	0.000191533	-1.6674	104790	AP-1 complex subunit beta-1 OS=Mus musculus OX=10090 GN=Ap1b1 PE=1 SV=2
P08249	24	14	1.36594e-05	1.64625	36067.7	Malate dehydrogenase_ mitochondrial OS=Mus musculus OX=10090 GN=Mdh2 PE=1 SV=3
P02088;P02089	24	12	4.16667e-05	1.68282	15954.3	Hemoglobin subunit beta-1 OS=Mus musculus OX=10090 GN=Hbb-b1 PE=1 SV=2
P68368	24	6	9.52048e-08	1.895	50665.8	Tubulin alpha-4A chain OS=Mus musculus OX=10090 GN=Tuba4a PE=1 SV=1
P06745	28	17	3.99513e-06	1.81386	62995.1	Glucose-6-phosphate isomerase OS=Mus musculus OX=10090 GN=Gpi PE=1 SV=4
P17156	28	5	1.37203e-06	1.7783	69926.9	Heat shock-related 70 kDa protein 2 OS=Mus musculus OX=10090 GN=Hspa2 PE=1 SV=2
Q62261;Q62261-2	30	16	6.70268e-06	1.95372	275079	Spectrin beta chain_ non-erythrocytic 1 OS=Mus musculus OX=10090 GN=Sptbn1 PE=1 SV=2
P68134	31	10	0.000549379	1.57618	42393.3	Actin_ alpha skeletal muscle OS=Mus musculus OX=10090 GN=Acta1 PE=1 SV=1
P68373	35	10	0.000180021	1.54126	50593.8	Tubulin alpha-1C chain OS=Mus musculus OX=10090 GN=Tuba1c PE=1 SV=1
P17183	36	16	1.03532e-05	1.7442	47638.9	Gamma-enolase OS=Mus musculus OX=10090 GN=Eno2 PE=1 SV=2
Q9ERD7	37	9	6.2981e-06	1.55871	50875	Tubulin beta-3 chain OS=Mus musculus OX=10090 GN=Tubb3 PE=1 SV=1
Q04447	37	21	4.84975e-05	1.50345	42998.5	Creatine kinase B-type OS=Mus musculus OX=10090 GN=Ckb PE=1 SV=1
Q9D6F9	38	4	4.03257e-07	1.62663	50042.1	Tubulin beta-4A chain OS=Mus musculus OX=10090 GN=Tubb4a PE=1 SV=3
P05214	38	13	9.22568e-05	1.64647	50644	Tubulin alpha-3 chain OS=Mus musculus OX=10090 GN=Tuba3a PE=1 SV=1
P05064	39	20	4.00505e-05	-1.63649	39812.2	Fructose-bisphosphate aldolase A OS=Mus musculus OX=10090 GN=Aldoa PE=1 SV=2
P99024	41	5	2.89066e-08	1.86171	50127.2	Tubulin beta-5 chain OS=Mus musculus OX=10090 GN=Tubb5 PE=1 SV=1
P39053;P39053-5;P39053-6	41	3	0.00252014	-1.86626	98202.2	Dynamin-1 OS=Mus musculus OX=10090 GN=Dnm1 PE=1 SV=2
P11499	50	24	0.000226206	-1.6109	83623.5	Heat shock protein HSP 90-beta OS=Mus musculus OX=10090 GN=Hsp90ab1 PE=1 SV=3

## Sheet: Sheet_8_CT_Vs_PCPNIC_Male
Sheet S8. Complete list of deregulated proteins in PCPNIC males when compared to CT
				CT- / +PCPNIC
Accession	Peptide count	Unique peptides	Anova (p)	Fold change	Mass	Description
P02301;P84244	2	1	0.0485542	-1.92732	15372	Histone H3.3C OS=Mus musculus OX=10090 GN=H3-5 PE=3 SV=3
Q921I1	2	1	0.014553	1.56689	78890.9	Serotransferrin OS=Mus musculus OX=10090 GN=Tf PE=1 SV=1
Q8BG05;Q8BG05-2	2	1	0.0013082	-4.55082	39880.2	Heterogeneous nuclear ribonucleoprotein A3 OS=Mus musculus OX=10090 GN=Hnrnpa3 PE=1 SV=1
Q91X97	2	1	0.00266148	-2.04022	22359.4	Neurocalcin-delta OS=Mus musculus OX=10090 GN=Ncald PE=1 SV=4
P19157;P46425	2	2	0.000231594	2.14742	23780.3	Glutathione S-transferase P 1 OS=Mus musculus OX=10090 GN=Gstp1 PE=1 SV=2
Q8C790;Q8C790-2	2	1	0.000142189	-3.63327	34144.4	Protein FAM221A OS=Mus musculus OX=10090 GN=Fam221a PE=1 SV=1
P62774	2	1	1.19636e-06	-2.00531	13031.9	Myotrophin OS=Mus musculus OX=10090 GN=Mtpn PE=1 SV=2
P12023;P12023-2;P12023-3	2	1	0.000169602	3.05053	87748.7	Amyloid-beta precursor protein OS=Mus musculus OX=10090 GN=App PE=1 SV=3
P48758	2	1	5.00463e-05	14.5101	30926.4	Carbonyl reductase [NADPH] 1 OS=Mus musculus OX=10090 GN=Cbr1 PE=1 SV=3
Q99MP8;Q99MP8-2;Q99MP8-3	2	1	5.83714e-09	-4.11914	68245.9	BRCA1-associated protein OS=Mus musculus OX=10090 GN=Brap PE=1 SV=1
Q8BHD0	2	1	0.000226961	-3.95299	25376.8	Ras-related protein Rab-39A OS=Mus musculus OX=10090 GN=Rab39a PE=1 SV=1
P70349	2	1	5.72529e-06	-3.16377	13891	Adenosine 5'-monophosphoramidase HINT1 OS=Mus musculus OX=10090 GN=Hint1 PE=1 SV=3
Q8R5C5	2	1	0.000677913	2.85972	42395.5	Beta-centractin OS=Mus musculus OX=10090 GN=Actr1b PE=1 SV=1
Q9JM99;Q9JM99-2;Q9JM99-3;Q9JM99-4	2	2	3.01591e-07	-3.49908	117251	Proteoglycan 4 OS=Mus musculus OX=10090 GN=Prg4 PE=1 SV=2
Q8K2B3	2	1	0.000176888	-11.4785	73669	Succinate dehydrogenase [ubiquinone] flavoprotein subunit_ mitochondrial OS=Mus musculus OX=10090 GN=Sdha PE=1 SV=1
O70250	2	1	4.36215e-05	-14.1434	28998.2	Phosphoglycerate mutase 2 OS=Mus musculus OX=10090 GN=Pgam2 PE=1 SV=3
Q9CVB6	2	2	3.734e-06	2.01532	34471.2	Actin-related protein 2/3 complex subunit 2 OS=Mus musculus OX=10090 GN=Arpc2 PE=1 SV=3
Q9CQI6	2	1	0.00292657	-1.50109	16058	Coactosin-like protein OS=Mus musculus OX=10090 GN=Cotl1 PE=1 SV=3
P56399	2	1	0.000199879	-1.74658	96745.9	Ubiquitin carboxyl-terminal hydrolase 5 OS=Mus musculus OX=10090 GN=Usp5 PE=1 SV=1
P43006;P43006-2;P43006-3	2	1	0.000226336	2.10078	62543.6	Excitatory amino acid transporter 2 OS=Mus musculus OX=10090 GN=Slc1a2 PE=1 SV=1
P97953;P97953-2;P97953-3;P97953-4	2	1	1.85174e-06	2.99898	48695.2	Vascular endothelial growth factor C OS=Mus musculus OX=10090 GN=Vegfc PE=1 SV=1
Q9CPU0	2	2	5.05186e-08	3.28896	20980.7	Lactoylglutathione lyase OS=Mus musculus OX=10090 GN=Glo1 PE=1 SV=3
Q9DAF3	2	1	0.0118273	11.9012	46226.3	Protein DDI1 homolog 1 OS=Mus musculus OX=10090 GN=Ddi1 PE=1 SV=1
Q80TL4;Q80TL4-2	2	2	0.00110499	-1.72823	45964.3	PHD finger protein 24 OS=Mus musculus OX=10090 GN=Phf24 PE=1 SV=2
Q9CQ60	2	2	0.0012329	1.99451	27482.6	6-phosphogluconolactonase OS=Mus musculus OX=10090 GN=Pgls PE=1 SV=1
Q63810;Q63810-2	3	1	0.000309064	-2.82169	19414	Calcineurin subunit B type 1 OS=Mus musculus OX=10090 GN=Ppp3r1 PE=1 SV=3
O35963	3	1	0.000189999	-1.94001	26222.9	Ras-related protein Rab-33B OS=Mus musculus OX=10090 GN=Rab33b PE=1 SV=1
Q7TPM6	3	1	0.000448703	9.28973	55981.4	Fibronectin type III and SPRY domain-containing protein 1 OS=Mus musculus OX=10090 GN=Fsd1 PE=1 SV=1
P10630;P10630-2	3	1	1.74595e-05	4.98144	46630.5	Eukaryotic initiation factor 4A-II OS=Mus musculus OX=10090 GN=Eif4a2 PE=1 SV=2
Q99PF4;Q99PF4-2;Q99PF4-4;Q99PF4-5;Q99PF4-6	3	2	0.00224063	5.03054	370307	Cadherin-23 OS=Mus musculus OX=10090 GN=Cdh23 PE=1 SV=2
Q9R0P5	3	1	3.84943e-05	-2.0561	18863.8	Destrin OS=Mus musculus OX=10090 GN=Dstn PE=1 SV=3
Q8CGK7	3	1	0.00541557	2.15787	44821.8	Guanine nucleotide-binding protein G(olf) subunit alpha OS=Mus musculus OX=10090 GN=Gnal PE=1 SV=1
Q61206	3	3	0.000586694	1.81399	25752.5	Platelet-activating factor acetylhydrolase IB subunit alpha2 OS=Mus musculus OX=10090 GN=Pafah1b2 PE=1 SV=2
Q08331	3	2	4.90383e-05	-3.16836	31486.8	Calretinin OS=Mus musculus OX=10090 GN=Calb2 PE=1 SV=3
Q64433	3	3	9.61509e-05	-2.26372	10962.7	10 kDa heat shock protein_ mitochondrial OS=Mus musculus OX=10090 GN=Hspe1 PE=1 SV=2
Q9ES97;Q9ES97-2;Q9ES97-5;Q9ES97-3;Q9ES97-4	3	2	0.00257277	-2.54138	104506	Reticulon-3 OS=Mus musculus OX=10090 GN=Rtn3 PE=1 SV=2
Q7TQI3	3	2	6.51089e-05	2.50721	31498.2	Ubiquitin thioesterase OTUB1 OS=Mus musculus OX=10090 GN=Otub1 PE=1 SV=2
P14211	3	2	0.000164799	2.51728	48165.7	Calreticulin OS=Mus musculus OX=10090 GN=Calr PE=1 SV=1
P31938	3	2	0.000205289	4.97931	43816.3	Dual specificity mitogen-activated protein kinase kinase 1 OS=Mus musculus OX=10090 GN=Map2k1 PE=1 SV=2
P23506;P23506-2	3	2	4.19737e-06	-1.99721	24691.5	Protein-L-isoaspartate(D-aspartate) O-methyltransferase OS=Mus musculus OX=10090 GN=Pcmt1 PE=1 SV=3
P61164	3	1	0.006035	-2.22253	42727.9	Alpha-centractin OS=Mus musculus OX=10090 GN=Actr1a PE=1 SV=1
P26883	4	2	0.000147644	-1.70257	11979.7	Peptidyl-prolyl cis-trans isomerase FKBP1A OS=Mus musculus OX=10090 GN=Fkbp1a PE=1 SV=2
Q641P0;Q641P0-2	4	2	4.8648e-06	-2.12311	48093	Actin-related protein 3B OS=Mus musculus OX=10090 GN=Actr3b PE=1 SV=1
D3Z7P3;D3Z7P3-2	4	3	1.14991e-05	2.86959	74819.3	Glutaminase kidney isoform_ mitochondrial OS=Mus musculus OX=10090 GN=Gls PE=1 SV=1
Q61207	4	2	5.6377e-08	4.83964	63304.1	Prosaposin OS=Mus musculus OX=10090 GN=Psap PE=1 SV=2
P48722;P48722-2	4	1	2.01307e-05	3.1076	95237.7	Heat shock 70 kDa protein 4L OS=Mus musculus OX=10090 GN=Hspa4l PE=1 SV=2
P02104	4	2	0.00160211	1.85331	16193.7	Hemoglobin subunit epsilon-Y2 OS=Mus musculus OX=10090 GN=Hbb-y PE=1 SV=2
Q9QYC0;Q9QYC0-2	4	1	0.000463459	2.06178	81045.8	Alpha-adducin OS=Mus musculus OX=10090 GN=Add1 PE=1 SV=2
P62984;P0CG49;P0CG50;P62983	4	3	9.01986e-06	-1.7116	15013.5	Ubiquitin-60S ribosomal protein L40 OS=Mus musculus OX=10090 GN=Uba52 PE=1 SV=2
Q8CG50	4	2	0.0130374	1.89185	23491.4	Ras-related protein Rab-43 OS=Mus musculus OX=10090 GN=Rab43 PE=1 SV=1
P35917	4	2	0.00266639	1.80388	155127	Vascular endothelial growth factor receptor 3 OS=Mus musculus OX=10090 GN=Flt4 PE=1 SV=1
A2AVA0;A2AVA0-2	4	2	0.00211641	1.98766	402171	Sushi_ von Willebrand factor type A_ EGF and pentraxin domain-containing protein 1 OS=Mus musculus OX=10090 GN=Svep1 PE=1 SV=1
B2RSH2	4	1	0.00342275	2.69129	40931.4	Guanine nucleotide-binding protein G(i) subunit alpha-1 OS=Mus musculus OX=10090 GN=Gnai1 PE=1 SV=1
Q571H0;Q571H0-2	4	2	0.0032707	2.02057	256724	Nucleolar pre-ribosomal-associated protein 1 OS=Mus musculus OX=10090 GN=Urb1 PE=1 SV=2
Q6PHZ2;Q6PHZ2-2;Q6PHZ2-4;Q6PHZ2-5	4	1	7.12761e-05	-4.64848	56996.8	Calcium/calmodulin-dependent protein kinase type II subunit delta OS=Mus musculus OX=10090 GN=Camk2d PE=1 SV=1
P26645	4	4	7.51898e-07	-14.6505	29718.4	Myristoylated alanine-rich C-kinase substrate OS=Mus musculus OX=10090 GN=Marcks PE=1 SV=2
P60487	4	1	8.54029e-06	-1.55886	31911.1	Chronophin OS=Mus musculus OX=10090 GN=Pdxp PE=1 SV=1
Q91YH6	4	1	7.15039e-05	-1.79179	57189.9	V-type proton ATPase subunit B_ kidney isoform OS=Mus musculus OX=10090 GN=Atp6v1b1 PE=1 SV=1
P08752	5	2	0.000155533	-2.01522	41059.3	Guanine nucleotide-binding protein G(i) subunit alpha-2 OS=Mus musculus OX=10090 GN=Gnai2 PE=1 SV=5
Q921M7	5	3	0.00264671	-1.54672	37061.2	CYFIP-related Rac1 interactor B OS=Mus musculus OX=10090 GN=Cyrib PE=1 SV=1
Q8K0U4	5	2	9.77076e-06	2.52655	75213.7	Heat shock 70 kDa protein 12A OS=Mus musculus OX=10090 GN=Hspa12a PE=1 SV=1
P55258	5	1	0.00150526	1.93417	23839.3	Ras-related protein Rab-8A OS=Mus musculus OX=10090 GN=Rab8a PE=1 SV=2
Q8BZ98;Q8BZ98-2	5	1	0.00213226	-2.52158	97589.8	Dynamin-3 OS=Mus musculus OX=10090 GN=Dnm3 PE=1 SV=1
Q9QYG0;Q9QYG0-2	5	3	0.000329658	1.80659	41131.5	Protein NDRG2 OS=Mus musculus OX=10090 GN=Ndrg2 PE=1 SV=1
O88569;O88569-2;O88569-3	5	2	0.0203812	2.40187	37459.8	Heterogeneous nuclear ribonucleoproteins A2/B1 OS=Mus musculus OX=10090 GN=Hnrnpa2b1 PE=1 SV=2
Q6ZQ38	5	2	0.000707327	2.00877	138043	Cullin-associated NEDD8-dissociated protein 1 OS=Mus musculus OX=10090 GN=Cand1 PE=1 SV=2
Q6P8J7	5	2	3.80476e-06	-4.02724	47929.6	Creatine kinase S-type_ mitochondrial OS=Mus musculus OX=10090 GN=Ckmt2 PE=1 SV=1
P35486	6	2	1.31137e-05	4.85795	43916.1	Pyruvate dehydrogenase E1 component subunit alpha_ somatic form_ mitochondrial OS=Mus musculus OX=10090 GN=Pdha1 PE=1 SV=1
Q7TQD2	6	3	0.00218682	1.77172	23745.7	Tubulin polymerization-promoting protein OS=Mus musculus OX=10090 GN=Tppp PE=1 SV=1
O55042;O55042-2	6	2	0.000266985	-5.88664	14485.3	Alpha-synuclein OS=Mus musculus OX=10090 GN=Snca PE=1 SV=2
Q5M8N0	6	2	0.00642324	1.76808	18726.4	CB1 cannabinoid receptor-interacting protein 1 OS=Mus musculus OX=10090 GN=Cnrip1 PE=1 SV=1
Q63844	6	1	2.13117e-05	-1.95156	43408.7	Mitogen-activated protein kinase 3 OS=Mus musculus OX=10090 GN=Mapk3 PE=1 SV=5
Q9EQF6	6	5	5.57624e-07	-2.55354	62086.8	Dihydropyrimidinase-related protein 5 OS=Mus musculus OX=10090 GN=Dpysl5 PE=1 SV=1
Q8CI94	6	3	1.09998e-05	-1.70776	97414.4	Glycogen phosphorylase_ brain form OS=Mus musculus OX=10090 GN=Pygb PE=1 SV=3
P62141	7	2	7.70674e-06	-2.15435	37985.3	Serine/threonine-protein phosphatase PP1-beta catalytic subunit OS=Mus musculus OX=10090 GN=Ppp1cb PE=1 SV=3
Q62048;Q62048-2	7	4	8.42659e-14	-8.26204	15111.2	Astrocytic phosphoprotein PEA-15 OS=Mus musculus OX=10090 GN=Pea15 PE=1 SV=1
Q99PT1	7	4	8.6234e-05	-2.04632	23464.5	Rho GDP-dissociation inhibitor 1 OS=Mus musculus OX=10090 GN=Arhgdia PE=1 SV=3
Q62277	7	2	0.00179861	-2.08794	34309.8	Synaptophysin OS=Mus musculus OX=10090 GN=Syp PE=1 SV=2
P61750	7	1	0.000200613	2.5076	20510.7	ADP-ribosylation factor 4 OS=Mus musculus OX=10090 GN=Arf4 PE=1 SV=2
P08113	7	3	4.61983e-05	-2.16965	92761.1	Endoplasmin OS=Mus musculus OX=10090 GN=Hsp90b1 PE=1 SV=2
P61027	8	7	3.12481e-07	-2.19453	22769.1	Ras-related protein Rab-10 OS=Mus musculus OX=10090 GN=Rab10 PE=1 SV=1
P62137	8	1	1.01652e-07	-1.64861	38281.5	Serine/threonine-protein phosphatase PP1-alpha catalytic subunit OS=Mus musculus OX=10090 GN=Ppp1ca PE=1 SV=1
P63087;P63087-2	8	2	1.72075e-05	-1.58067	37725.2	Serine/threonine-protein phosphatase PP1-gamma catalytic subunit OS=Mus musculus OX=10090 GN=Ppp1cc PE=1 SV=1
Q9D1G1	8	2	1.24328e-10	-2.29417	22358.3	Ras-related protein Rab-1B OS=Mus musculus OX=10090 GN=Rab1b PE=1 SV=1
Q9WUA3;Q9WUA3-2	8	3	8.49887e-06	-3.44004	86481.7	ATP-dependent 6-phosphofructokinase_ platelet type OS=Mus musculus OX=10090 GN=Pfkp PE=1 SV=1
Q9Z0P4;Q9Z0P4-2	8	3	1.58652e-05	-1.50714	41785.5	Paralemmin-1 OS=Mus musculus OX=10090 GN=Palm PE=1 SV=1
P84084	8	2	0.00328174	2.00684	20643.8	ADP-ribosylation factor 5 OS=Mus musculus OX=10090 GN=Arf5 PE=1 SV=2
P48453;P48453-2	8	1	1.66082e-08	-2.30566	59857.9	Serine/threonine-protein phosphatase 2B catalytic subunit beta isoform OS=Mus musculus OX=10090 GN=Ppp3cb PE=1 SV=2
Q99JY9	9	5	2.74176e-06	-1.5589	47813.4	Actin-related protein 3 OS=Mus musculus OX=10090 GN=Actr3 PE=1 SV=3
P12658	9	3	0.000533043	-2.85615	30222.2	Calbindin OS=Mus musculus OX=10090 GN=Calb1 PE=1 SV=2
O89053	9	8	1.34207e-08	-3.57108	51673.6	Coronin-1A OS=Mus musculus OX=10090 GN=Coro1a PE=1 SV=5
Q8QZT1	9	5	2.958e-10	-3.64187	45158.4	Acetyl-CoA acetyltransferase_ mitochondrial OS=Mus musculus OX=10090 GN=Acat1 PE=1 SV=1
P10637-5;P10637-3;P10637-4	9	1	2.11634e-05	-4.0832	39074.7	Isoform Tau-D of Microtubule-associated protein tau OS=Mus musculus OX=10090 GN=Mapt
Q8K183	9	5	0.00295857	1.57077	35300.4	Pyridoxal kinase OS=Mus musculus OX=10090 GN=Pdxk PE=1 SV=1
P06837	9	6	2.26899e-06	-4.50824	23746.5	Neuromodulin OS=Mus musculus OX=10090 GN=Gap43 PE=1 SV=1
P62880	10	2	0.000309854	5.03111	38072.5	Guanine nucleotide-binding protein G(I)/G(S)/G(T) subunit beta-2 OS=Mus musculus OX=10090 GN=Gnb2 PE=1 SV=3
P58252	10	5	0.00224728	1.81445	96283.7	Elongation factor 2 OS=Mus musculus OX=10090 GN=Eef2 PE=1 SV=2
P62897	10	7	5.61847e-06	-1.6446	11719.5	Cytochrome c_ somatic OS=Mus musculus OX=10090 GN=Cycs PE=1 SV=2
Q9D0K2	10	5	1.97708e-05	2.31678	56387.9	Succinyl-CoA:3-ketoacid coenzyme A transferase 1_ mitochondrial OS=Mus musculus OX=10090 GN=Oxct1 PE=1 SV=1
P45591	10	5	1.79207e-05	-4.28699	18823.7	Cofilin-2 OS=Mus musculus OX=10090 GN=Cfl2 PE=1 SV=1
Q91XV3	10	5	7.18269e-08	-5.53461	22086.6	Brain acid soluble protein 1 OS=Mus musculus OX=10090 GN=Basp1 PE=1 SV=3
Q8VDN2	10	3	2.69183e-07	-2.11302	114294	Sodium/potassium-transporting ATPase subunit alpha-1 OS=Mus musculus OX=10090 GN=Atp1a1 PE=1 SV=1
P10126	11	4	2.0165e-05	-1.92745	50456.1	Elongation factor 1-alpha 1 OS=Mus musculus OX=10090 GN=Eef1a1 PE=1 SV=3
Q9D6R2;Q9D6R2-2	11	3	1.92305e-06	-1.54189	40095	Isocitrate dehydrogenase [NAD] subunit alpha_ mitochondrial OS=Mus musculus OX=10090 GN=Idh3a PE=1 SV=1
Q7TQF7	11	6	4.89249e-06	-1.71703	75127.3	Amphiphysin OS=Mus musculus OX=10090 GN=Amph PE=1 SV=1
P50518	11	4	8.33347e-10	-3.07242	26214.5	V-type proton ATPase subunit E 1 OS=Mus musculus OX=10090 GN=Atp6v1e1 PE=1 SV=2
O08709	12	5	1.17976e-05	-1.79371	24984.7	Peroxiredoxin-6 OS=Mus musculus OX=10090 GN=Prdx6 PE=1 SV=3
Q6PIC6;Q64436	12	3	0.000465658	-2.69766	113117	Sodium/potassium-transporting ATPase subunit alpha-3 OS=Mus musculus OX=10090 GN=Atp1a3 PE=1 SV=1
P61264	12	6	0.00186319	1.5728	33472.9	Syntaxin-1B OS=Mus musculus OX=10090 GN=Stx1b PE=1 SV=1
Q62420	13	6	0.0111193	1.65704	40126.5	Endophilin-A1 OS=Mus musculus OX=10090 GN=Sh3gl2 PE=1 SV=2
Q3ULJ0;Q3ULJ0-2	13	1	0.0257822	-2.56016	38852.9	Glycerol-3-phosphate dehydrogenase 1-like protein OS=Mus musculus OX=10090 GN=Gpd1l PE=1 SV=2
P28652	14	2	0.00154601	-4.9508	61202.3	Calcium/calmodulin-dependent protein kinase type II subunit beta OS=Mus musculus OX=10090 GN=Camk2b PE=1 SV=2
P20029	14	6	2.16194e-09	-2.86108	72536.2	Endoplasmic reticulum chaperone BiP OS=Mus musculus OX=10090 GN=Hspa5 PE=1 SV=3
E9Q912-3;E9Q912;E9Q912-2	14	8	3.92171e-06	-1.79725	61420	Isoform 3 of Rap1 GTPase-GDP dissociation stimulator 1 OS=Mus musculus OX=10090 GN=Rap1gds1
Q61316	14	3	7.18161e-05	-2.40516	94931.2	Heat shock 70 kDa protein 4 OS=Mus musculus OX=10090 GN=Hspa4 PE=1 SV=1
P16627	14	6	1.56071e-06	-1.83932	71036.6	Heat shock 70 kDa protein 1-like OS=Mus musculus OX=10090 GN=Hspa1l PE=1 SV=4
P18872	14	2	0.000978021	2.8667	40654.9	Guanine nucleotide-binding protein G(o) subunit alpha OS=Mus musculus OX=10090 GN=Gnao1 PE=1 SV=3
P40124	14	6	2.74471e-05	-2.01934	51907.1	Adenylyl cyclase-associated protein 1 OS=Mus musculus OX=10090 GN=Cap1 PE=1 SV=4
P62814	15	6	6.94915e-05	1.92421	56893.1	V-type proton ATPase subunit B_ brain isoform OS=Mus musculus OX=10090 GN=Atp6v1b2 PE=1 SV=1
P09041	16	4	9.53545e-08	-2.04301	45252.3	Phosphoglycerate kinase 2 OS=Mus musculus OX=10090 GN=Pgk2 PE=1 SV=4
Q61644	16	8	5.20533e-06	-2.08992	50917.5	Protein kinase C and casein kinase substrate in neurons protein 1 OS=Mus musculus OX=10090 GN=Pacsin1 PE=1 SV=1
Q3UX10	16	6	3.77742e-06	-1.71521	50729.6	Tubulin alpha chain-like 3 OS=Mus musculus OX=10090 GN=Tubal3 PE=2 SV=2
P68254;P68254-2	17	8	1.03861e-07	-1.86223	28063.5	14-3-3 protein theta OS=Mus musculus OX=10090 GN=Ywhaq PE=1 SV=1
Q7TPR4	17	4	3.89844e-06	-1.50179	103696	Alpha-actinin-1 OS=Mus musculus OX=10090 GN=Actn1 PE=1 SV=1
P11798;P11798-2	18	5	0.00125405	2.07792	54685.1	Calcium/calmodulin-dependent protein kinase type II subunit alpha OS=Mus musculus OX=10090 GN=Camk2a PE=1 SV=2
P63085	18	8	1.13392e-05	-1.91049	41674.9	Mitogen-activated protein kinase 1 OS=Mus musculus OX=10090 GN=Mapk1 PE=1 SV=3
P62631	19	10	0.000154791	-1.87385	50796.4	Elongation factor 1-alpha 2 OS=Mus musculus OX=10090 GN=Eef1a2 PE=1 SV=1
P06151	19	11	2.50962e-06	-3.63325	36840.8	L-lactate dehydrogenase A chain OS=Mus musculus OX=10090 GN=Ldha PE=1 SV=3
Q9R0P9	19	9	2.15686e-05	-1.8954	25180.5	Ubiquitin carboxyl-terminal hydrolase isozyme L1 OS=Mus musculus OX=10090 GN=Uchl1 PE=1 SV=1
P14152	19	11	2.20298e-06	-3.49502	36682.3	Malate dehydrogenase_ cytoplasmic OS=Mus musculus OX=10090 GN=Mdh1 PE=1 SV=3
P63328;P63328-2;P48455	19	8	7.67721e-07	-1.83382	59328.2	Serine/threonine-protein phosphatase 2B catalytic subunit alpha isoform OS=Mus musculus OX=10090 GN=Ppp3ca PE=1 SV=1
P26443	20	12	1.31373e-12	-2.44749	61679.1	Glutamate dehydrogenase 1_ mitochondrial OS=Mus musculus OX=10090 GN=Glud1 PE=1 SV=1
P61982	20	11	0.000140393	2.33025	28473.7	14-3-3 protein gamma OS=Mus musculus OX=10090 GN=Ywhag PE=1 SV=2
Q9CZU6	20	14	2.66103e-08	-2.87271	52021.9	Citrate synthase_ mitochondrial OS=Mus musculus OX=10090 GN=Cs PE=1 SV=1
Q9Z0E0;Q9Z0E0-2	20	12	1.46549e-14	-3.42799	80321.1	Neurochondrin OS=Mus musculus OX=10090 GN=Ncdn PE=1 SV=1
Q61548;Q61548-2;Q61548-3	22	13	0.018822	1.54424	92136.7	Clathrin coat assembly protein AP180 OS=Mus musculus OX=10090 GN=Snap91 PE=1 SV=1
P17710;P17710-3;P17710-4;P17710-2	22	13	7.69438e-06	-1.83995	109615	Hexokinase-1 OS=Mus musculus OX=10090 GN=Hk1 PE=1 SV=3
P46096	22	7	0.00044683	-2.34764	47760.2	Synaptotagmin-1 OS=Mus musculus OX=10090 GN=Syt1 PE=1 SV=1
Q922F4	23	3	6.65163e-08	-2.67139	50546.7	Tubulin beta-6 chain OS=Mus musculus OX=10090 GN=Tubb6 PE=1 SV=1
P68368	24	6	0.00140915	1.7054	50665.8	Tubulin alpha-4A chain OS=Mus musculus OX=10090 GN=Tuba4a PE=1 SV=1
Q9R111	24	15	2.61321e-08	-1.89063	51526.4	Guanine deaminase OS=Mus musculus OX=10090 GN=Gda PE=1 SV=1
O35643	24	6	3.7484e-07	-3.71845	104790	AP-1 complex subunit beta-1 OS=Mus musculus OX=10090 GN=Ap1b1 PE=1 SV=2
P16125	24	9	1.69024e-06	-7.99077	36857.5	L-lactate dehydrogenase B chain OS=Mus musculus OX=10090 GN=Ldhb PE=1 SV=2
Q8BFZ3	25	7	2.20239e-09	-2.5774	42346.5	Beta-actin-like protein 2 OS=Mus musculus OX=10090 GN=Actbl2 PE=1 SV=1
P09411	27	11	1.76297e-06	-1.7729	44949.8	Phosphoglycerate kinase 1 OS=Mus musculus OX=10090 GN=Pgk1 PE=1 SV=4
Q62188	27	14	7.89268e-05	-1.51696	62335.6	Dihydropyrimidinase-related protein 3 OS=Mus musculus OX=10090 GN=Dpysl3 PE=1 SV=1
O88935;O88935-1;O88935-3	28	12	1.85167e-06	-1.63595	74268.5	Synapsin-1 OS=Mus musculus OX=10090 GN=Syn1 PE=1 SV=2
P97427	28	18	4.44649e-08	-2.03089	62510	Dihydropyrimidinase-related protein 1 OS=Mus musculus OX=10090 GN=Crmp1 PE=1 SV=1
P56480	28	17	6.64318e-06	-2.74737	56300.6	ATP synthase subunit beta_ mitochondrial OS=Mus musculus OX=10090 GN=Atp5f1b PE=1 SV=2
P63038;P63038-2	29	13	4.77372e-07	-1.83584	61126.7	60 kDa heat shock protein_ mitochondrial OS=Mus musculus OX=10090 GN=Hspd1 PE=1 SV=1
Q62261;Q62261-2	30	16	0.0402162	1.50025	275079	Spectrin beta chain_ non-erythrocytic 1 OS=Mus musculus OX=10090 GN=Sptbn1 PE=1 SV=2
P17427	31	13	1.69594e-05	-1.85052	104929	AP-2 complex subunit alpha-2 OS=Mus musculus OX=10090 GN=Ap2a2 PE=1 SV=2
P16858	31	15	5.44507e-07	-2.62162	36095.2	Glyceraldehyde-3-phosphate dehydrogenase OS=Mus musculus OX=10090 GN=Gapdh PE=1 SV=2
Q01853	32	12	4.25952e-06	-1.66852	90006.3	Transitional endoplasmic reticulum ATPase OS=Mus musculus OX=10090 GN=Vcp PE=1 SV=4
P52480-2	35	5	5.87358e-08	-1.939	58498.5	Isoform M1 of Pyruvate kinase PKM OS=Mus musculus OX=10090 GN=Pkm
Q7TMM9	37	2	0.000530252	1.65459	50306.3	Tubulin beta-2A chain OS=Mus musculus OX=10090 GN=Tubb2a PE=1 SV=1
P39053-4	37	1	2.95909e-09	-2.41704	97823.7	Isoform 4 of Dynamin-1 OS=Mus musculus OX=10090 GN=Dnm1
P39053-3	37	1	6.33621e-06	-1.92849	96269.8	Isoform 3 of Dynamin-1 OS=Mus musculus OX=10090 GN=Dnm1
P07901	38	13	3.46784e-07	-2.87053	85187.2	Heat shock protein HSP 90-alpha OS=Mus musculus OX=10090 GN=Hsp90aa1 PE=1 SV=4
P05064	39	20	3.29759e-06	-2.92254	39812.2	Fructose-bisphosphate aldolase A OS=Mus musculus OX=10090 GN=Aldoa PE=1 SV=2
P39053;P39053-5;P39053-6	41	3	6.39833e-12	-6.44753	98202.2	Dynamin-1 OS=Mus musculus OX=10090 GN=Dnm1 PE=1 SV=2
P52480	41	7	5.87358e-08	-1.939	58415.3	Pyruvate kinase PKM OS=Mus musculus OX=10090 GN=Pkm PE=1 SV=4
P46460	41	21	6.23041e-08	-2.24877	83183.9	Vesicle-fusing ATPase OS=Mus musculus OX=10090 GN=Nsf PE=1 SV=2
P63260;P60710	43	11	9.51092e-05	-2.32526	42135.1	Actin_ cytoplasmic 2 OS=Mus musculus OX=10090 GN=Actg1 PE=1 SV=1
O08553	47	26	2.30854e-05	-2.01297	62676.9	Dihydropyrimidinase-related protein 2 OS=Mus musculus OX=10090 GN=Dpysl2 PE=1 SV=2
P20357	48	19	1.45824e-09	-2.29563	199531	Microtubule-associated protein 2 OS=Mus musculus OX=10090 GN=Map2 PE=1 SV=2
P11499	50	24	7.20397e-05	-2.88112	83623.5	Heat shock protein HSP 90-beta OS=Mus musculus OX=10090 GN=Hsp90ab1 PE=1 SV=3
P63017	53	16	1.86887e-05	-1.50341	71099.3	Heat shock cognate 71 kDa protein OS=Mus musculus OX=10090 GN=Hspa8 PE=1 SV=1
P16546;P16546-2	127	68	1.21332e-07	-1.58405	285396	Spectrin alpha chain_ non-erythrocytic 1 OS=Mus musculus OX=10090 GN=Sptan1 PE=1 SV=4

## Sheet: Sheet_9_PCP_Vs_NIC_Female
Sheet S9. Complete list of deregulated proteins in PCP females when compared to NIC
				NIC - / +PCP
Accession	Peptide count	Unique peptides	Anova (p)	Fold Change	Mass	Description
P84228	2	1	0.02623	-3.74062	15445.1	Histone H3.2 OS=Mus musculus OX=10090 GN=H3c2 PE=1 SV=2
Q9CQ60	2	2	8.1022e-05	-2.01689	27482.6	6-phosphogluconolactonase OS=Mus musculus OX=10090 GN=Pgls PE=1 SV=1
Q9D0F9	2	1	0.000579425	-2.73374	61703.4	Phosphoglucomutase-1 OS=Mus musculus OX=10090 GN=Pgm1 PE=1 SV=4
Q9DAF3	2	1	0.0355248	-1.82834	46226.3	Protein DDI1 homolog 1 OS=Mus musculus OX=10090 GN=Ddi1 PE=1 SV=1
P70404	2	2	0.000174499	1.61388	43184.7	Isocitrate dehydrogenase [NAD] subunit gamma 1_ mitochondrial OS=Mus musculus OX=10090 GN=Idh3g PE=1 SV=1
O70250	2	1	0.0153798	-2.64002	28998.2	Phosphoglycerate mutase 2 OS=Mus musculus OX=10090 GN=Pgam2 PE=1 SV=3
Q9ES52-2;Q9ES52-4	2	1	0.0110217	1.8382	134299	Isoform 2 of Phosphatidylinositol 3_4_5-trisphosphate 5-phosphatase 1 OS=Mus musculus OX=10090 GN=Inpp5d
Q8R081	2	1	0.00377308	2.00455	64591.1	Heterogeneous nuclear ribonucleoprotein L OS=Mus musculus OX=10090 GN=Hnrnpl PE=1 SV=2
Q8R5C5	2	1	0.00413051	-1.77676	42395.5	Beta-centractin OS=Mus musculus OX=10090 GN=Actr1b PE=1 SV=1
P02301;P84244	2	1	2.40403e-05	-3.59401	15372	Histone H3.3C OS=Mus musculus OX=10090 GN=H3-5 PE=3 SV=3
Q3URD3;Q3URD3-2	3	1	0.000127665	-2.92169	97789	Sarcolemmal membrane-associated protein OS=Mus musculus OX=10090 GN=Slmap PE=1 SV=2
O35963	3	1	0.0307749	1.50176	26222.9	Ras-related protein Rab-33B OS=Mus musculus OX=10090 GN=Rab33b PE=1 SV=1
Q571H0;Q571H0-2	4	2	0.000166261	-1.57026	256724	Nucleolar pre-ribosomal-associated protein 1 OS=Mus musculus OX=10090 GN=Urb1 PE=1 SV=2
Q91ZR1	4	1	0.00961765	-2.53602	23914	Ras-related protein Rab-4B OS=Mus musculus OX=10090 GN=Rab4b PE=1 SV=2
B2RSH2	4	1	0.00689292	-1.72721	40931.4	Guanine nucleotide-binding protein G(i) subunit alpha-1 OS=Mus musculus OX=10090 GN=Gnai1 PE=1 SV=1
Q8BZ98;Q8BZ98-2	5	1	0.0491501	1.71839	97589.8	Dynamin-3 OS=Mus musculus OX=10090 GN=Dnm3 PE=1 SV=1
Q6ZQ38	5	2	0.00344376	-1.52543	138043	Cullin-associated NEDD8-dissociated protein 1 OS=Mus musculus OX=10090 GN=Cand1 PE=1 SV=2
Q8BVE3	7	2	0.000398115	-1.81494	56311.3	V-type proton ATPase subunit H OS=Mus musculus OX=10090 GN=Atp6v1h PE=1 SV=1
Q7M6Y3;Q7M6Y3-2;Q7M6Y3-3;Q7M6Y3-4;Q7M6Y3-5;Q7M6Y3-6	8	4	0.000119465	-1.96766	71714.6	Phosphatidylinositol-binding clathrin assembly protein OS=Mus musculus OX=10090 GN=Picalm PE=1 SV=1
P84084	8	2	0.00167236	-1.68923	20643.8	ADP-ribosylation factor 5 OS=Mus musculus OX=10090 GN=Arf5 PE=1 SV=2
P62823	11	3	0.00188823	-2.98463	26100.3	Ras-related protein Rab-3C OS=Mus musculus OX=10090 GN=Rab3c PE=1 SV=1
P40142	12	6	0.00317794	1.53484	68314.9	Transketolase OS=Mus musculus OX=10090 GN=Tkt PE=1 SV=1
P18872	14	2	0.00113177	1.88012	40654.9	Guanine nucleotide-binding protein G(o) subunit alpha OS=Mus musculus OX=10090 GN=Gnao1 PE=1 SV=3
P11798;P11798-2	18	5	0.0381606	-1.58733	54685.1	Calcium/calmodulin-dependent protein kinase type II subunit alpha OS=Mus musculus OX=10090 GN=Camk2a PE=1 SV=2

## Sheet: Sheet_10_PCP_Vs_NIC_Male
Sheet S10. Complete list of deregulated proteins in PCP males when compared to NIC
				NIC- / +PCP
Accession	Peptide count	Unique peptides	Anova (p)	Fold Change	Mass	Description
P84228	2	1	0.0310776	11.5463	15445.1	Histone H3.2 OS=Mus musculus OX=10090 GN=H3c2 PE=1 SV=2
Q8BHD0	2	1	0.0033657	1.93562	25376.8	Ras-related protein Rab-39A OS=Mus musculus OX=10090 GN=Rab39a PE=1 SV=1
Q9JM99;Q9JM99-2;Q9JM99-3;Q9JM99-4	2	2	0.000619676	1.79943	117251	Proteoglycan 4 OS=Mus musculus OX=10090 GN=Prg4 PE=1 SV=2
P01831	2	1	0.00227066	2.73674	18308.1	Thy-1 membrane glycoprotein OS=Mus musculus OX=10090 GN=Thy1 PE=1 SV=1
Q8C790;Q8C790-2	2	1	0.000539376	2.06857	34144.4	Protein FAM221A OS=Mus musculus OX=10090 GN=Fam221a PE=1 SV=1
P19157;P46425	2	2	0.000120036	-3.63284	23780.3	Glutathione S-transferase P 1 OS=Mus musculus OX=10090 GN=Gstp1 PE=1 SV=2
Q8BG05;Q8BG05-2	2	1	0.00243525	3.61989	39880.2	Heterogeneous nuclear ribonucleoprotein A3 OS=Mus musculus OX=10090 GN=Hnrnpa3 PE=1 SV=1
P02301;P84244	2	1	0.0159517	5.96099	15372	Histone H3.3C OS=Mus musculus OX=10090 GN=H3-5 PE=3 SV=3
O70250	2	1	0.000247117	4.57304	28998.2	Phosphoglycerate mutase 2 OS=Mus musculus OX=10090 GN=Pgam2 PE=1 SV=3
Q80XI4;O70172	2	2	0.00737945	1.77017	47718.2	Phosphatidylinositol 5-phosphate 4-kinase type-2 beta OS=Mus musculus OX=10090 GN=Pip4k2b PE=1 SV=1
Q923L3;Q923L3-2	2	1	0.0115453	2.07209	396017	CUB and sushi domain-containing protein 1 OS=Mus musculus OX=10090 GN=Csmd1 PE=1 SV=2
Q9CPU0	2	2	0.000125475	-3.42394	20980.7	Lactoylglutathione lyase OS=Mus musculus OX=10090 GN=Glo1 PE=1 SV=3
P97953;P97953-2;P97953-3;P97953-4	2	1	0.0442845	-2.6608	48695.2	Vascular endothelial growth factor C OS=Mus musculus OX=10090 GN=Vegfc PE=1 SV=1
Q8C650;Q8C650-2	2	1	0.00694852	2.34359	53220.6	Septin-10 OS=Mus musculus OX=10090 GN=Septin10 PE=1 SV=1
Q8K2B3	2	1	0.0388663	5.44457	73669	Succinate dehydrogenase [ubiquinone] flavoprotein subunit_ mitochondrial OS=Mus musculus OX=10090 GN=Sdha PE=1 SV=1
Q3UM45	3	3	0.00101453	1.57872	41406.1	Protein phosphatase 1 regulatory subunit 7 OS=Mus musculus OX=10090 GN=Ppp1r7 PE=1 SV=2
Q3URD3;Q3URD3-2	3	1	0.0194447	2.41603	97789	Sarcolemmal membrane-associated protein OS=Mus musculus OX=10090 GN=Slmap PE=1 SV=2
Q8CGK7	3	1	0.000197971	-2.06092	44821.8	Guanine nucleotide-binding protein G(olf) subunit alpha OS=Mus musculus OX=10090 GN=Gnal PE=1 SV=1
Q3V3I2	3	1	9.26889e-05	-8.4078	40829.3	Guanine nucleotide-binding protein G(t) subunit alpha-3 OS=Mus musculus OX=10090 GN=Gnat3 PE=1 SV=2
P10630;P10630-2	3	1	0.000160163	-2.13683	46630.5	Eukaryotic initiation factor 4A-II OS=Mus musculus OX=10090 GN=Eif4a2 PE=1 SV=2
O08585	3	1	0.000511339	7.43416	25661.1	Clathrin light chain A OS=Mus musculus OX=10090 GN=Clta PE=1 SV=2
Q7TQI3	3	2	4.71501e-08	-2.90568	31498.2	Ubiquitin thioesterase OTUB1 OS=Mus musculus OX=10090 GN=Otub1 PE=1 SV=2
P31938	3	2	0.000430966	-4.45151	43816.3	Dual specificity mitogen-activated protein kinase kinase 1 OS=Mus musculus OX=10090 GN=Map2k1 PE=1 SV=2
Q9JKK7;Q9JKK7-2	3	2	0.00927836	2.17611	39510.9	Tropomodulin-2 OS=Mus musculus OX=10090 GN=Tmod2 PE=1 SV=2
Q61206	3	3	0.0365296	-1.70208	25752.5	Platelet-activating factor acetylhydrolase IB subunit alpha2 OS=Mus musculus OX=10090 GN=Pafah1b2 PE=1 SV=2
P61164	3	1	0.00159799	1.57525	42727.9	Alpha-centractin OS=Mus musculus OX=10090 GN=Actr1a PE=1 SV=1
P02104	4	2	0.00952159	-1.57849	16193.7	Hemoglobin subunit epsilon-Y2 OS=Mus musculus OX=10090 GN=Hbb-y PE=1 SV=2
D3Z7P3;D3Z7P3-2	4	3	0.0186874	-1.75859	74819.3	Glutaminase kidney isoform_ mitochondrial OS=Mus musculus OX=10090 GN=Gls PE=1 SV=1
Q8CG50	4	2	0.023803	-1.59067	23491.4	Ras-related protein Rab-43 OS=Mus musculus OX=10090 GN=Rab43 PE=1 SV=1
Q9QYC0;Q9QYC0-2	4	1	0.00585082	-2.74683	81045.8	Alpha-adducin OS=Mus musculus OX=10090 GN=Add1 PE=1 SV=2
P48722;P48722-2	4	1	0.0144648	-2.28963	95237.7	Heat shock 70 kDa protein 4L OS=Mus musculus OX=10090 GN=Hspa4l PE=1 SV=2
P62984;P0CG49;P0CG50;P62983	4	3	0.000410151	1.63961	15013.5	Ubiquitin-60S ribosomal protein L40 OS=Mus musculus OX=10090 GN=Uba52 PE=1 SV=2
Q8K386	4	1	0.00613116	3.74082	24603.6	Ras-related protein Rab-15 OS=Mus musculus OX=10090 GN=Rab15 PE=1 SV=1
P26645	4	4	9.12103e-05	6.19922	29718.4	Myristoylated alanine-rich C-kinase substrate OS=Mus musculus OX=10090 GN=Marcks PE=1 SV=2
P61089	4	1	3.19032e-06	11.1721	17194.9	Ubiquitin-conjugating enzyme E2 N OS=Mus musculus OX=10090 GN=Ube2n PE=1 SV=1
P00920	4	2	0.0425442	-1.79254	29146.6	Carbonic anhydrase 2 OS=Mus musculus OX=10090 GN=Ca2 PE=1 SV=4
Q3KNY0;Q3KNY0-2	4	3	0.0432956	1.82517	306681	Immunoglobulin-like and fibronectin type III domain-containing protein 1 OS=Mus musculus OX=10090 GN=Igfn1 PE=1 SV=3
Q01768	4	1	0.02619	-1.819	17477.2	Nucleoside diphosphate kinase B OS=Mus musculus OX=10090 GN=Nme2 PE=1 SV=1
Q6PHZ2;Q6PHZ2-2;Q6PHZ2-4;Q6PHZ2-5	4	1	0.000682277	2.67338	56996.8	Calcium/calmodulin-dependent protein kinase type II subunit delta OS=Mus musculus OX=10090 GN=Camk2d PE=1 SV=1
Q6P8J7	5	2	0.000810169	1.72546	47929.6	Creatine kinase S-type_ mitochondrial OS=Mus musculus OX=10090 GN=Ckmt2 PE=1 SV=1
P12960	5	2	0.000505148	1.80958	114244	Contactin-1 OS=Mus musculus OX=10090 GN=Cntn1 PE=1 SV=1
Q6ZQ38	5	2	0.000684343	-2.09384	138043	Cullin-associated NEDD8-dissociated protein 1 OS=Mus musculus OX=10090 GN=Cand1 PE=1 SV=2
P55258	5	1	0.026404	-1.93102	23839.3	Ras-related protein Rab-8A OS=Mus musculus OX=10090 GN=Rab8a PE=1 SV=2
Q9QYG0;Q9QYG0-2	5	3	0.0165975	-1.56874	41131.5	Protein NDRG2 OS=Mus musculus OX=10090 GN=Ndrg2 PE=1 SV=1
O88569;O88569-2;O88569-3	5	2	0.000456325	-2.35761	37459.8	Heterogeneous nuclear ribonucleoproteins A2/B1 OS=Mus musculus OX=10090 GN=Hnrnpa2b1 PE=1 SV=2
Q8BZ98;Q8BZ98-2	5	1	0.00274437	2.13454	97589.8	Dynamin-3 OS=Mus musculus OX=10090 GN=Dnm3 PE=1 SV=1
Q8K0U4	5	2	0.00275338	-1.65331	75213.7	Heat shock 70 kDa protein 12A OS=Mus musculus OX=10090 GN=Hspa12a PE=1 SV=1
P15532	6	4	0.00641927	-1.67548	17321.9	Nucleoside diphosphate kinase A OS=Mus musculus OX=10090 GN=Nme1 PE=1 SV=1
Q5M8N0	6	2	4.60433e-05	-2.00451	18726.4	CB1 cannabinoid receptor-interacting protein 1 OS=Mus musculus OX=10090 GN=Cnrip1 PE=1 SV=1
Q64467	6	1	0.00472066	2.21222	48398.4	Glyceraldehyde-3-phosphate dehydrogenase_ testis-specific OS=Mus musculus OX=10090 GN=Gapdhs PE=1 SV=1
Q62048;Q62048-2	7	4	1.80427e-06	5.24083	15111.2	Astrocytic phosphoprotein PEA-15 OS=Mus musculus OX=10090 GN=Pea15 PE=1 SV=1
P61750	7	1	0.00589704	-6.01056	20510.7	ADP-ribosylation factor 4 OS=Mus musculus OX=10090 GN=Arf4 PE=1 SV=2
Q9WUA3;Q9WUA3-2	8	3	0.00265839	1.69756	86481.7	ATP-dependent 6-phosphofructokinase_ platelet type OS=Mus musculus OX=10090 GN=Pfkp PE=1 SV=1
P61027	8	7	0.00144655	2.69429	22769.1	Ras-related protein Rab-10 OS=Mus musculus OX=10090 GN=Rab10 PE=1 SV=1
Q9D1G1	8	2	5.63016e-08	1.83403	22358.3	Ras-related protein Rab-1B OS=Mus musculus OX=10090 GN=Rab1b PE=1 SV=1
Q9CZT8	8	3	0.0414832	-1.56647	24985.1	Ras-related protein Rab-3B OS=Mus musculus OX=10090 GN=Rab3b PE=1 SV=1
Q8K183	9	5	0.000342437	-2.54366	35300.4	Pyridoxal kinase OS=Mus musculus OX=10090 GN=Pdxk PE=1 SV=1
O89053	9	8	6.03804e-05	2.09221	51673.6	Coronin-1A OS=Mus musculus OX=10090 GN=Coro1a PE=1 SV=5
Q8QZT1	9	5	1.40732e-07	1.90069	45158.4	Acetyl-CoA acetyltransferase_ mitochondrial OS=Mus musculus OX=10090 GN=Acat1 PE=1 SV=1
P99029;P99029-2	9	5	0.0222863	-1.61965	22239.7	Peroxiredoxin-5_ mitochondrial OS=Mus musculus OX=10090 GN=Prdx5 PE=1 SV=2
P19639	9	1	1.37943e-06	-2.02179	25929.8	Glutathione S-transferase Mu 3 OS=Mus musculus OX=10090 GN=Gstm3 PE=1 SV=2
Q91V41	9	2	0.0267465	-1.65759	24125.1	Ras-related protein Rab-14 OS=Mus musculus OX=10090 GN=Rab14 PE=1 SV=3
P10637-5;P10637-3;P10637-4	9	1	8.08057e-05	1.98113	39074.7	Isoform Tau-D of Microtubule-associated protein tau OS=Mus musculus OX=10090 GN=Mapt
P06837	9	6	0.0137722	1.58802	23746.5	Neuromodulin OS=Mus musculus OX=10090 GN=Gap43 PE=1 SV=1
P58252	10	5	0.0340584	-1.88412	96283.7	Elongation factor 2 OS=Mus musculus OX=10090 GN=Eef2 PE=1 SV=2
Q8VDN2	10	3	0.000226456	1.57707	114294	Sodium/potassium-transporting ATPase subunit alpha-1 OS=Mus musculus OX=10090 GN=Atp1a1 PE=1 SV=1
Q9D0K2	10	5	0.000874288	-2.2201	56387.9	Succinyl-CoA:3-ketoacid coenzyme A transferase 1_ mitochondrial OS=Mus musculus OX=10090 GN=Oxct1 PE=1 SV=1
Q91XV3	10	5	1.2044e-05	2.68069	22086.6	Brain acid soluble protein 1 OS=Mus musculus OX=10090 GN=Basp1 PE=1 SV=3
P45591	10	5	0.000197277	1.7659	18823.7	Cofilin-2 OS=Mus musculus OX=10090 GN=Cfl2 PE=1 SV=1
P62880	10	2	7.34934e-05	-3.86187	38072.5	Guanine nucleotide-binding protein G(I)/G(S)/G(T) subunit beta-2 OS=Mus musculus OX=10090 GN=Gnb2 PE=1 SV=3
P17879;Q61696	10	2	4.39581e-06	1.89831	70461.5	Heat shock 70 kDa protein 1B OS=Mus musculus OX=10090 GN=Hspa1b PE=1 SV=3
P50518	11	4	5.44489e-06	1.85618	26214.5	V-type proton ATPase subunit E 1 OS=Mus musculus OX=10090 GN=Atp6v1e1 PE=1 SV=2
P61264	12	6	0.000593165	-2.10889	33472.9	Syntaxin-1B OS=Mus musculus OX=10090 GN=Stx1b PE=1 SV=1
A2AQ07	12	1	0.0323495	-4.19085	51125.4	Tubulin beta-1 chain OS=Mus musculus OX=10090 GN=Tubb1 PE=1 SV=1
P21550	12	3	0.015779	1.73043	47367.1	Beta-enolase OS=Mus musculus OX=10090 GN=Eno3 PE=1 SV=3
Q6PIC6;Q64436	12	3	0.00219104	2.20243	113117	Sodium/potassium-transporting ATPase subunit alpha-3 OS=Mus musculus OX=10090 GN=Atp1a3 PE=1 SV=1
Q3ULJ0;Q3ULJ0-2	13	1	0.00504408	2.96698	38852.9	Glycerol-3-phosphate dehydrogenase 1-like protein OS=Mus musculus OX=10090 GN=Gpd1l PE=1 SV=2
Q61316	14	3	0.000701004	1.75147	94931.2	Heat shock 70 kDa protein 4 OS=Mus musculus OX=10090 GN=Hspa4 PE=1 SV=1
P20029	14	6	3.61064e-05	2.18045	72536.2	Endoplasmic reticulum chaperone BiP OS=Mus musculus OX=10090 GN=Hspa5 PE=1 SV=3
P28652	14	2	0.0103681	4.01069	61202.3	Calcium/calmodulin-dependent protein kinase type II subunit beta OS=Mus musculus OX=10090 GN=Camk2b PE=1 SV=2
P17426;P17426-2	16	7	0.0277847	-1.72006	108748	AP-2 complex subunit alpha-1 OS=Mus musculus OX=10090 GN=Ap2a1 PE=1 SV=1
P01942	16	8	0.0144875	-1.59102	15142.2	Hemoglobin subunit alpha OS=Mus musculus OX=10090 GN=Hba PE=1 SV=2
Q61644	16	8	2.90405e-05	2.25557	50917.5	Protein kinase C and casein kinase substrate in neurons protein 1 OS=Mus musculus OX=10090 GN=Pacsin1 PE=1 SV=1
P63085	18	8	0.00206293	1.50419	41674.9	Mitogen-activated protein kinase 1 OS=Mus musculus OX=10090 GN=Mapk1 PE=1 SV=3
Q9R0P9	19	9	0.000232479	1.71808	25180.5	Ubiquitin carboxyl-terminal hydrolase isozyme L1 OS=Mus musculus OX=10090 GN=Uchl1 PE=1 SV=1
P06151	19	11	0.000332187	1.6704	36840.8	L-lactate dehydrogenase A chain OS=Mus musculus OX=10090 GN=Ldha PE=1 SV=3
P26443	20	12	0.00132984	1.67318	61679.1	Glutamate dehydrogenase 1_ mitochondrial OS=Mus musculus OX=10090 GN=Glud1 PE=1 SV=1
Q9Z0E0;Q9Z0E0-2	20	12	2.58847e-05	1.8895	80321.1	Neurochondrin OS=Mus musculus OX=10090 GN=Ncdn PE=1 SV=1
P61982	20	11	0.000108278	-1.8787	28473.7	14-3-3 protein gamma OS=Mus musculus OX=10090 GN=Ywhag PE=1 SV=2
P62259	21	9	0.00174282	1.50413	29345	14-3-3 protein epsilon OS=Mus musculus OX=10090 GN=Ywhae PE=1 SV=1
P46096	22	7	1.09095e-07	2.29861	47760.2	Synaptotagmin-1 OS=Mus musculus OX=10090 GN=Syt1 PE=1 SV=1
Q61548;Q61548-2;Q61548-3	22	13	0.0112246	-1.62222	92136.7	Clathrin coat assembly protein AP180 OS=Mus musculus OX=10090 GN=Snap91 PE=1 SV=1
P05201	22	14	0.000681469	-1.56137	46532.8	Aspartate aminotransferase_ cytoplasmic OS=Mus musculus OX=10090 GN=Got1 PE=1 SV=3
P17710;P17710-3;P17710-4;P17710-2	22	13	3.93622e-06	1.54113	109615	Hexokinase-1 OS=Mus musculus OX=10090 GN=Hk1 PE=1 SV=3
P63101	23	8	0.0143869	-1.61327	27942.3	14-3-3 protein zeta/delta OS=Mus musculus OX=10090 GN=Ywhaz PE=1 SV=1
O35643	24	6	4.65108e-08	2.1237	104790	AP-1 complex subunit beta-1 OS=Mus musculus OX=10090 GN=Ap1b1 PE=1 SV=2
P16125	24	9	2.99435e-06	3.76429	36857.5	L-lactate dehydrogenase B chain OS=Mus musculus OX=10090 GN=Ldhb PE=1 SV=2
Q8BFZ3	25	7	3.38695e-07	1.81336	42346.5	Beta-actin-like protein 2 OS=Mus musculus OX=10090 GN=Actbl2 PE=1 SV=1
P56480	28	17	0.000164078	1.59883	56300.6	ATP synthase subunit beta_ mitochondrial OS=Mus musculus OX=10090 GN=Atp5f1b PE=1 SV=2
O88935;O88935-1;O88935-3	28	12	0.00383573	1.50129	74268.5	Synapsin-1 OS=Mus musculus OX=10090 GN=Syn1 PE=1 SV=2
Q02053;P31254	30	12	0.00142308	-1.62502	119007	Ubiquitin-like modifier-activating enzyme 1 OS=Mus musculus OX=10090 GN=Uba1 PE=1 SV=1
P16858	31	15	0.00145909	1.6648	36095.2	Glyceraldehyde-3-phosphate dehydrogenase OS=Mus musculus OX=10090 GN=Gapdh PE=1 SV=2
P52480-2	35	5	8.28438e-05	1.54469	58498.5	Isoform M1 of Pyruvate kinase PKM OS=Mus musculus OX=10090 GN=Pkm
P17182	36	16	0.0057436	-1.77352	47483.1	Alpha-enolase OS=Mus musculus OX=10090 GN=Eno1 PE=1 SV=3
P39053-3	37	1	0.00387443	1.6313	96269.8	Isoform 3 of Dynamin-1 OS=Mus musculus OX=10090 GN=Dnm1
Q7TMM9	37	2	0.000981858	-2.36	50306.3	Tubulin beta-2A chain OS=Mus musculus OX=10090 GN=Tubb2a PE=1 SV=1
P39053-4	37	1	0.0425587	1.59162	97823.7	Isoform 4 of Dynamin-1 OS=Mus musculus OX=10090 GN=Dnm1
P07901	38	13	1.22553e-06	1.68668	85187.2	Heat shock protein HSP 90-alpha OS=Mus musculus OX=10090 GN=Hsp90aa1 PE=1 SV=4
P52480	41	7	8.28438e-05	1.54469	58415.3	Pyruvate kinase PKM OS=Mus musculus OX=10090 GN=Pkm PE=1 SV=4
P39053;P39053-5;P39053-6	41	3	0.00559619	4.14155	98202.2	Dynamin-1 OS=Mus musculus OX=10090 GN=Dnm1 PE=1 SV=2
P63260;P60710	43	11	2.37671e-05	2.00135	42135.1	Actin_ cytoplasmic 2 OS=Mus musculus OX=10090 GN=Actg1 PE=1 SV=1
O08553	47	26	0.00251194	1.75018	62676.9	Dihydropyrimidinase-related protein 2 OS=Mus musculus OX=10090 GN=Dpysl2 PE=1 SV=2
P11499	50	24	0.000631149	1.58513	83623.5	Heat shock protein HSP 90-beta OS=Mus musculus OX=10090 GN=Hsp90ab1 PE=1 SV=3
P16546;P16546-2	127	68	0.00380714	1.5741	285396	Spectrin alpha chain_ non-erythrocytic 1 OS=Mus musculus OX=10090 GN=Sptan1 PE=1 SV=4

[truncated: 8 more sheets: Sheet_11_PCPNIC_Vs_NIC_Female, Sheet_12_PCPNIC_Vs_NIC_Male, Sheet_13_PCPNIC_Vs_PCP_Female, Sheet_14_PCPNIC_Vs_PCP_Male, Sheet_15_Marker_PCP_Female, Sheet_16_Markers_PCP_Male, Sheet_17_Markers_PCPNIC_Female, Sheet_18_Markers_PCPNIC_Male]
